# Supplementary material for: Naïve Bayes classifier predicts functional microRNA target interactions in colorectal cancer
Source: Royal Society of Chemistry journal article supplement (doi:10.1039/c5mb00245a), 2015-06-11
Supplement: c5mb00245a4.xlsx [file c5mb00245a4.xlsx]

## Sheet: Novel CRC predictions
Gene ID	Gene Symbol	miRNA	miRNA Seq.	mRNA Seq.	binding pattern	Alignment score	Position in 3'UTR
ENSG00000007168	PAFAH1B1	hsa-miR-17-5p	CAAAGUGCUUACAGUGCAGGUAG	CUGGAUGCACUCUGAUGAUACCAUG	((.(((((...(((.........&)))...))))).))...........	61	334
ENSG00000053254	FOXN3	hsa-miR-17-5p	CAAAGUGCUUACAGUGCAGGUAG	CAUACCUGCAUUUUGCAUUCUUCG	...(((((....((((((((((.&..))))))))))..))))).....	75	146
ENSG00000053254	FOXN3	hsa-miR-17-5p	CAAAGUGCUUACAGUGCAGGUAG	AUACUCUGAUUCUGUAACAUUUCUG	..(((((.((((((.(((((((.&.))).))).).)))))))))))...	68	497
ENSG00000053254	FOXN3	hsa-miR-17-5p	CAAAGUGCUUACAGUGCAGGUAG	CUAUUUGUGAAAGAAUAUUUUG	(((((((.((....(((((((((&)))))))))....)))))))))	64	2906
ENSG00000053254	FOXN3	hsa-miR-17-5p	CAAAGUGCUUACAGUGCAGGUAG	UUACUCUGCAAUAUAAAAAUAUCUUCAUG	..............((((((((.&.))).)))))...................	61	4601
ENSG00000079335	CDC14A	hsa-miR-17-5p	CAAAGUGCUUACAGUGCAGGUAG	CUGCUGCACACGCUAGCAUAUCUG	....(((((....((((((.(((&))))))))).....))))).....	64	941
ENSG00000100307	CBX7	hsa-miR-17-5p	CAAAGUGCUUACAGUGCAGGUAG	CUAUUUGCGCAAUCUGUGGGUCUGUG	......(((((((((((((((((&))))))))))....))))))).....	66	951
ENSG00000100307	CBX7	hsa-miR-17-5p	CAAAGUGCUUACAGUGCAGGUAG	CACCUGCACUCACCCCACCUUG	(((.(((.....(((((((((..&.))))))))).....))).)))	72	2285
ENSG00000101745	ANKRD12	hsa-miR-17-5p	CAAAGUGCUUACAGUGCAGGUAG	GUAUAUGCCUGAAAAGGUUUUG	(((((..(((.(((.(((.(((.&.))).))))))..))).)))))	60	183
ENSG00000104332	SFRP1	hsa-miR-17-5p	CAAAGUGCUUACAGUGCAGGUAG	CUGCGCCUGUCAGUAGUGGACAUUG	...(.((((.(((((((((....&))))).)))).)))).)........	60	3087
ENSG00000104332	SFRP1	hsa-miR-17-5p	CAAAGUGCUUACAGUGCAGGUAG	CAGCCUGCAGGGAAUAACAUACUG	...........(..(((((((..&..)))))))..)............	60	291
ENSG00000104332	SFRP1	hsa-miR-17-5p	CAAAGUGCUUACAGUGCAGGUAG	CUACUUCUCUGUUGUCAAACUG	...(((....((((.(.((((((&))))))).))))......))).	60	1261
ENSG00000104332	SFRP1	hsa-miR-17-5p	CAAAGUGCUUACAGUGCAGGUAG	CUGCGCCUGUCAGUAGUGGACAUUG	...(.((((.(((((((((....&))))).)))).)))).)........	60	3093
ENSG00000104332	SFRP1	hsa-miR-17-5p	CAAAGUGCUUACAGUGCAGGUAG	CAGCCUGCAGGGAAUAACAUACUG	...........(..(((((((..&..)))))))..)............	60	297
ENSG00000104332	SFRP1	hsa-miR-17-5p	CAAAGUGCUUACAGUGCAGGUAG	CUACUUCUCUGUUGUCAAACUG	...(((....((((.(.((((((&))))))).))))......))).	60	1267
ENSG00000109943	CRTAM	hsa-miR-17-5p	CAAAGUGCUUACAGUGCAGGUAG	CACCUGUAGUCUCAGAUACUUGG	..(((((((...(.(((((((..&.))))))).)...)).)))))..	68	608
ENSG00000109943	CRTAM	hsa-miR-17-5p	CAAAGUGCUUACAGUGCAGGUAG	UUGCCGCAGUGUCACCUCAGUG	....(((...(((.(((.((((.&.))))))).)))))).......	62	1184
ENSG00000109943	CRTAM	hsa-miR-17-5p	CAAAGUGCUUACAGUGCAGGUAG	CACCUGUAGUCUCAGAUACUUGG	..(((((((...(.(((((((..&.))))))).)...)).)))))..	68	610
ENSG00000109943	CRTAM	hsa-miR-17-5p	CAAAGUGCUUACAGUGCAGGUAG	UUGCCGCAGUGUCACCUCAGUG	....(((...(((.(((.((((.&.))))))).)))))).......	62	1186
ENSG00000112245	PTP4A1	hsa-miR-17-5p	CAAAGUGCUUACAGUGCAGGUAG	CACCAGCUUGUAAAAACUUAG	..((((..((((((.((.(((..&.))).))))))))..))))..	69	2179
ENSG00000112245	PTP4A1	hsa-miR-17-5p	CAAAGUGCUUACAGUGCAGGUAG	CUAAUGCUACUGGAAGUGGAACUUG	..(((((((..(((((((..(((&))).))).))))..)))...)))).	62	3377
ENSG00000112773	FAM46A	hsa-miR-17-5p	CAAAGUGCUUACAGUGCAGGUAG	CACACUGCAUUUAAAUAUUUAG	..(((((.(((.(((((((((..&.)).)))))))))).)))))..	65	2239
ENSG00000112773	FAM46A	hsa-miR-17-5p	CAAAGUGCUUACAGUGCAGGUAG	UUGCUUCACUGUGCAUAAAGUUG	....((((..((((((.(((((.&.))))))))))))))).......	60	611
ENSG00000112773	FAM46A	hsa-miR-17-5p	CAAAGUGCUUACAGUGCAGGUAG	CACACUGCAUUUAAAUAUUUAG	..(((((.(((.(((((((((..&.)).)))))))))).)))))..	65	2239
ENSG00000112773	FAM46A	hsa-miR-17-5p	CAAAGUGCUUACAGUGCAGGUAG	UUGCUUCACUGUGCAUAAAGUUG	....((((..((((((.(((((.&.))))))))))))))).......	60	611
ENSG00000112773	FAM46A	hsa-miR-17-5p	CAAAGUGCUUACAGUGCAGGUAG	CUAUUUUGCAGUGUAAACCCCAUCUG	........(((((.(((((((((&))).)))))).)))))..........	65	63
ENSG00000112773	FAM46A	hsa-miR-17-5p	CAAAGUGCUUACAGUGCAGGUAG	CACACUGCAUUUAAAUAUUUAG	..(((((.(((.(((((((((..&.)).)))))))))).)))))..	65	2239
ENSG00000112773	FAM46A	hsa-miR-17-5p	CAAAGUGCUUACAGUGCAGGUAG	UUGCUUCACUGUGCAUAAAGUUG	....((((..((((((.(((((.&.))))))))))))))).......	60	611
ENSG00000115525	ST3GAL5	hsa-miR-17-5p	CAAAGUGCUUACAGUGCAGGUAG	AUAUCCACAUAAGCAAUUUUG	(((((((((((..(((..((((.&.))))))).))))).))))))	62	290
ENSG00000115525	ST3GAL5	hsa-miR-17-5p	CAAAGUGCUUACAGUGCAGGUAG	CUGUCGGCGCUGUGUGGUUAUUG	......(((((((((((.(((((&))))).)))))))).))).....	71	137
ENSG00000118922	KLF12	hsa-miR-17-5p	CAAAGUGCUUACAGUGCAGGUAG	CUGCCAUGCCCUGAAGAAAACCAACAUUG	.......(((.(((.((((((((&))))).))).)))))).............	66	8768
ENSG00000118922	KLF12	hsa-miR-17-5p	CAAAGUGCUUACAGUGCAGGUAG	CUGCAUUGGCAUCUGCAGGGAUAUUG	....((((...((((((((....&))))))))))))..............	63	7936
ENSG00000118922	KLF12	hsa-miR-17-5p	CAAAGUGCUUACAGUGCAGGUAG	AUACUCUGUAGUGUUUAGGCAACCCUG	.....((((((((.((((((((.&.))).))))).)))..)))))......	65	382
ENSG00000118922	KLF12	hsa-miR-17-5p	CAAAGUGCUUACAGUGCAGGUAG	GUGCCUGUCAGUAAACCUUAUG	..(((.(.((((.(.(((((((.&.)))))))).)))).))))...	65	4130
ENSG00000118922	KLF12	hsa-miR-17-5p	CAAAGUGCUUACAGUGCAGGUAG	CUAUAUGCAACUCCUACUUCACAUUG	..(((((.......((((.((((&)))).)))).....))))).......	61	7192
ENSG00000118922	KLF12	hsa-miR-17-5p	CAAAGUGCUUACAGUGCAGGUAG	AUACCAGCAUCCAUGUUACAGUCUG	......(((.(((((((.((((.&.)))).))))...)))...)))...	60	5438
ENSG00000132561	MATN2	hsa-miR-17-5p	CAAAGUGCUUACAGUGCAGGUAG	CUGCCUUAGUGUGCAAUCUCAUUUG	.....(((..(((.((.((((((&)))))))).))))))..........	66	180
ENSG00000132561	MATN2	hsa-miR-17-5p	CAAAGUGCUUACAGUGCAGGUAG	CUGCCUUAGUGUGCAAUCUCAUUUG	.....(((..(((.((.((((((&)))))))).))))))..........	66	182
ENSG00000132561	MATN2	hsa-miR-17-5p	CAAAGUGCUUACAGUGCAGGUAG	CUGCCUUAGUGUGCAAUCUCAUUUG	.....(((..(((.((.((((((&)))))))).))))))..........	66	184
ENSG00000132561	MATN2	hsa-miR-17-5p	CAAAGUGCUUACAGUGCAGGUAG	CUGCCUUAGUGUGCAAUCUCAUUUG	.....(((..(((.((.((((((&)))))))).))))))..........	66	184
ENSG00000132561	MATN2	hsa-miR-17-5p	CAAAGUGCUUACAGUGCAGGUAG	CUGCCUUAGUGUGCAAUCUCAUUUG	.....(((..(((.((.((((((&)))))))).))))))..........	66	686
ENSG00000136011	STAB2	hsa-miR-17-5p	CAAAGUGCUUACAGUGCAGGUAG	CAACUGUGAAUUCUCAGCACCAGUUG	....(((((((((((........&..)))))).......)))))......	63	6
ENSG00000136011	STAB2	hsa-miR-17-5p	CAAAGUGCUUACAGUGCAGGUAG	CAACUGUGAAUUCUCAGCACCAGUUG	....(((((((((((........&..)))))).......)))))......	63	317
ENSG00000138639	ARHGAP24	hsa-miR-17-5p	CAAAGUGCUUACAGUGCAGGUAG	CUGCUUUGUCACUUUCUCAAUCAAAUUG	.((((((...((((.((((....&)))).)))))))))).............	61	1149
ENSG00000138639	ARHGAP24	hsa-miR-17-5p	CAAAGUGCUUACAGUGCAGGUAG	CUGGAUGCACUCUGAUGAUACCAUG	((.(((((...(((.........&)))...))))).))...........	61	3753
ENSG00000138735	PDE5A	hsa-miR-17-5p	CAAAGUGCUUACAGUGCAGGUAG	GUGUCUGUAUUUGGUAUAUACUUUG	(((((((..(((((((((((((.&.))))))))))..)))..)))))))	65	4097
ENSG00000138735	PDE5A	hsa-miR-17-5p	CAAAGUGCUUACAGUGCAGGUAG	CUGUCUGUAUAGUGUCUGUAUUUGG	..((((((..(((((((((((((&))))))))))..)))..))))))..	69	4108
ENSG00000138735	PDE5A	hsa-miR-17-5p	CAAAGUGCUUACAGUGCAGGUAG	GUGUCUGUAUUUGGUAUAUACUUUG	(((((((..(((((((((((((.&.))))))))))..)))..)))))))	65	4099
ENSG00000138735	PDE5A	hsa-miR-17-5p	CAAAGUGCUUACAGUGCAGGUAG	CUGUCUGUAUAGUGUCUGUAUUUGG	..((((((..(((((((((((((&))))))))))..)))..))))))..	69	4110
ENSG00000145012	LPP	hsa-miR-17-5p	CAAAGUGCUUACAGUGCAGGUAG	UUACCUGACUGAAGCUACUAUG	...(((((((.((((.((((((.&.)))))))))))))).)))...	87	11450
ENSG00000145012	LPP	hsa-miR-17-5p	CAAAGUGCUUACAGUGCAGGUAG	UUACCUGACUGAAGCUACUAUG	...(((((((.((((.((((((.&.)))))))))))))).)))...	87	11450
ENSG00000145012	LPP	hsa-miR-17-5p	CAAAGUGCUUACAGUGCAGGUAG	UUACCUGACUGAAGCUACUAUG	...(((((((.((((.((((((.&.)))))))))))))).)))...	87	11450
ENSG00000145012	LPP	hsa-miR-17-5p	CAAAGUGCUUACAGUGCAGGUAG	GUGCCUGCAGUCCCAGCUACUCAG	...((((((...(.((((((((.&.)))))))).)...))).)))...	63	4090
ENSG00000145335	SNCA	hsa-miR-17-5p	CAAAGUGCUUACAGUGCAGGUAG	UUAUCUGACGGUAAUUUUUG	(((((...((((.((.((((((.&.)))))))).)))).)))))	64	435
ENSG00000145335	SNCA	hsa-miR-17-5p	CAAAGUGCUUACAGUGCAGGUAG	CUACACUCGGAAUUCCCUGAAGCAACACUG	.....(((((.((((.(((((((&)))).)).).).....))))))))......	60	1791
ENSG00000145335	SNCA	hsa-miR-17-5p	CAAAGUGCUUACAGUGCAGGUAG	UUAUCUGACGGUAAUUUUUG	(((((...((((.((.((((((.&.)))))))).)))).)))))	64	408
ENSG00000145335	SNCA	hsa-miR-17-5p	CAAAGUGCUUACAGUGCAGGUAG	CUACACUCGGAAUUCCCUGAAGCAACACUG	.....(((((.((((.(((((((&)))).)).).).....))))))))......	60	1764
ENSG00000145335	SNCA	hsa-miR-17-5p	CAAAGUGCUUACAGUGCAGGUAG	UUAUCUGACGGUAAUUUUUG	(((((...((((.((.((((((.&.)))))))).)))).)))))	64	414
ENSG00000145335	SNCA	hsa-miR-17-5p	CAAAGUGCUUACAGUGCAGGUAG	CUACACUCGGAAUUCCCUGAAGCAACACUG	.....(((((.((((.(((((((&)))).)).).).....))))))))......	60	1770
ENSG00000145335	SNCA	hsa-miR-17-5p	CAAAGUGCUUACAGUGCAGGUAG	UUAUCUGACGGUAAUUUUUG	(((((...((((.((.((((((.&.)))))))).)))).)))))	64	414
ENSG00000145335	SNCA	hsa-miR-17-5p	CAAAGUGCUUACAGUGCAGGUAG	CUACACUCGGAAUUCCCUGAAGCAACACUG	.....(((((.((((.(((((((&)))).)).).).....))))))))......	60	1770
ENSG00000145349	CAMK2D	hsa-miR-17-5p	CAAAGUGCUUACAGUGCAGGUAG	CUAGCUGAAUGUAGGAAAAAUG	.......((((((...(((.(((&))).)))..)))))).......	62	162
ENSG00000145349	CAMK2D	hsa-miR-17-5p	CAAAGUGCUUACAGUGCAGGUAG	CUACUGCAGUAUAAUGUCUCCAUG	......(((((.(.(((((.(((&)))))))).).))).)).......	62	688
ENSG00000145349	CAMK2D	hsa-miR-17-5p	CAAAGUGCUUACAGUGCAGGUAG	CUAGCUGAAUGUAGGAAAAAUG	.......((((((...(((.(((&))).)))..)))))).......	62	162
ENSG00000145349	CAMK2D	hsa-miR-17-5p	CAAAGUGCUUACAGUGCAGGUAG	CUACUGCAGUAUAAUGUCUCCAUG	......(((((.(.(((((.(((&)))))))).).))).)).......	62	688
ENSG00000145423	SFRP2	hsa-miR-17-5p	CAAAGUGCUUACAGUGCAGGUAG	AUAGCUCACUUUAAAGCUAGUUUUG	(((((.((((..((((.((.((.&.)).))))))...))))...)))))	62	557
ENSG00000147459	DOCK5	hsa-miR-17-5p	CAAAGUGCUUACAGUGCAGGUAG	CACCUGCCUGUAGUCCCAGCUACUCAG	...(((((((((((.((((((..&.))))))))))).....))).)))...	71	867
ENSG00000147459	DOCK5	hsa-miR-17-5p	CAAAGUGCUUACAGUGCAGGUAG	CUCCCUGCUGACUGCAUUUCCUG	..((((((...((..(((((.((&)).)))))))...))))))....	67	849
ENSG00000147459	DOCK5	hsa-miR-17-5p	CAAAGUGCUUACAGUGCAGGUAG	AUACUUUGCUGUUGGAUACUAUG	...((((((.((((((.(((((.&.))))))))))).)).))))...	62	2599
ENSG00000147459	DOCK5	hsa-miR-17-5p	CAAAGUGCUUACAGUGCAGGUAG	CUCCUGGUCAGCAGCCUCUUAG	.....((((.((....((((...&..)))))).)))).........	60	3100
ENSG00000147459	DOCK5	hsa-miR-17-5p	CAAAGUGCUUACAGUGCAGGUAG	UUGCCUGCCUGAUUCUCUGUG	...........(((.(((((((.&.))))))))))..........	67	2912
ENSG00000147459	DOCK5	hsa-miR-17-5p	CAAAGUGCUUACAGUGCAGGUAG	CUCCCUGCUGACUGCAUUUCCUG	..((((((...((..(((((.((&)).)))))))...))))))....	67	4309
ENSG00000147459	DOCK5	hsa-miR-17-5p	CAAAGUGCUUACAGUGCAGGUAG	CUCUUGAUUGUGGAAUUAAUUUG	........(((((((.((((...&..)))))))))))..........	61	3427
ENSG00000147526	TACC1	hsa-miR-17-5p	CAAAGUGCUUACAGUGCAGGUAG	CUAUUUGCCAUGACGUUUUG	...........((..((((((((&))))))))..))........	62	4272
ENSG00000147526	TACC1	hsa-miR-17-5p	CAAAGUGCUUACAGUGCAGGUAG	CUGCGUUGACUACUGCUAUCAGGAUUGUG	...........((((((((....&))))))))....(((....))).......	61	163
ENSG00000147526	TACC1	hsa-miR-17-5p	CAAAGUGCUUACAGUGCAGGUAG	CCCUCCAUUGUAAAUCCAUAG	....(((.((((((((.(((...&.))).))))))))...)))..	61	2957
ENSG00000147526	TACC1	hsa-miR-17-5p	CAAAGUGCUUACAGUGCAGGUAG	CUAUUUGCCAUGACGUUUUG	...........((..((((((((&))))))))..))........	62	2019
ENSG00000147526	TACC1	hsa-miR-17-5p	CAAAGUGCUUACAGUGCAGGUAG	CCCUCCAUUGUAAAUCCAUAG	....(((.((((((((.(((...&.))).))))))))...)))..	61	704
ENSG00000147526	TACC1	hsa-miR-17-5p	CAAAGUGCUUACAGUGCAGGUAG	CUAUUUGCCAUGACGUUUUG	...........((..((((((((&))))))))..))........	62	2037
ENSG00000147526	TACC1	hsa-miR-17-5p	CAAAGUGCUUACAGUGCAGGUAG	CCCUCCAUUGUAAAUCCAUAG	....(((.((((((((.(((...&.))).))))))))...)))..	61	722
ENSG00000147526	TACC1	hsa-miR-17-5p	CAAAGUGCUUACAGUGCAGGUAG	CUAUUUGCCAUGACGUUUUG	...........((..((((((((&))))))))..))........	62	2037
ENSG00000147526	TACC1	hsa-miR-17-5p	CAAAGUGCUUACAGUGCAGGUAG	CCCUCCAUUGUAAAUCCAUAG	....(((.((((((((.(((...&.))).))))))))...)))..	61	722
ENSG00000147526	TACC1	hsa-miR-17-5p	CAAAGUGCUUACAGUGCAGGUAG	CUAUUUGCCAUGACGUUUUG	...........((..((((((((&))))))))..))........	62	4272
ENSG00000147526	TACC1	hsa-miR-17-5p	CAAAGUGCUUACAGUGCAGGUAG	CUGCGUUGACUACUGCUAUCAGGAUUGUG	...........((((((((....&))))))))....(((....))).......	61	163
ENSG00000147526	TACC1	hsa-miR-17-5p	CAAAGUGCUUACAGUGCAGGUAG	CCCUCCAUUGUAAAUCCAUAG	....(((.((((((((.(((...&.))).))))))))...)))..	61	2957
ENSG00000151090	THRB	hsa-miR-17-5p	CAAAGUGCUUACAGUGCAGGUAG	UUACCUGCUUUAUCUACAGACAGAUUG	...............(((((((.&.)))))))...((((......))))..	63	2548
ENSG00000151090	THRB	hsa-miR-17-5p	CAAAGUGCUUACAGUGCAGGUAG	CACCUGCGCUCCCACCCCCUCG	....(((.....(((((((((..&.)))))))))..))).......	60	1778
ENSG00000151090	THRB	hsa-miR-17-5p	CAAAGUGCUUACAGUGCAGGUAG	UUACCUGCUUUAUCUACAGACAGAUUG	...............(((((((.&.)))))))...((((......))))..	63	3598
ENSG00000151090	THRB	hsa-miR-17-5p	CAAAGUGCUUACAGUGCAGGUAG	CACCUGCGCUCCCACCCCCUCG	....(((.....(((((((((..&.)))))))))..))).......	60	2828
ENSG00000165338	HECTD2	hsa-miR-17-5p	CAAAGUGCUUACAGUGCAGGUAG	UUACUUGUGUACUCUGUAAUAUUUG	..(((((.((((((((((((((.&.))))))))....))))))))))).	63	1657
ENSG00000165338	HECTD2	hsa-miR-17-5p	CAAAGUGCUUACAGUGCAGGUAG	UUACUUGUGUACUCUGUAAUAUUUG	..(((((.((((((((((((((.&.))))))))....))))))))))).	63	1654
ENSG00000165338	HECTD2	hsa-miR-17-5p	CAAAGUGCUUACAGUGCAGGUAG	UUACUUGUGUACUCUGUAAUAUUUG	..(((((.((((((((((((((.&.))))))))....))))))))))).	63	1589
ENSG00000166869	CHP2	hsa-miR-17-5p	CAAAGUGCUUACAGUGCAGGUAG	CUCCUGCAACCAGUAUCUCCUUG	....(((((.....((((((...&..))))))...))))).......	61	1323
ENSG00000170345	FOS	hsa-miR-17-5p	CAAAGUGCUUACAGUGCAGGUAG	CUACCUUGAGGUCUUUUG	(((((.((((.((....((((((&)))))))))))).)))))	60	92
ENSG00000176490	DIRAS1	hsa-miR-17-5p	CAAAGUGCUUACAGUGCAGGUAG	GUACCUGCAGCCAUGAGGUUCUG	...((.((((....((((((((.&.))))))))......)))).)).	64	1605
ENSG00000176490	DIRAS1	hsa-miR-17-5p	CAAAGUGCUUACAGUGCAGGUAG	CUGUCUGGGAUGAUAUGUUUUUG	...........(((.((((....&)))))))................	62	1420
ENSG00000176490	DIRAS1	hsa-miR-17-5p	CAAAGUGCUUACAGUGCAGGUAG	CUGUCCUGGCUGCUGGCCCAUCCUG	......(((..((((.(((((((&))).))))))))..)))........	60	174
ENSG00000198846	TOX	hsa-miR-17-5p	CAAAGUGCUUACAGUGCAGGUAG	AUACCAGCACUACUAAUUAACUAAUG	...(((..(((.(((((.((((.&.)))).)))))..)))...)))....	61	261
ENSG00000198846	TOX	hsa-miR-17-5p	CAAAGUGCUUACAGUGCAGGUAG	AUAUAUGCAUUGUGUAAUCCACUCAG	...((((..(((((((((.(((.&.))).))))))))).....))))...	61	504
ENSG00000198846	TOX	hsa-miR-17-5p	CAAAGUGCUUACAGUGCAGGUAG	CUAAGCACUUAGGACCAUUUG	(.(((((((((............&.))))))))).).........	61	2200
ENSG00000198961	PJA2	hsa-miR-17-5p	CAAAGUGCUUACAGUGCAGGUAG	CUGUUUGCAUCAAAUGUAAAGACUGUG	...(((..(((((((((((((((&))))))))))....)))))..)))...	73	2138
ENSG00000198961	PJA2	hsa-miR-17-5p	CAAAGUGCUUACAGUGCAGGUAG	UUAUCUGCCAGUUGUUAAGAGGUUUUG	.(((.(.(((((((.(((((((.&.)))))))...))).)))).).)))..	67	655
ENSG00000198961	PJA2	hsa-miR-17-5p	CAAAGUGCUUACAGUGCAGGUAG	CACUUGCAUUCUAAUUUUUG	(((((...(((.(((((((((..&.))))))))).))).)))))	64	1217
ENSG00000198961	PJA2	hsa-miR-17-5p	CAAAGUGCUUACAGUGCAGGUAG	CUGUUUGCAUCAAAUGUAAAGACUGUG	...(((..(((((((((((((((&))))))))))....)))))..)))...	73	2142
ENSG00000198961	PJA2	hsa-miR-17-5p	CAAAGUGCUUACAGUGCAGGUAG	UUAUCUGCCAGUUGUUAAGAGGUUUUG	.(((.(.(((((((.(((((((.&.)))))))...))).)))).).)))..	67	659
ENSG00000198961	PJA2	hsa-miR-17-5p	CAAAGUGCUUACAGUGCAGGUAG	CACUUGCAUUCUAAUUUUUG	(((((...(((.(((((((((..&.))))))))).))).)))))	64	1221
ENSG00000206579	XKR4	hsa-miR-17-5p	CAAAGUGCUUACAGUGCAGGUAG	CUGCCUCAGCAGAUUGAAAACAUUUG	(((..((((...((.((((....&)))))).))))..)))..........	74	265
ENSG00000206579	XKR4	hsa-miR-17-5p	CAAAGUGCUUACAGUGCAGGUAG	AUACUUUAAGCAUCAUAAUUACUUGG	....(((((((.((((.......&.)))).))))))).............	61	324
ENSG00000206579	XKR4	hsa-miR-17-5p	CAAAGUGCUUACAGUGCAGGUAG	CUGCCUCAGCAGAUUGAAAACAUUUG	(((..((((...((.((((....&)))))).))))..)))..........	74	16170
ENSG00000206579	XKR4	hsa-miR-17-5p	CAAAGUGCUUACAGUGCAGGUAG	CUAUCUGCAUGACAUUCUG	.............((((((((((&)))))))))).........	67	536
ENSG00000206579	XKR4	hsa-miR-17-5p	CAAAGUGCUUACAGUGCAGGUAG	CUACCUCAGCUACUGUUGUUUUAUUUAG	......((..(((((((((((((&))))))..)).))))).)).........	67	917
ENSG00000206579	XKR4	hsa-miR-17-5p	CAAAGUGCUUACAGUGCAGGUAG	CUACAGUACCAUAGUUAUUUUG	(((((((.(((..((((..((((&)))).))))..))).)))))))	64	129
ENSG00000206579	XKR4	hsa-miR-17-5p	CAAAGUGCUUACAGUGCAGGUAG	CUACCUCAUAGGGGUGUUGUG	(((...((((...(((.((((((&)))))))))..)))).)))..	63	3744
ENSG00000206579	XKR4	hsa-miR-17-5p	CAAAGUGCUUACAGUGCAGGUAG	AUAUGUGCCUUUUAAGUGUGUUUG	((((.((((((.((.(((.(((.&.))).)))))..))))))..))))	63	14096
ENSG00000206579	XKR4	hsa-miR-17-5p	CAAAGUGCUUACAGUGCAGGUAG	CUACACUGCCAUCAGACUGUUG	..........(((((((((((((&)))).))))......)))))..	62	14943
ENSG00000206579	XKR4	hsa-miR-17-5p	CAAAGUGCUUACAGUGCAGGUAG	AUACUUUAAGCAUCAUAAUUACUUGG	....(((((((.((((.......&.)))).))))))).............	61	16229
ENSG00000053254	FOXN3	hsa-miR-21-5p	UAGCUUAUCAGACUGAUGUUGA	UUAGGGUCGUCUGACCUUGGCUG	(((((..((((((.(((.((((&)))).)))))))))....)))))	63	399
ENSG00000079335	CDC14A	hsa-miR-21-5p	UAGCUUAUCAGACUGAUGUUGA	UUGACAUCAGUUUUAAAUCAA	.........(((((((((((((&)))))))))))))........	69	1045
ENSG00000079335	CDC14A	hsa-miR-21-5p	UAGCUUAUCAGACUGAUGUUGA	UUGACUCAGGUUUGUUAAAUUA	....(((.((((((((.(((((&)))))))).))))).)))....	65	584
ENSG00000100307	CBX7	hsa-miR-21-5p	UAGCUUAUCAGACUGAUGUUGA	UCAGCACAGGCUUUGAGACGUCUG	...((((..((.(((.((((((&))))))))).)).)))).......	65	2107
ENSG00000109943	CRTAM	hsa-miR-21-5p	UAGCUUAUCAGACUGAUGUUGA	UCAUUGUUGGAAUCUGAAUAAACCA	.......(((((((((((.(((&))).))))))..)))))........	62	10
ENSG00000109943	CRTAM	hsa-miR-21-5p	UAGCUUAUCAGACUGAUGUUGA	UCAUUGUUGGAAUCUGAAUAAACCA	.......(((((((((((.(((&))).))))))..)))))........	62	12
ENSG00000112245	PTP4A1	hsa-miR-21-5p	UAGCUUAUCAGACUGAUGUUGA	UUAACACAGCUCUAUACCUA	.........((((((.((((((&))))))))).))).......	61	713
ENSG00000112773	FAM46A	hsa-miR-21-5p	UAGCUUAUCAGACUGAUGUUGA	UUAACAUUUGUUGAUCUGAUA	.....((((((((.((((((((&)))))))).)....)))))))	65	2971
ENSG00000112773	FAM46A	hsa-miR-21-5p	UAGCUUAUCAGACUGAUGUUGA	UCAUCAUCAGUUAAAGAGAGACCA	...(((.((.((((((((.(((&))).))))))))...)))))....	64	1901
ENSG00000112773	FAM46A	hsa-miR-21-5p	UAGCUUAUCAGACUGAUGUUGA	UUAACAUUUGUUGAUCUGAUA	.....((((((((.((((((((&)))))))).)....)))))))	65	2971
ENSG00000112773	FAM46A	hsa-miR-21-5p	UAGCUUAUCAGACUGAUGUUGA	UCAUCAUCAGUUAAAGAGAGACCA	...(((.((.((((((((.(((&))).))))))))...)))))....	64	1901
ENSG00000112773	FAM46A	hsa-miR-21-5p	UAGCUUAUCAGACUGAUGUUGA	UUAACAUUUGUUGAUCUGAUA	.....((((((((.((((((((&)))))))).)....)))))))	65	2971
ENSG00000112773	FAM46A	hsa-miR-21-5p	UAGCUUAUCAGACUGAUGUUGA	UCAUCAUCAGUUAAAGAGAGACCA	...(((.((.((((((((.(((&))).))))))))...)))))....	64	1901
ENSG00000115525	ST3GAL5	hsa-miR-21-5p	UAGCUUAUCAGACUGAUGUUGA	CCAGUGUCUGUCUGAGGUGACUUA	..(((..((((((.(((((((.&.))))))).)))))))))......	66	216
ENSG00000115525	ST3GAL5	hsa-miR-21-5p	UAGCUUAUCAGACUGAUGUUGA	CCAGUGUCUGUCUGAGGUGACUUA	..(((..((((((.(((((((.&.))))))).)))))))))......	66	216
ENSG00000115525	ST3GAL5	hsa-miR-21-5p	UAGCUUAUCAGACUGAUGUUGA	CCAGUGUCUGUCUGAGGUGACUUA	..(((..((((((.(((((((.&.))))))).)))))))))......	66	216
ENSG00000118432	CNR1	hsa-miR-21-5p	UAGCUUAUCAGACUGAUGUUGA	UUAAUAUUUGUUUAGUUCAGCAA	..(((.((.((((.((((((((&)))))))).)))).))..)))..	62	3501
ENSG00000118432	CNR1	hsa-miR-21-5p	UAGCUUAUCAGACUGAUGUUGA	UCAUCAUCCACACGUCUGAGGAUGGGAAGGUA	...((((((((((.((((.(((&))).)))).....))))))...))))......	64	438
ENSG00000118432	CNR1	hsa-miR-21-5p	UAGCUUAUCAGACUGAUGUUGA	CCAUCAUCUAUGCUCUGAGGAGUAA	..((((.((((((.((((.((.&.)).))))...).))))).))))..	60	214
ENSG00000118432	CNR1	hsa-miR-21-5p	UAGCUUAUCAGACUGAUGUUGA	UUAAUAUUUGUUUAGUUCAGCAA	..(((.((.((((.((((((((&)))))))).)))).))..)))..	62	3489
ENSG00000118922	KLF12	hsa-miR-21-5p	UAGCUUAUCAGACUGAUGUUGA	UUAGCACAGAACUAGAUGAGUUG	(((((((((((.(((.((((((&)))))))))..)).)))))))))	65	6853
ENSG00000118922	KLF12	hsa-miR-21-5p	UAGCUUAUCAGACUGAUGUUGA	UCAACGUGUCUGUCCACGAUUUGUUG	((((..(((.(((..(((((((&)))))))....)))...)))..))))	60	1290
ENSG00000122707	RECK	hsa-miR-21-5p	UAGCUUAUCAGACUGAUGUUGA	UAAACAUCAAUCUUUAAACCA	.........(((.(((((((..&..))))))).)))........	65	598
ENSG00000132561	MATN2	hsa-miR-21-5p	UAGCUUAUCAGACUGAUGUUGA	UCAGCACAAUGGAUGAGAUA	...((((((....((.((((((&))))))))...))))))...	62	384
ENSG00000134758	RNF138	hsa-miR-21-5p	UAGCUUAUCAGACUGAUGUUGA	UCACCGUUACAGUAACUUGAUGUGUAUA	..((.(((((((((((((.(((&))).)))..))))...)))))).))...	60	21
ENSG00000134758	RNF138	hsa-miR-21-5p	UAGCUUAUCAGACUGAUGUUGA	UCAUCUCAGUUUAGAAAUUUA	.......(((((((((.(.(((&))).)))))))).))......	62	1503
ENSG00000134758	RNF138	hsa-miR-21-5p	UAGCUUAUCAGACUGAUGUUGA	UCACCGUUACAGUAACUUGAUGUGUAUA	..((.(((((((((((((.(((&))).)))..))))...)))))).))...	60	2280
ENSG00000136826	KLF4	hsa-miR-21-5p	UAGCUUAUCAGACUGAUGUUGA	UCAACAUUUAUGACCUAAGUCA	..((((((((....((((((((&))))))))..)))..)))))..	64	293
ENSG00000136826	KLF4	hsa-miR-21-5p	UAGCUUAUCAGACUGAUGUUGA	UCAACAUUUAUGACCUAAGUCA	..((((((((....((((((((&))))))))..)))..)))))..	64	295
ENSG00000138639	ARHGAP24	hsa-miR-21-5p	UAGCUUAUCAGACUGAUGUUGA	UUAACAUUUGUUUGUACAUGUAUA	........(((((.((((((((&)))))))).)))))..........	62	1730
ENSG00000138735	PDE5A	hsa-miR-21-5p	UAGCUUAUCAGACUGAUGUUGA	UCAGCUUCACUUGCAGAUCACUA	........(((..(((.(((((&))))).))).)))..........	63	1385
ENSG00000138735	PDE5A	hsa-miR-21-5p	UAGCUUAUCAGACUGAUGUUGA	UUAACCUCUGUGUGCCUAAACAA	........((.((.((.(((((&))))).)).)).)).........	60	1613
ENSG00000138735	PDE5A	hsa-miR-21-5p	UAGCUUAUCAGACUGAUGUUGA	UCAGCUUCACUUGCAGAUCACUA	........(((..(((.(((((&))))).))).)))..........	63	1387
ENSG00000138735	PDE5A	hsa-miR-21-5p	UAGCUUAUCAGACUGAUGUUGA	UUAACCUCUGUGUGCCUAAACAA	........((.((.((.(((((&))))).)).)).)).........	60	1615
ENSG00000145012	LPP	hsa-miR-21-5p	UAGCUUAUCAGACUGAUGUUGA	UCACCAUGAGUCAGGCUAGGUUG	(((((((((.((((.(((.(((&))).))).)))).)).)))))))	74	9185
ENSG00000145012	LPP	hsa-miR-21-5p	UAGCUUAUCAGACUGAUGUUGA	UCAUCAUCAUUGGAUGAAUCCA	....(((((.((.(((((.(((&))).))))))).))))).....	63	882
ENSG00000145012	LPP	hsa-miR-21-5p	UAGCUUAUCAGACUGAUGUUGA	UCAACCAGCUGGCAGAUUA	.......((((.(((..(((((&)))))))))))).......	61	1228
ENSG00000145012	LPP	hsa-miR-21-5p	UAGCUUAUCAGACUGAUGUUGA	GCAACCAUCAGAAUUCAGAAUCUA	............(((((((((.&.))).)))))).............	60	15569
ENSG00000145012	LPP	hsa-miR-21-5p	UAGCUUAUCAGACUGAUGUUGA	UCACCAUGAGUCAGGCUAGGUUG	(((((((((.((((.(((.(((&))).))).)))).)).)))))))	74	9185
ENSG00000145012	LPP	hsa-miR-21-5p	UAGCUUAUCAGACUGAUGUUGA	UCAUCAUCAUUGGAUGAAUCCA	....(((((.((.(((((.(((&))).))))))).))))).....	63	882
ENSG00000145012	LPP	hsa-miR-21-5p	UAGCUUAUCAGACUGAUGUUGA	UCAACCAGCUGGCAGAUUA	.......((((.(((..(((((&)))))))))))).......	61	1228
ENSG00000145012	LPP	hsa-miR-21-5p	UAGCUUAUCAGACUGAUGUUGA	GCAACCAUCAGAAUUCAGAAUCUA	............(((((((((.&.))).)))))).............	60	15569
ENSG00000145012	LPP	hsa-miR-21-5p	UAGCUUAUCAGACUGAUGUUGA	UCACCAUGAGUCAGGCUAGGUUG	(((((((((.((((.(((.(((&))).))).)))).)).)))))))	74	9185
ENSG00000145012	LPP	hsa-miR-21-5p	UAGCUUAUCAGACUGAUGUUGA	UCAUCAUCAUUGGAUGAAUCCA	....(((((.((.(((((.(((&))).))))))).))))).....	63	882
ENSG00000145012	LPP	hsa-miR-21-5p	UAGCUUAUCAGACUGAUGUUGA	UCAACCAGCUGGCAGAUUA	.......((((.(((..(((((&)))))))))))).......	61	1228
ENSG00000145012	LPP	hsa-miR-21-5p	UAGCUUAUCAGACUGAUGUUGA	GCAACCAUCAGAAUUCAGAAUCUA	............(((((((((.&.))).)))))).............	60	15569
ENSG00000145349	CAMK2D	hsa-miR-21-5p	UAGCUUAUCAGACUGAUGUUGA	UCAACUUCAGAAUACAGUAGAGUUA	((((((......((((.(((((&))))).)))).........))))))	66	33
ENSG00000147459	DOCK5	hsa-miR-21-5p	UAGCUUAUCAGACUGAUGUUGA	UCAGCCUGAGGUUGUUAACCCA	((((...((((.((((......&)))).))))....)))).....	64	2369
ENSG00000147459	DOCK5	hsa-miR-21-5p	UAGCUUAUCAGACUGAUGUUGA	UGAACUUCAGCUCUGGAACAAUUA	.......(((((((((.(((..&..))).)))).)))))........	64	3529
ENSG00000147526	TACC1	hsa-miR-21-5p	UAGCUUAUCAGACUGAUGUUGA	UCACAUCAUUAACUGCUAAUUCUG	((((.........((((((...&..))))))......))))......	63	513
ENSG00000147526	TACC1	hsa-miR-21-5p	UAGCUUAUCAGACUGAUGUUGA	UCACAUCAUUAACUGCUAAUUCUG	((((.........((((((...&..))))))......))))......	63	513
ENSG00000151090	THRB	hsa-miR-21-5p	UAGCUUAUCAGACUGAUGUUGA	CCAAUAUCAUUUUUAUAACGUUA	((((((((.(((.((((((((.&.)))))))).))).)))).))))	72	4069
ENSG00000151090	THRB	hsa-miR-21-5p	UAGCUUAUCAGACUGAUGUUGA	CCAAUAUCAUUUUUAUAACGUUA	((((((((.(((.((((((((.&.)))))))).))).)))).))))	72	5119
ENSG00000151090	THRB	hsa-miR-21-5p	UAGCUUAUCAGACUGAUGUUGA	UUAACAUCAGCUGCCAACAUA	........(((.((((((((((&)))))))))))))........	71	706
ENSG00000151090	THRB	hsa-miR-21-5p	UAGCUUAUCAGACUGAUGUUGA	CCAAUAUCAUUUUUAUAACGUUA	((((((((.(((.((((((((.&.)))))))).))).)))).))))	72	71
ENSG00000166292	TMEM100	hsa-miR-21-5p	UAGCUUAUCAGACUGAUGUUGA	UUAAUAUUUGUUUAGUUCAGCAA	..(((.((.((((.((((((((&)))))))).)))).))..)))..	62	121
ENSG00000170345	FOS	hsa-miR-21-5p	UAGCUUAUCAGACUGAUGUUGA	UCAACAUCAAUGUUCAUUGUAAUGUUA	((((((((..((((((((((((&)))))))))..)))....)))).))))	72	240
ENSG00000170345	FOS	hsa-miR-21-5p	UAGCUUAUCAGACUGAUGUUGA	CCAAUAUUAUACUAAGAAAAGAUA	...(((.((((..((((((((.&.))))))))..))..)).)))...	60	326
ENSG00000171044	XKR6	hsa-miR-21-5p	UAGCUUAUCAGACUGAUGUUGA	UCAACAUCAUUUGAUACUA	.....(((((((.(((((((((&))))))))))))))))...	83	326
ENSG00000182836	PLCXD3	hsa-miR-21-5p	UAGCUUAUCAGACUGAUGUUGA	UUAACUUCAUUUUCAUACAGACUA	((((((((.(((.(((.(((((&))))).))).))).))).)).)))	70	1878
ENSG00000182836	PLCXD3	hsa-miR-21-5p	UAGCUUAUCAGACUGAUGUUGA	UCAAAAUUAGUCUUUGUAACAUA	.........((((((((.((((&)))).))))))))..........	68	6379
ENSG00000182836	PLCXD3	hsa-miR-21-5p	UAGCUUAUCAGACUGAUGUUGA	UUAACUUCAUUUUCAUACAGACUA	((((((((.(((.(((.(((((&))))).))).))).))).)).)))	70	1875
ENSG00000182836	PLCXD3	hsa-miR-21-5p	UAGCUUAUCAGACUGAUGUUGA	UCAAAAUUAGUCUUUGUAACAUA	.........((((((((.((((&)))).))))))))..........	68	6186
ENSG00000198961	PJA2	hsa-miR-21-5p	UAGCUUAUCAGACUGAUGUUGA	UAAUCAUCUGUGUGGCAUACGUUA	..(((...((((.((((.....&..))))))))...)))........	66	2213
ENSG00000198961	PJA2	hsa-miR-21-5p	UAGCUUAUCAGACUGAUGUUGA	UAAUCAUCUGUGUGGCAUACGUUA	..(((...((((.((((.....&..))))))))...)))........	66	2217
ENSG00000206579	XKR4	hsa-miR-21-5p	UAGCUUAUCAGACUGAUGUUGA	ACAGAAUCAUGGUCUGAUGAUCAA	....(((((((((((((.(((.&.))).)))..))))))))))....	66	12286
ENSG00000206579	XKR4	hsa-miR-21-5p	UAGCUUAUCAGACUGAUGUUGA	ACAACAUCAUCACUGUGAGUCCUA	..(((((.(((..((((((((.&.))))))))...))))))))....	60	4251
ENSG00000206579	XKR4	hsa-miR-21-5p	UAGCUUAUCAGACUGAUGUUGA	UCAACUAUCUGCAUGACAUUCUG	.......(((..(.((((((((&))))).))).)..))).......	62	536
ENSG00000206579	XKR4	hsa-miR-21-5p	UAGCUUAUCAGACUGAUGUUGA	UUGACAUAUGUCUUAUCUAGUUG	(((((.((.((((..(((((((&)))))))..)))).))..)))))	62	13031
ENSG00000053254	FOXN3	hsa-miR-223-3p	UGUCAGUUUGUCAAAUACCCCA	UGGUGUAUUUUUAAGAUUAAAGGUACA	....(((((...((((((.(((&))).))))))...))))).........	64	5154
ENSG00000065559	MAP2K4	hsa-miR-223-3p	UGUCAGUUUGUCAAAUACCCCA	UGGUGUUUUGUCAGACUUCCA	....((((((.((((((((...&.)))).)))).))))))....	75	2203
ENSG00000065559	MAP2K4	hsa-miR-223-3p	UGUCAGUUUGUCAAAUACCCCA	UGGUGUUUUGUCAGACUUCCA	....((((((.((((((((...&.)))).)))).))))))....	75	2196
ENSG00000101745	ANKRD12	hsa-miR-223-3p	UGUCAGUUUGUCAAAUACCCCA	UGGAGUAUAUGCCUGAAA	..((((...(.((.((((.(((&))).)))).)))))))..	60	191
ENSG00000104332	SFRP1	hsa-miR-223-3p	UGUCAGUUUGUCAAAUACCCCA	UGGGAUUUGUAAAGCUUUACA	....(((((..(((((.(((..&.))))))))..))))).....	66	670
ENSG00000104332	SFRP1	hsa-miR-223-3p	UGUCAGUUUGUCAAAUACCCCA	UGGGAUUUGUAAAGCUUUACA	....(((((..(((((.(((..&.))))))))..))))).....	66	676
ENSG00000112245	PTP4A1	hsa-miR-223-3p	UGUCAGUUUGUCAAAUACCCCA	UGGAUUAUUUGUGAUAGUAAUCACA	(((((......((((((..(((&)))..))))))))))).........	60	1427
ENSG00000118922	KLF12	hsa-miR-223-3p	UGUCAGUUUGUCAAAUACCCCA	UGGGGAUAUGUGCAUGGUUGGGA	..((((..((.((.((((((((&))))).))).))))...))))..	63	6343
ENSG00000118922	KLF12	hsa-miR-223-3p	UGUCAGUUUGUCAAAUACCCCA	UGGGGUGGCAAUCAAACG	.....(((((.....(((((((&))))))).....))))).	60	2305
ENSG00000134758	RNF138	hsa-miR-223-3p	UGUCAGUUUGUCAAAUACCCCA	UGGAGAAUUUGUGAAUCUUCA	.....(((((.(((((.(.(((&))).).)))))))))).....	61	176
ENSG00000145012	LPP	hsa-miR-223-3p	UGUCAGUUUGUCAAAUACCCCA	UGGAGUAUUUUAAGUCUACA	(((.((((((..((((((.(((&))).)))))))))).)))))	66	14693
ENSG00000145012	LPP	hsa-miR-223-3p	UGUCAGUUUGUCAAAUACCCCA	UGGUGUUUACAAGUGGAUA	((((..(((((.(((((((...&.))))))))))))..))))	61	557
ENSG00000145012	LPP	hsa-miR-223-3p	UGUCAGUUUGUCAAAUACCCCA	UGGAGUAUUUUAAGUCUACA	(((.((((((..((((((.(((&))).)))))))))).)))))	66	14693
ENSG00000145012	LPP	hsa-miR-223-3p	UGUCAGUUUGUCAAAUACCCCA	UGGUGUUUACAAGUGGAUA	((((..(((((.(((((((...&.))))))))))))..))))	61	557
ENSG00000145012	LPP	hsa-miR-223-3p	UGUCAGUUUGUCAAAUACCCCA	UGGAGUAUUUUAAGUCUACA	(((.((((((..((((((.(((&))).)))))))))).)))))	66	14693
ENSG00000145012	LPP	hsa-miR-223-3p	UGUCAGUUUGUCAAAUACCCCA	UGGUGUUUACAAGUGGAUA	((((..(((((.(((((((...&.))))))))))))..))))	61	557
ENSG00000147459	DOCK5	hsa-miR-223-3p	UGUCAGUUUGUCAAAUACCCCA	UGGUGGUCUGCACAAGCCUGGACA	((((.((((((((...((((((&))).))).)).))))))...))))	65	636
ENSG00000147459	DOCK5	hsa-miR-223-3p	UGUCAGUUUGUCAAAUACCCCA	UGGAGGUGCUGGACAGGAAGGAUG	.(((..((((((...(((((((&))).))))...))))))...))).	60	3914
ENSG00000147459	DOCK5	hsa-miR-223-3p	UGUCAGUUUGUCAAAUACCCCA	UGGAGUAUUGAAAGACAUUGAAA	..(((((((.((((.(((.(((&))).))))))).))))..)))..	65	1666
ENSG00000147459	DOCK5	hsa-miR-223-3p	UGUCAGUUUGUCAAAUACCCCA	UGGUGGUCUGCACAAGCCUGGACA	((((.((((((((...((((((&))).))).)).))))))...))))	65	4096
ENSG00000147526	TACC1	hsa-miR-223-3p	UGUCAGUUUGUCAAAUACCCCA	UGGGGAAUGCAACGUGAGGCCAACUGAACA	..((((((.(((..((.(((((&))))).)).........))).))))))...	70	2044
ENSG00000147526	TACC1	hsa-miR-223-3p	UGUCAGUUUGUCAAAUACCCCA	UGGGGAAUGCAACGUGAGGCCAACUGAACA	..((((((.(((..((.(((((&))))).)).........))).))))))...	70	2044
ENSG00000151090	THRB	hsa-miR-223-3p	UGUCAGUUUGUCAAAUACCCCA	UGGGCGUAGAUAAACUCAUA	....((((((((...(((((((&)))).)))))))))))....	71	40
ENSG00000151090	THRB	hsa-miR-223-3p	UGUCAGUUUGUCAAAUACCCCA	UGGGCGUAGAUAAACUCAUA	....((((((((...(((((((&)))).)))))))))))....	71	1090
ENSG00000166869	CHP2	hsa-miR-223-3p	UGUCAGUUUGUCAAAUACCCCA	UGGGAGUGAUGGGAGACAGUGACA	(((((((((.(((..(((((((&)))).))).))).))))..)))))	68	963
ENSG00000182836	PLCXD3	hsa-miR-223-3p	UGUCAGUUUGUCAAAUACCCCA	UGGGAAUUUGCAGAGCUGGUGACA	..(((((((..(((((.(((..&.))).)))))..))))))).....	68	222
ENSG00000182836	PLCXD3	hsa-miR-223-3p	UGUCAGUUUGUCAAAUACCCCA	UGGGAAUUUGCAGAGCUGGUGACA	..(((((((..(((((.(((..&.))).)))))..))))))).....	68	219
ENSG00000206579	XKR4	hsa-miR-223-3p	UGUCAGUUUGUCAAAUACCCCA	UGGAGUAUUUGAUGUACUACA	(((.(((.((((((((((.(((&))).)))))))))).))))))	85	146
ENSG00000206579	XKR4	hsa-miR-223-3p	UGUCAGUUUGUCAAAUACCCCA	UGGUGAAUUUUAUAAGGUUGAUA	(((((.(((((.((((.(.(((&))).).)))).)))))..)))))	70	4978
ENSG00000206579	XKR4	hsa-miR-223-3p	UGUCAGUUUGUCAAAUACCCCA	UGGAGGUGAUUUGCAGUUAAUUAAUUCA	.......(((.(((((((((((&))).))).))))))))............	61	8346
ENSG00000053254	FOXN3	hsa-miR-224-5p	CAAGUCACUAGUGGUUCCGUU	UAUGGAACCUGAGCGACACCUUG	...(((.((...((((((((.&.))))))))..)).)))......	64	3586
ENSG00000147459	DOCK5	hsa-miR-224-5p	CAAGUCACUAGUGGUUCCGUU	GAUGGAAUCGCGGCCACUCCUG	..(((..((.(((((((((((&)))))))))))))..)))....	60	1125
ENSG00000165338	HECTD2	hsa-miR-224-5p	CAAGUCACUAGUGGUUCCGUU	AACUAGUUACUUGUGUACUCUG	(((((.((((((.........&.)))))).))))).........	60	1666
ENSG00000165338	HECTD2	hsa-miR-224-5p	CAAGUCACUAGUGGUUCCGUU	AACUAGUUACUUGUGUACUCUG	(((((.((((((.........&.)))))).))))).........	60	1663
ENSG00000165338	HECTD2	hsa-miR-224-5p	CAAGUCACUAGUGGUUCCGUU	AACUAGUUACUUGUGUACUCUG	(((((.((((((.........&.)))))).))))).........	60	1598
ENSG00000206579	XKR4	hsa-miR-224-5p	CAAGUCACUAGUGGUUCCGUU	GACAAAACCACUGGACCAUUG	.......(((((((((..(((&)))..))))))))).......	65	5759
ENSG00000206579	XKR4	hsa-miR-224-5p	CAAGUCACUAGUGGUUCCGUU	AAUGGAAGUCUCUAUCACCUG	........(((.((((((((.&.)))))).)).))).......	64	12187
ENSG00000206579	XKR4	hsa-miR-224-5p	CAAGUCACUAGUGGUUCCGUU	AACUGAGCCCUAAUCCCUGG	........(((.(((((.((.&.)).))))))))........	62	3838
ENSG00000206579	XKR4	hsa-miR-224-5p	CAAGUCACUAGUGGUUCCGUU	UAUGGGAUCGCUGUCAUAUG	........((((((((((((.&.)))))))))))).......	60	10653
ENSG00000053254	FOXN3	hsa-miR-25-3p	CAUUGCACUUGUCUCGGUCUGA	ACAGCCGAAACCGAUGUGUCUAUG	....(((((((..((((.(((.&.)))))))...))).)))).....	65	1056
ENSG00000053254	FOXN3	hsa-miR-25-3p	CAUUGCACUUGUCUCGGUCUGA	CCAGGACGAGGUAAUGUCAGAG	((((((.(((((((.((.....&)).)))))))))))))......	65	3845
ENSG00000079335	CDC14A	hsa-miR-25-3p	CAUUGCACUUGUCUCGGUCUGA	UCAUCUGGACGAGCAGUG	((((((..(((((.(((..(((&))).))))))))))))))	60	1931
ENSG00000099864	PALM	hsa-miR-25-3p	CAUUGCACUUGUCUCGGUCUGA	UCAGGCCCUGGAAGUGAGGCUCUAUG	.....(((((.((..(((((((&)))))))..)))))))..........	61	1037
ENSG00000099864	PALM	hsa-miR-25-3p	CAUUGCACUUGUCUCGGUCUGA	UCAGGCCCUGGAAGUGAGGCUCUAUG	.....(((((.((..(((((((&)))))))..)))))))..........	61	1036
ENSG00000099864	PALM	hsa-miR-25-3p	CAUUGCACUUGUCUCGGUCUGA	UCAGGCCCUGGAAGUGAGGCUCUAUG	.....(((((.((..(((((((&)))))))..)))))))..........	61	1036
ENSG00000099864	PALM	hsa-miR-25-3p	CAUUGCACUUGUCUCGGUCUGA	UCAGGCCCUGGAAGUGAGGCUCUAUG	.....(((((.((..(((((((&)))))))..)))))))..........	61	1036
ENSG00000101745	ANKRD12	hsa-miR-25-3p	CAUUGCACUUGUCUCGGUCUGA	UUAGACUUAGUCAUACAAAG	..(((....((.((.(((((((&))))))).)).))..)))..	62	1734
ENSG00000104332	SFRP1	hsa-miR-25-3p	CAUUGCACUUGUCUCGGUCUGA	UCAACUAGAAAAUUCUAAUG	(((((......(((.(((.(((&)))))))))......)))))	60	2776
ENSG00000104332	SFRP1	hsa-miR-25-3p	CAUUGCACUUGUCUCGGUCUGA	UCAACUAGAAAAUUCUAAUG	(((((......(((.(((.(((&)))))))))......)))))	60	2782
ENSG00000115525	ST3GAL5	hsa-miR-25-3p	CAUUGCACUUGUCUCGGUCUGA	UUAGAUCUAACGUGUUCCAGUG	(((((.((.(((...(((((((&)))))))..))).))..)))))	61	234
ENSG00000115525	ST3GAL5	hsa-miR-25-3p	CAUUGCACUUGUCUCGGUCUGA	UUAGAUCUAACGUGUUCCAGUG	(((((.((.(((...(((((((&)))))))..))).))..)))))	61	234
ENSG00000115525	ST3GAL5	hsa-miR-25-3p	CAUUGCACUUGUCUCGGUCUGA	UUAGAUCUAACGUGUUCCAGUG	(((((.((.(((...(((((((&)))))))..))).))..)))))	61	234
ENSG00000118922	KLF12	hsa-miR-25-3p	CAUUGCACUUGUCUCGGUCUGA	CCAGACUGAGAUGGUAAGUUAACUG	..((((.(..(((((((((((.&.))))))))))))))))........	72	6760
ENSG00000118922	KLF12	hsa-miR-25-3p	CAUUGCACUUGUCUCGGUCUGA	UUAGACUGAGAUUUCUAAUG	(((((.....((((((((((((&))))))))))))...)))))	68	6051
ENSG00000132561	MATN2	hsa-miR-25-3p	CAUUGCACUUGUCUCGGUCUGA	UCAGUACUGAGAAACCUGGUUUG	.....((....(((((((((((&)))).)))))))....)).....	64	361
ENSG00000132561	MATN2	hsa-miR-25-3p	CAUUGCACUUGUCUCGGUCUGA	UCAGUACUGAGAAACCUGGUUUG	.....((....(((((((((((&)))).)))))))....)).....	64	363
ENSG00000132561	MATN2	hsa-miR-25-3p	CAUUGCACUUGUCUCGGUCUGA	UCAGUACUGAGAAACCUGGUUUG	.....((....(((((((((((&)))).)))))))....)).....	64	365
ENSG00000132561	MATN2	hsa-miR-25-3p	CAUUGCACUUGUCUCGGUCUGA	UCAGUACUGAGAAACCUGGUUUG	.....((....(((((((((((&)))).)))))))....)).....	64	129
ENSG00000132561	MATN2	hsa-miR-25-3p	CAUUGCACUUGUCUCGGUCUGA	UCAGUACUGAGAAACCUGGUUUG	.....((....(((((((((((&)))).)))))))....)).....	64	365
ENSG00000132561	MATN2	hsa-miR-25-3p	CAUUGCACUUGUCUCGGUCUGA	UCAGUACUGAGAAACCUGGUUUG	.....((....(((((((((((&)))).)))))))....)).....	64	867
ENSG00000136011	STAB2	hsa-miR-25-3p	CAUUGCACUUGUCUCGGUCUGA	CCAGUGCCUGACACAGGAACUGUG	.......(((((.((((((((.&.))).))).)).))))).......	60	38
ENSG00000136826	KLF4	hsa-miR-25-3p	CAUUGCACUUGUCUCGGUCUGA	UCAGAUGUGCAAUAAUUUGUACAAUG	.(((((((........((((((&))))))))))))).............	60	204
ENSG00000136826	KLF4	hsa-miR-25-3p	CAUUGCACUUGUCUCGGUCUGA	UCAGAUGUGCAAUAAUUUGUACAAUG	.(((((((........((((((&))))))))))))).............	60	206
ENSG00000145012	LPP	hsa-miR-25-3p	CAUUGCACUUGUCUCGGUCUGA	ACAGACCGUUCUGACAGUUGUUGUG	(((.(((.(((((.(((((((.&.)))))))....))))).))).)))	72	7312
ENSG00000145012	LPP	hsa-miR-25-3p	CAUUGCACUUGUCUCGGUCUGA	UCACACCUGAUAAGUGUUUUAUG	....(((((((((..(((.(((&))).))).)))))))))......	69	5389
ENSG00000145012	LPP	hsa-miR-25-3p	CAUUGCACUUGUCUCGGUCUGA	UUAGACCUGAAACCUUUACAGUUGGAUG	.((((.....((.(((((((((&))))))).)).)).....))))......	62	2579
ENSG00000145012	LPP	hsa-miR-25-3p	CAUUGCACUUGUCUCGGUCUGA	UCAGGCUGAAUGGGAAGAAAAAGG	.......(((.(((((((((((&)))))))))..)).))).......	62	8268
ENSG00000145012	LPP	hsa-miR-25-3p	CAUUGCACUUGUCUCGGUCUGA	ACAGACCGUUCUGACAGUUGUUGUG	(((.(((.(((((.(((((((.&.)))))))....))))).))).)))	72	7312
ENSG00000145012	LPP	hsa-miR-25-3p	CAUUGCACUUGUCUCGGUCUGA	UCACACCUGAUAAGUGUUUUAUG	....(((((((((..(((.(((&))).))).)))))))))......	69	5389
ENSG00000145012	LPP	hsa-miR-25-3p	CAUUGCACUUGUCUCGGUCUGA	UUAGACCUGAAACCUUUACAGUUGGAUG	.((((.....((.(((((((((&))))))).)).)).....))))......	62	2579
ENSG00000145012	LPP	hsa-miR-25-3p	CAUUGCACUUGUCUCGGUCUGA	UCAGGCUGAAUGGGAAGAAAAAGG	.......(((.(((((((((((&)))))))))..)).))).......	62	8268
ENSG00000145012	LPP	hsa-miR-25-3p	CAUUGCACUUGUCUCGGUCUGA	ACAGACCGUUCUGACAGUUGUUGUG	(((.(((.(((((.(((((((.&.)))))))....))))).))).)))	72	7312
ENSG00000145012	LPP	hsa-miR-25-3p	CAUUGCACUUGUCUCGGUCUGA	UCACACCUGAUAAGUGUUUUAUG	....(((((((((..(((.(((&))).))).)))))))))......	69	5389
ENSG00000145012	LPP	hsa-miR-25-3p	CAUUGCACUUGUCUCGGUCUGA	UUAGACCUGAAACCUUUACAGUUGGAUG	.((((.....((.(((((((((&))))))).)).)).....))))......	62	2579
ENSG00000145012	LPP	hsa-miR-25-3p	CAUUGCACUUGUCUCGGUCUGA	UCAGGCUGAAUGGGAAGAAAAAGG	.......(((.(((((((((((&)))))))))..)).))).......	62	8268
ENSG00000145012	LPP	hsa-miR-25-3p	CAUUGCACUUGUCUCGGUCUGA	UUAGCACUGUGUUGGGUGUGACUG	..((((((((..(.((((((((&)))).)))).)..))))))))...	64	398
ENSG00000145335	SNCA	hsa-miR-25-3p	CAUUGCACUUGUCUCGGUCUGA	UCUAGACUGAUAAAAAUUUCAUG	.............((((((((.&..)))))))).............	64	1158
ENSG00000145335	SNCA	hsa-miR-25-3p	CAUUGCACUUGUCUCGGUCUGA	UCUAGACUGAUAAAAAUUUCAUG	.............((((((((.&..)))))))).............	64	1131
ENSG00000145335	SNCA	hsa-miR-25-3p	CAUUGCACUUGUCUCGGUCUGA	UCUAGACUGAUAAAAAUUUCAUG	.............((((((((.&..)))))))).............	64	1137
ENSG00000145335	SNCA	hsa-miR-25-3p	CAUUGCACUUGUCUCGGUCUGA	UCUAGACUGAUAAAAAUUUCAUG	.............((((((((.&..)))))))).............	64	1137
ENSG00000145349	CAMK2D	hsa-miR-25-3p	CAUUGCACUUGUCUCGGUCUGA	UUAGACAGGACGAGAGACUACG	.......(((((((..((((((&)))))).)))))))........	67	482
ENSG00000145423	SFRP2	hsa-miR-25-3p	CAUUGCACUUGUCUCGGUCUGA	CCAGACUGAGACUCAGUGUCUAAG	....(((((.(((((((((((.&.)))))))))))..))))).....	78	349
ENSG00000147459	DOCK5	hsa-miR-25-3p	CAUUGCACUUGUCUCGGUCUGA	UCAACCGGACAGUGAUUGGGAUG	.....((((.(((.((((.(((&)))))))))))))).........	62	3837
ENSG00000147459	DOCK5	hsa-miR-25-3p	CAUUGCACUUGUCUCGGUCUGA	UCAGAAGGACAGUUACUAUG	......(((.((((...(((((&))))).))))))).......	62	2836
ENSG00000147459	DOCK5	hsa-miR-25-3p	CAUUGCACUUGUCUCGGUCUGA	UUAGGCUGCAGGGGAGUUCUG	......((((.(((((((((((&)))))))).))).))))....	60	547
ENSG00000147459	DOCK5	hsa-miR-25-3p	CAUUGCACUUGUCUCGGUCUGA	UCAGCACCCCAGAAAGUUCCCACAUG	......((((.(((.(((((((&)))).)))..))))))).........	63	984
ENSG00000165338	HECTD2	hsa-miR-25-3p	CAUUGCACUUGUCUCGGUCUGA	UCAGACCUAAAUAAUCAUUG	........((((...(((((((&)))))))...))))......	68	1592
ENSG00000165338	HECTD2	hsa-miR-25-3p	CAUUGCACUUGUCUCGGUCUGA	UCAGACCUAAAUAAUCAUUG	........((((...(((((((&)))))))...))))......	68	1589
ENSG00000165338	HECTD2	hsa-miR-25-3p	CAUUGCACUUGUCUCGGUCUGA	UCAGACCUAAAUAAUCAUUG	........((((...(((((((&)))))))...))))......	68	1524
ENSG00000169946	ZFPM2	hsa-miR-25-3p	CAUUGCACUUGUCUCGGUCUGA	UCAGGAGAUAAUUCAUUAUG	........(((((((...((((&))))))))))).........	60	215
ENSG00000169946	ZFPM2	hsa-miR-25-3p	CAUUGCACUUGUCUCGGUCUGA	UCAGGAGAUAAUUCAUUAUG	........(((((((...((((&))))))))))).........	60	877
ENSG00000171044	XKR6	hsa-miR-25-3p	CAUUGCACUUGUCUCGGUCUGA	UCAGCCUGAAAUGAGGUUGUUUUG	....((.(((((.((((.((((&)))).)))).))))))).......	60	422
ENSG00000172915	NBEA	hsa-miR-25-3p	CAUUGCACUUGUCUCGGUCUGA	UCACACCCAGCAAUAGCUGUACAUUG	....((..(((.((.(((.(((&))).))).)))))..)).........	63	1604
ENSG00000172915	NBEA	hsa-miR-25-3p	CAUUGCACUUGUCUCGGUCUGA	UCACACCCAGCAAUAGCUGUACAUUG	....((..(((.((.(((.(((&))).))).)))))..)).........	63	1605
ENSG00000172915	NBEA	hsa-miR-25-3p	CAUUGCACUUGUCUCGGUCUGA	UCACACCCAGCAAUAGCUGUACAUUG	....((..(((.((.(((.(((&))).))).)))))..)).........	63	1604
ENSG00000172915	NBEA	hsa-miR-25-3p	CAUUGCACUUGUCUCGGUCUGA	UCACACCCAGCAAUAGCUGUACAUUG	....((..(((.((.(((.(((&))).))).)))))..)).........	63	1604
ENSG00000172915	NBEA	hsa-miR-25-3p	CAUUGCACUUGUCUCGGUCUGA	UCACACCCAGCAAUAGCUGUACAUUG	....((..(((.((.(((.(((&))).))).)))))..)).........	63	1604
ENSG00000182836	PLCXD3	hsa-miR-25-3p	CAUUGCACUUGUCUCGGUCUGA	GCAGAGAGACUCGUCAAAG	..(((.((..(((((..((((.&.)))))))))..)))))..	61	582
ENSG00000182836	PLCXD3	hsa-miR-25-3p	CAUUGCACUUGUCUCGGUCUGA	GCAGAGAGACUCGUCAAAG	..(((.((..(((((..((((.&.)))))))))..)))))..	61	579
ENSG00000206579	XKR4	hsa-miR-25-3p	CAUUGCACUUGUCUCGGUCUGA	UCAGAUUUAAAGAGACAUCAUCAGUGUACAAAG	(((((....(((((((((((((&)))))))....))))))....))))).......	66	14851
ENSG00000206579	XKR4	hsa-miR-25-3p	CAUUGCACUUGUCUCGGUCUGA	CCAAACCGAGAUCCAUUUCUAUG	..........((((((((.((.&.)).))))))))...........	70	7768
ENSG00000206579	XKR4	hsa-miR-25-3p	CAUUGCACUUGUCUCGGUCUGA	UUAGAGCUGGACAACCCUUUGAAAUG	((..(...((((((.(.(((((&))))).).))))))..)..)).....	62	2083
ENSG00000206579	XKR4	hsa-miR-25-3p	CAUUGCACUUGUCUCGGUCUGA	UUGGACCAGACAAAAUG	........((((((.(((((((&)))))))))))))....	67	9725
ENSG00000206579	XKR4	hsa-miR-25-3p	CAUUGCACUUGUCUCGGUCUGA	UCAGACCAGUUUUCUUUAAGAGCACUUAUG	...(((.((((.((.(((((((&))))))))).......)))).)))......	65	4563
ENSG00000206579	XKR4	hsa-miR-25-3p	CAUUGCACUUGUCUCGGUCUGA	UCAGACCACUGAAGUUGUUGUG	(((.((((((.....(((((((&)))))))....))).))).)))	63	13054
ENSG00000206579	XKR4	hsa-miR-25-3p	CAUUGCACUUGUCUCGGUCUGA	UCAGAACAAAGACAGCAACCAAUG	(((((...((((((..((((((&)))).))..))))))....)))))	64	1407
ENSG00000206579	XKR4	hsa-miR-25-3p	CAUUGCACUUGUCUCGGUCUGA	UCAGUGACAGAUGCAGAUCAACG	..(((((.(((((.....((((&)))).))))).))))).......	61	13317
ENSG00000053254	FOXN3	hsa-miR-29a-3p	UAGCACCAUCUGAAAUCGGUUA	UAACCAGUUUCAUGCUGUGUCA	..((((....((((((.(((((&))))).))))))....))))..	69	616
ENSG00000104332	SFRP1	hsa-miR-29a-3p	UAGCACCAUCUGAAAUCGGUUA	UAACUGCAUUUUACCAGAUGUUUUGAUG	......((((((((((((((((&)))))).))))...))))))........	62	102
ENSG00000104332	SFRP1	hsa-miR-29a-3p	UAGCACCAUCUGAAAUCGGUUA	UAACUGCAUUUUACCAGAUGUUUUGAUG	......((((((((((((((((&)))))).))))...))))))........	62	108
ENSG00000138639	ARHGAP24	hsa-miR-29a-3p	UAGCACCAUCUGAAAUCGGUUA	UGGCCUAUUUCAUGCAGAGUUG	..(((.....((((((.(((((&))))).))))))))).......	60	37
ENSG00000138735	PDE5A	hsa-miR-29a-3p	UAGCACCAUCUGAAAUCGGUUA	UGGCCUAUUUCAUGCAGAGUUG	..(((.....((((((.(((((&))))).))))))))).......	60	4181
ENSG00000138735	PDE5A	hsa-miR-29a-3p	UAGCACCAUCUGAAAUCGGUUA	UGGCCUAUUUCAUGCAGAGUUG	..(((.....((((((.(((((&))))).))))))))).......	60	4183
ENSG00000145012	LPP	hsa-miR-29a-3p	UAGCACCAUCUGAAAUCGGUUA	UAACCAUUUGAGAAUUUGGAAAAAUGGCUA	.....((((((.((((.(((((&))))))))).)))...)))...........	61	1606
ENSG00000172915	NBEA	hsa-miR-29a-3p	UAGCACCAUCUGAAAUCGGUUA	UAAUUAUUUCAUAUAUUGUUG	(((((..((.((((((.(((((&))))))))))).))..)))))	61	1479
ENSG00000172915	NBEA	hsa-miR-29a-3p	UAGCACCAUCUGAAAUCGGUUA	UAAUUAUUUCAUAUAUUGUUG	(((((..((.((((((.(((((&))))))))))).))..)))))	61	1480
ENSG00000172915	NBEA	hsa-miR-29a-3p	UAGCACCAUCUGAAAUCGGUUA	UAAUUAUUUCAUAUAUUGUUG	(((((..((.((((((.(((((&))))))))))).))..)))))	61	1479
ENSG00000172915	NBEA	hsa-miR-29a-3p	UAGCACCAUCUGAAAUCGGUUA	UAAUUAUUUCAUAUAUUGUUG	(((((..((.((((((.(((((&))))))))))).))..)))))	61	1479
ENSG00000172915	NBEA	hsa-miR-29a-3p	UAGCACCAUCUGAAAUCGGUUA	UAAUUAUUUCAUAUAUUGUUG	(((((..((.((((((.(((((&))))))))))).))..)))))	61	1479
ENSG00000206579	XKR4	hsa-miR-29a-3p	UAGCACCAUCUGAAAUCGGUUA	AAAUGGGUUUCAGAAAGUUUA	........(((((((((.(((.&.))).))))))))).......	61	2673
ENSG00000206579	XKR4	hsa-miR-29a-3p	UAGCACCAUCUGAAAUCGGUUA	UAACUGUAUUUCUCCAGCAUACUGGUUA	...........(((((((((((&)))))).))))).((((....))))...	60	10237
ENSG00000049246	PER3	hsa-miR-29b-3p	UAGCACCAUUUGAAAUCAGUGUU	AAUAAUGAUUGUAAAAUGUUUUA	......(((((..(((((.(((.&.))).)))))...))))).....	67	1619
ENSG00000049246	PER3	hsa-miR-29b-3p	UAGCACCAUUUGAAAUCAGUGUU	AAUAAUGAUUGUAAAAUGUUUUA	......(((((..(((((.(((.&.))).)))))...))))).....	67	1619
ENSG00000049246	PER3	hsa-miR-29b-3p	UAGCACCAUUUGAAAUCAGUGUU	AAUAAUGAUUGUAAAAUGUUUUA	......(((((..(((((.(((.&.))).)))))...))))).....	67	1618
ENSG00000049246	PER3	hsa-miR-29b-3p	UAGCACCAUUUGAAAUCAGUGUU	AAUAAUGAUUGUAAAAUGUUUUA	......(((((..(((((.(((.&.))).)))))...))))).....	67	1618
ENSG00000053254	FOXN3	hsa-miR-29b-3p	UAGCACCAUUUGAAAUCAGUGUU	AAUACUAUAUCAAACACUGUUA	(((((...(((((.((.(((((.&.))))))).)))))...)))))	68	1629
ENSG00000053254	FOXN3	hsa-miR-29b-3p	UAGCACCAUUUGAAAUCAGUGUU	AACACAGUUUUUAAAACGAUCCA	........(((((((.(.((((.&.)))).).)))))))........	65	1087
ENSG00000101745	ANKRD12	hsa-miR-29b-3p	UAGCACCAUUUGAAAUCAGUGUU	AGCACUGGUUCUGUUGAAGUUA	((((..((...(((.(((((((.&.))))))))))...))..))))	66	752
ENSG00000101745	ANKRD12	hsa-miR-29b-3p	UAGCACCAUUUGAAAUCAGUGUU	AACACAGUUUCUAAUAGAAAACUA	.....(.(((.(((((..((((.&.)))).))))).))).).......	64	2425
ENSG00000104332	SFRP1	hsa-miR-29b-3p	UAGCACCAUUUGAAAUCAGUGUU	AACUUGAUUGCCUAUGGAUCAA	.....((((....((((((.((.&.))))))))....)))).....	62	1943
ENSG00000104332	SFRP1	hsa-miR-29b-3p	UAGCACCAUUUGAAAUCAGUGUU	AACUUGAUUGCCUAUGGAUCAA	.....((((....((((((.((.&.))))))))....)))).....	62	1949
ENSG00000112245	PTP4A1	hsa-miR-29b-3p	UAGCACCAUUUGAAAUCAGUGUU	UAUACUUUUUAAAGGUCUA	(((.(((.(((((((..(((((.&.))))))))))))))))))	61	1921
ENSG00000112773	FAM46A	hsa-miR-29b-3p	UAGCACCAUUUGAAAUCAGUGUU	CACACUGCAUUUAAAUAUUUAGUACUG	.......(((((((..((((((.&.))))))..)))))))...........	63	2234
ENSG00000112773	FAM46A	hsa-miR-29b-3p	UAGCACCAUUUGAAAUCAGUGUU	CACACUGCAUUUAAAUAUUUAGUACUG	.......(((((((..((((((.&.))))))..)))))))...........	63	2234
ENSG00000112773	FAM46A	hsa-miR-29b-3p	UAGCACCAUUUGAAAUCAGUGUU	CACACUGCAUUUAAAUAUUUAGUACUG	.......(((((((..((((((.&.))))))..)))))))...........	63	2234
ENSG00000115525	ST3GAL5	hsa-miR-29b-3p	UAGCACCAUUUGAAAUCAGUGUU	AACACUGAAAUGAAAUCUUCCCA	.......((((.(..(((((((.&.)))))))..).)))).......	67	120
ENSG00000115525	ST3GAL5	hsa-miR-29b-3p	UAGCACCAUUUGAAAUCAGUGUU	AACACUGAAAUGAAAUCUUCCCA	.......((((.(..(((((((.&.)))))))..).)))).......	67	120
ENSG00000115525	ST3GAL5	hsa-miR-29b-3p	UAGCACCAUUUGAAAUCAGUGUU	AACACUGAAAUGAAAUCUUCCCA	.......((((.(..(((((((.&.)))))))..).)))).......	67	120
ENSG00000118432	CNR1	hsa-miR-29b-3p	UAGCACCAUUUGAAAUCAGUGUU	AACAUUUUUCAAUAGCGUGUGUA	..(((((..((((((..(((((.&.)))))))))))..).))))...	65	2485
ENSG00000118432	CNR1	hsa-miR-29b-3p	UAGCACCAUUUGAAAUCAGUGUU	AAAUUUAUUUCCAAUGUUUCAA	......((((.(((((.(((...&..))).))))).))))......	64	374
ENSG00000118432	CNR1	hsa-miR-29b-3p	UAGCACCAUUUGAAAUCAGUGUU	UGCACUGGCCUUCUGAUGAAAUGUUA	(((((.((((.(((.(((((((.&.)))))))..))).))))...)))))	61	638
ENSG00000118432	CNR1	hsa-miR-29b-3p	UAGCACCAUUUGAAAUCAGUGUU	AACAUUUUUCAAUAGCGUGUGUA	..(((((..((((((..(((((.&.)))))))))))..).))))...	65	2473
ENSG00000118432	CNR1	hsa-miR-29b-3p	UAGCACCAUUUGAAAUCAGUGUU	AAAUUUAUUUCCAAUGUUUCAA	......((((.(((((.(((...&..))).))))).))))......	64	362
ENSG00000118432	CNR1	hsa-miR-29b-3p	UAGCACCAUUUGAAAUCAGUGUU	UGCACUGGCCUUCUGAUGAAAUGUUA	(((((.((((.(((.(((((((.&.)))))))..))).))))...)))))	61	626
ENSG00000118922	KLF12	hsa-miR-29b-3p	UAGCACCAUUUGAAAUCAGUGUU	UACAGUGUUUACAAAUGCCAGUUCCA	......((((((.((.((.(((.&.))).)).)).)))))).........	67	5835
ENSG00000134758	RNF138	hsa-miR-29b-3p	UAGCACCAUUUGAAAUCAGUGUU	AACUUGAUUUAAUAAAAAUGUUA	(((((.......(((((((.((.&.)))))))))........)))))	60	853
ENSG00000138735	PDE5A	hsa-miR-29b-3p	UAGCACCAUUUGAAAUCAGUGUU	AGCAUUGACUUGAAGUGAGACAUGGUUA	......(((((.((.(((((((.&.))))))).)).)))))...........	65	3296
ENSG00000138735	PDE5A	hsa-miR-29b-3p	UAGCACCAUUUGAAAUCAGUGUU	AGCAUUGACUUGAAGUGAGACAUGGUUA	......(((((.((.(((((((.&.))))))).)).)))))...........	65	3298
ENSG00000145012	LPP	hsa-miR-29b-3p	UAGCACCAUUUGAAAUCAGUGUU	CACACUGACUUCCACAAUGGUUGAACUA	....((((((.(((.(((((((.&.))))))).)))...)))))).......	81	4933
ENSG00000145012	LPP	hsa-miR-29b-3p	UAGCACCAUUUGAAAUCAGUGUU	AACUCUGCUUCCAAACUAGUUUA	........((((.((.(((.((.&.)).))).)).))))........	68	3459
ENSG00000145012	LPP	hsa-miR-29b-3p	UAGCACCAUUUGAAAUCAGUGUU	AAUGGUGUUUACAAGUGGAUAGAUA	.(((((((((.............&)))))))))................	65	553
ENSG00000145012	LPP	hsa-miR-29b-3p	UAGCACCAUUUGAAAUCAGUGUU	CACACUGACUUCCACAAUGGUUGAACUA	....((((((.(((.(((((((.&.))))))).)))...)))))).......	81	4933
ENSG00000145012	LPP	hsa-miR-29b-3p	UAGCACCAUUUGAAAUCAGUGUU	AACUCUGCUUCCAAACUAGUUUA	........((((.((.(((.((.&.)).))).)).))))........	68	3459
ENSG00000145012	LPP	hsa-miR-29b-3p	UAGCACCAUUUGAAAUCAGUGUU	AAUGGUGUUUACAAGUGGAUAGAUA	.(((((((((.............&)))))))))................	65	553
ENSG00000145012	LPP	hsa-miR-29b-3p	UAGCACCAUUUGAAAUCAGUGUU	CACACUGACUUCCACAAUGGUUGAACUA	....((((((.(((.(((((((.&.))))))).)))...)))))).......	81	4933
ENSG00000145012	LPP	hsa-miR-29b-3p	UAGCACCAUUUGAAAUCAGUGUU	AACUCUGCUUCCAAACUAGUUUA	........((((.((.(((.((.&.)).))).)).))))........	68	3459
ENSG00000145012	LPP	hsa-miR-29b-3p	UAGCACCAUUUGAAAUCAGUGUU	AAUGGUGUUUACAAGUGGAUAGAUA	.(((((((((.............&)))))))))................	65	553
ENSG00000145349	CAMK2D	hsa-miR-29b-3p	UAGCACCAUUUGAAAUCAGUGUU	CACAUUGUUUUGGUGAAUUUGCUG	...(((((....(((.((((((.&.)))))))))))))).........	60	2789
ENSG00000145349	CAMK2D	hsa-miR-29b-3p	UAGCACCAUUUGAAAUCAGUGUU	CACAUUGUUUUGGUGAAUUUGCUG	...(((((....(((.((((((.&.)))))))))))))).........	60	860
ENSG00000145349	CAMK2D	hsa-miR-29b-3p	UAGCACCAUUUGAAAUCAGUGUU	CACAUUGUUUUGGUGAAUUUGCUG	...(((((....(((.((((((.&.)))))))))))))).........	60	2789
ENSG00000147459	DOCK5	hsa-miR-29b-3p	UAGCACCAUUUGAAAUCAGUGUU	GACCUGAUUGGAAAGAAUGUCUA	..(((...(((..((((((.(((&)))))))))..)))...)))...	60	3661
ENSG00000147459	DOCK5	hsa-miR-29b-3p	UAGCACCAUUUGAAAUCAGUGUU	AACAAUAUUUGAAAUGUCCCA	......(((((.((((...(((.&.)))..)))).))))).....	63	3116
ENSG00000147526	TACC1	hsa-miR-29b-3p	UAGCACCAUUUGAAAUCAGUGUU	AACAUUGAUUGCUAAAUCUUUUUGCUG	(((((..(((((.(((((((((.&.)))))))))..))))).....)))))	73	3047
ENSG00000147526	TACC1	hsa-miR-29b-3p	UAGCACCAUUUGAAAUCAGUGUU	GACUACUGCUAUCAGGAUUGUGUUG	((((((.((((((...(((((((&))).))))...))).))).))))))	71	160
ENSG00000147526	TACC1	hsa-miR-29b-3p	UAGCACCAUUUGAAAUCAGUGUU	AACAUUGAUUGCUAAAUCUUUUUGCUG	(((((..(((((.(((((((((.&.)))))))))..))))).....)))))	73	794
ENSG00000147526	TACC1	hsa-miR-29b-3p	UAGCACCAUUUGAAAUCAGUGUU	AACAUUGAUUGCUAAAUCUUUUUGCUG	(((((..(((((.(((((((((.&.)))))))))..))))).....)))))	73	812
ENSG00000147526	TACC1	hsa-miR-29b-3p	UAGCACCAUUUGAAAUCAGUGUU	AACAUUGAUUGCUAAAUCUUUUUGCUG	(((((..(((((.(((((((((.&.)))))))))..))))).....)))))	73	812
ENSG00000147526	TACC1	hsa-miR-29b-3p	UAGCACCAUUUGAAAUCAGUGUU	AACAUUGAUUGCUAAAUCUUUUUGCUG	(((((..(((((.(((((((((.&.)))))))))..))))).....)))))	73	3047
ENSG00000147526	TACC1	hsa-miR-29b-3p	UAGCACCAUUUGAAAUCAGUGUU	GACUACUGCUAUCAGGAUUGUGUUG	((((((.((((((...(((((((&))).))))...))).))).))))))	71	160
ENSG00000149577	SIDT2	hsa-miR-29b-3p	UAGCACCAUUUGAAAUCAGUGUU	GAUACAGAGUUCAGCCCGUUCUG	(((.((...(((((.((.(((((&))))).)).)))))...)).)))	61	466
ENSG00000149577	SIDT2	hsa-miR-29b-3p	UAGCACCAUUUGAAAUCAGUGUU	GAUACAGAGUUCAGCCCGUUCUG	(((.((...(((((.((.(((((&))))).)).)))))...)).)))	61	469
ENSG00000149577	SIDT2	hsa-miR-29b-3p	UAGCACCAUUUGAAAUCAGUGUU	GAUACAGAGUUCAGCCCGUUCUG	(((.((...(((((.((.(((((&))))).)).)))))...)).)))	61	465
ENSG00000149577	SIDT2	hsa-miR-29b-3p	UAGCACCAUUUGAAAUCAGUGUU	GAUACAGAGUUCAGCCCGUUCUG	(((.((...(((((.((.(((((&))))).)).)))))...)).)))	61	303
ENSG00000165338	HECTD2	hsa-miR-29b-3p	UAGCACCAUUUGAAAUCAGUGUU	AACCAGAUUUAAGUGUUUUA	......((((((((.((.(.((.&.))).)))))))))).....	60	664
ENSG00000165338	HECTD2	hsa-miR-29b-3p	UAGCACCAUUUGAAAUCAGUGUU	AACCAGAUUUAAGUGUUUUA	......((((((((.((.(.((.&.))).)))))))))).....	60	661
ENSG00000165338	HECTD2	hsa-miR-29b-3p	UAGCACCAUUUGAAAUCAGUGUU	AACCAGAUUUAAGUGUUUUA	......((((((((.((.(.((.&.))).)))))))))).....	60	596
ENSG00000170345	FOS	hsa-miR-29b-3p	UAGCACCAUUUGAAAUCAGUGUU	AGCAUUGUUUGCUUAUUGUUCCA	.((((...........((((((.&.))))))..))))..........	61	36
ENSG00000182836	PLCXD3	hsa-miR-29b-3p	UAGCACCAUUUGAAAUCAGUGUU	AACAGUGAGAUCAAAGGCUGGUUUCUA	.(.((((.(((((..(((.(((.&.))).)))..))))))).)).).....	75	492
ENSG00000182836	PLCXD3	hsa-miR-29b-3p	UAGCACCAUUUGAAAUCAGUGUU	AACAUUGGUCAGCUCUAGGUCCUG	(((.(((.......((((((((.&.))))))))........))).)))	63	1114
ENSG00000182836	PLCXD3	hsa-miR-29b-3p	UAGCACCAUUUGAAAUCAGUGUU	AAUAGUGUUUCACAGUAUUUCUA	..........(((((.((.(((.&.))).)))))))...........	60	6025
ENSG00000182836	PLCXD3	hsa-miR-29b-3p	UAGCACCAUUUGAAAUCAGUGUU	AACAGUGAGAUCAAAGGCUGGUUUCUA	.(.((((.(((((..(((.(((.&.))).)))..))))))).)).).....	75	489
ENSG00000182836	PLCXD3	hsa-miR-29b-3p	UAGCACCAUUUGAAAUCAGUGUU	AACAUUGGUCAGCUCUAGGUCCUG	(((.(((.......((((((((.&.))))))))........))).)))	63	1111
ENSG00000182836	PLCXD3	hsa-miR-29b-3p	UAGCACCAUUUGAAAUCAGUGUU	AAUAGUGUUUCACAGUAUUUCUA	..........(((((.((.(((.&.))).)))))))...........	60	5832
ENSG00000198961	PJA2	hsa-miR-29b-3p	UAGCACCAUUUGAAAUCAGUGUU	AAUGCUGAUAUUUAAAGGUAGAUCUA	....(((.((((((((((((((.&.)))))))).))))))))).......	76	219
ENSG00000198961	PJA2	hsa-miR-29b-3p	UAGCACCAUUUGAAAUCAGUGUU	AAUGCUGAUAUUUAAAGGUAGAUCUA	....(((.((((((((((((((.&.)))))))).))))))))).......	76	223
ENSG00000206579	XKR4	hsa-miR-29b-3p	UAGCACCAUUUGAAAUCAGUGUU	AGCCUGAGUUACAAAUGACAUGACUA	(((((.((((((((.((((.((.&.)))))).)).))))))...)).)))	70	1174
ENSG00000206579	XKR4	hsa-miR-29b-3p	UAGCACCAUUUGAAAUCAGUGUU	UACACUGCCAUCAGACUGUUGUGGUA	..(((.(((((((...((((((.&.))))))...))))).)).)))....	67	14938
ENSG00000206579	XKR4	hsa-miR-29b-3p	UAGCACCAUUUGAAAUCAGUGUU	AACACAUGAAUGAAAGAGGUCAGGUA	....(((.(((..(.(((((((.&.)))).))).)..))).)))......	65	5289
ENSG00000206579	XKR4	hsa-miR-29b-3p	UAGCACCAUUUGAAAUCAGUGUU	AACAUUGUAUUCCAUGAACAAGUGAUA	...((((((..(((..((((((.&.))))))..))).))).....)))...	63	1762
ENSG00000206579	XKR4	hsa-miR-29b-3p	UAGCACCAUUUGAAAUCAGUGUU	AAAACAGAUUUAAUCAAAUUAUUA	.......((((((((((..((((&..))))))))...)))))).....	61	9117
ENSG00000053254	FOXN3	hsa-miR-424-5p	CAGCAGCAAUUCAUGUUUUGAA	UUCUAAGUGUGAUUUUCCUG	...(((....((((((((.(((&))).)))))))).....)))	64	3230
ENSG00000079335	CDC14A	hsa-miR-424-5p	CAGCAGCAAUUCAUGUUUUGAA	AUCAGAAUUCACUGAAUAUUUCUUCUG	(((.((..(((((.(((((((.&.)))))))....)))))....)).)))	60	1212
ENSG00000079335	CDC14A	hsa-miR-424-5p	CAGCAGCAAUUCAUGUUUUGAA	AUCAAAACAUCUUGUUCAUG	....(((((...(((((((((.&.))))))))).)))))....	62	641
ENSG00000104332	SFRP1	hsa-miR-424-5p	CAGCAGCAAUUCAUGUUUUGAA	UUCAGAGCAAGUUCCUGAGUG	...(((.((((..(((((((((&))))))))))))).)))....	64	1237
ENSG00000104332	SFRP1	hsa-miR-424-5p	CAGCAGCAAUUCAUGUUUUGAA	UUCAGAGCAAGUUCCUGAGUG	...(((.((((..(((((((((&))))))))))))).)))....	64	1243
ENSG00000118432	CNR1	hsa-miR-424-5p	CAGCAGCAAUUCAUGUUUUGAA	UUCUAAAAUUGAGUUCUUCCUG	(((.((.((((((..(((.(((&))).)))..))))))))..)))	70	2773
ENSG00000118432	CNR1	hsa-miR-424-5p	CAGCAGCAAUUCAUGUUUUGAA	UUCAUGGACAUAGAGUGUUUCAUG	....((((.(((((((((((((&)))).)))))).))))))).....	64	1092
ENSG00000118432	CNR1	hsa-miR-424-5p	CAGCAGCAAUUCAUGUUUUGAA	UUCUAAAAUUGAGUUCUUCCUG	(((.((.((((((..(((.(((&))).)))..))))))))..)))	70	2761
ENSG00000118922	KLF12	hsa-miR-424-5p	CAGCAGCAAUUCAUGUUUUGAA	UUCAGAAUAGAAAAAGGUCUGUUG	(((((((..(((.(((((((((&))))))))))))....).))))))	66	7158
ENSG00000118922	KLF12	hsa-miR-424-5p	CAGCAGCAAUUCAUGUUUUGAA	UUCACAGAGAUUCAUUUUUGUUG	((((((.(((..((.(((((((&)))).))).))..))).))))))	64	1627
ENSG00000118922	KLF12	hsa-miR-424-5p	CAGCAGCAAUUCAUGUUUUGAA	UUCAAAAUGUAUUAAUACGCCUUUG	..((........((((((((((&))))))))))........)).....	60	5562
ENSG00000122707	RECK	hsa-miR-424-5p	CAGCAGCAAUUCAUGUUUUGAA	UUCAGAACCCCAACUACUGUG	..((((........((((((((&))))))))........)))).	63	817
ENSG00000138639	ARHGAP24	hsa-miR-424-5p	CAGCAGCAAUUCAUGUUUUGAA	UUCAAGAGGGAAAGUGGUCUGUACUG	(((.(.((.(((.(.(((((((&))))))).))))..)).)))).....	62	4239
ENSG00000138639	ARHGAP24	hsa-miR-424-5p	CAGCAGCAAUUCAUGUUUUGAA	UUCAAGAGGGAAAGUGGUCUGUACUG	(((.(.((.(((.(.(((((((&))))))).))))..)).)))).....	62	484
ENSG00000138735	PDE5A	hsa-miR-424-5p	CAGCAGCAAUUCAUGUUUUGAA	GUCAAAAAUGAAUUUGAGG	.......(((((((.((((((.&.))))))))))))).....	61	3179
ENSG00000138735	PDE5A	hsa-miR-424-5p	CAGCAGCAAUUCAUGUUUUGAA	GUCAAAAAUGAAUUUGAGG	.......(((((((.((((((.&.))))))))))))).....	61	3181
ENSG00000145335	SNCA	hsa-miR-424-5p	CAGCAGCAAUUCAUGUUUUGAA	UUCAAGACAGAAUAUUCUAGACAUG	........((((.(((((((((&)))))))))))))............	67	918
ENSG00000145335	SNCA	hsa-miR-424-5p	CAGCAGCAAUUCAUGUUUUGAA	UUCAAGACAGAAUAUUCUAGACAUG	........((((.(((((((((&)))))))))))))............	67	891
ENSG00000145335	SNCA	hsa-miR-424-5p	CAGCAGCAAUUCAUGUUUUGAA	UUCAAGACAGAAUAUUCUAGACAUG	........((((.(((((((((&)))))))))))))............	67	897
ENSG00000145335	SNCA	hsa-miR-424-5p	CAGCAGCAAUUCAUGUUUUGAA	UUCAAGACAGAAUAUUCUAGACAUG	........((((.(((((((((&)))))))))))))............	67	897
ENSG00000145349	CAMK2D	hsa-miR-424-5p	CAGCAGCAAUUCAUGUUUUGAA	UUCAGAAGAGGUACUGUAUGUAUG	((((((...(((...(((((((&))))))))))...)))).))....	60	1339
ENSG00000145349	CAMK2D	hsa-miR-424-5p	CAGCAGCAAUUCAUGUUUUGAA	UUCAGAAGAGGUACUGUAUGUAUG	((((((...(((...(((((((&))))))))))...)))).))....	60	1339
ENSG00000147459	DOCK5	hsa-miR-424-5p	CAGCAGCAAUUCAUGUUUUGAA	AUCCAGACAAUGAAUUUGCUACGAUG	....((((((((((((((.((.&.)).)))).))))).)))))......	70	2125
ENSG00000147459	DOCK5	hsa-miR-424-5p	CAGCAGCAAUUCAUGUUUUGAA	UUCCAGACCGGGAUCUGAUG	...(((..((((..((((.(((&))).))))..)))))))...	62	1479
ENSG00000147459	DOCK5	hsa-miR-424-5p	CAGCAGCAAUUCAUGUUUUGAA	CUCAAAACAGGGUUUUUCUCCGUG	.......(((((.((((((((.&.)))))))))))))..........	62	3608
ENSG00000147459	DOCK5	hsa-miR-424-5p	CAGCAGCAAUUCAUGUUUUGAA	CUUAAGAAAUGAGUAUGCAGAUUCUG	.....(((((((((.((((((.&.)))))).)))))).)))........	66	2791
ENSG00000147526	TACC1	hsa-miR-424-5p	CAGCAGCAAUUCAUGUUUUGAA	CUCAAAACAGUAAUUUCCUG	...(((.((((..((((((((.&.))))))))..))))..)))	68	538
ENSG00000147526	TACC1	hsa-miR-424-5p	CAGCAGCAAUUCAUGUUUUGAA	CUCAAAACAGUAAUUUCCUG	...(((.((((..((((((((.&.))))))))..))))..)))	68	538
ENSG00000151090	THRB	hsa-miR-424-5p	CAGCAGCAAUUCAUGUUUUGAA	UUCAGGCAUGGCUGGAUCUG	...((((....(((((((.(((&))))))))))))))......	60	544
ENSG00000166869	CHP2	hsa-miR-424-5p	CAGCAGCAAUUCAUGUUUUGAA	GGCAAAACAAGAGAUGCCCAUUACUG	.....(((.(((.(((((((..&..))))))).))).))).........	60	142
ENSG00000007168	PAFAH1B1	hsa-miR-7-5p	UGGAAGACUAGUGAUUUUGUUGU	ACAGGAGUCCAGUCACUCGAGUCAUUUUCCA	((((((((((((((((((.((((&)))).))...)))))))..))))...)))))	69	33
ENSG00000049246	PER3	hsa-miR-7-5p	UGGAAGACUAGUGAUUUUGUUGU	CUAAUAGAAGCCUUUCUUUUCCA	(((((((..((.(.((((((((.&.)))))))).)))...)))))))	61	593
ENSG00000049246	PER3	hsa-miR-7-5p	UGGAAGACUAGUGAUUUUGUUGU	CUAAUAGAAGCCUUUCUUUUCCA	(((((((..((.(.((((((((.&.)))))))).)))...)))))))	61	593
ENSG00000049246	PER3	hsa-miR-7-5p	UGGAAGACUAGUGAUUUUGUUGU	CUAAUAGAAGCCUUUCUUUUCCA	(((((((..((.(.((((((((.&.)))))))).)))...)))))))	61	592
ENSG00000049246	PER3	hsa-miR-7-5p	UGGAAGACUAGUGAUUUUGUUGU	CUAAUAGAAGCCUUUCUUUUCCA	(((((((..((.(.((((((((.&.)))))))).)))...)))))))	61	592
ENSG00000053254	FOXN3	hsa-miR-7-5p	UGGAAGACUAGUGAUUUUGUUGU	GCAAUAAAAAUUACUGAGUUGCAUCAA	(((..((((((((((((((((((&))))).))))))))).))))...))).	71	16
ENSG00000053254	FOXN3	hsa-miR-7-5p	UGGAAGACUAGUGAUUUUGUUGU	ACAACAGUGUUUUUCCACUGUAUUUCA	(((((.((.((((((.(((((((&))))))).)).....)))))).)))))	64	892
ENSG00000053254	FOXN3	hsa-miR-7-5p	UGGAAGACUAGUGAUUUUGUUGU	CCAGGAAAGCCACUGGAAUUGUCA	.......((((((.((((.(((.&.))).)))).))))))........	61	5660
ENSG00000053254	FOXN3	hsa-miR-7-5p	UGGAAGACUAGUGAUUUUGUUGU	CCAGGAAAGCCACUGGAAUUGUCA	.......((((((.((((.(((.&.))).)))).))))))........	61	432
ENSG00000053254	FOXN3	hsa-miR-7-5p	UGGAAGACUAGUGAUUUUGUUGU	CCAGGAAAGCCACUGGAAUUGUCA	.......((((((.((((.(((.&.))).)))).))))))........	61	447
ENSG00000053254	FOXN3	hsa-miR-7-5p	UGGAAGACUAGUGAUUUUGUUGU	ACAAGAAGUCAAGACUCCUA	.(((.(.((..(((((((.((((&))))))))))))).))))..	64	204
ENSG00000053254	FOXN3	hsa-miR-7-5p	UGGAAGACUAGUGAUUUUGUUGU	CCAGGAAAGCCACUGGAAUUGUCA	.......((((((.((((.(((.&.))).)))).))))))........	61	471
ENSG00000065559	MAP2K4	hsa-miR-7-5p	UGGAAGACUAGUGAUUUUGUUGU	GCAAUAAGAUUGGUGUUCGUUUCCA	(((((((.((.((((((((((((&)))))))))))).)).))..)))))	67	2439
ENSG00000065559	MAP2K4	hsa-miR-7-5p	UGGAAGACUAGUGAUUUUGUUGU	ACAAAAGGGUGUAUAGUGUUCACA	..(((.((((...(((((.((((&)))).)))))...)))).)))...	63	394
ENSG00000065559	MAP2K4	hsa-miR-7-5p	UGGAAGACUAGUGAUUUUGUUGU	GCAAUAAGAUUGGUGUUCGUUUCCA	(((((((.((.((((((((((((&)))))))))))).)).))..)))))	67	230
ENSG00000065559	MAP2K4	hsa-miR-7-5p	UGGAAGACUAGUGAUUUUGUUGU	GCAAUAAGAUUGGUGUUCGUUUCCA	(((((((.((.((((((((((((&)))))))))))).)).))..)))))	67	2432
ENSG00000065559	MAP2K4	hsa-miR-7-5p	UGGAAGACUAGUGAUUUUGUUGU	ACAAAAGGGUGUAUAGUGUUCACA	..(((.((((...(((((.((((&)))).)))))...)))).)))...	63	387
ENSG00000101745	ANKRD12	hsa-miR-7-5p	UGGAAGACUAGUGAUUUUGUUGU	AUAAGAUAACCACUAGUAUUCAA	..(((.((((((((((((((...&)))))))...))))))).)))..	79	2290
ENSG00000101745	ANKRD12	hsa-miR-7-5p	UGGAAGACUAGUGAUUUUGUUGU	ACAAAGAAACUUAGCUCUUUUUUCA	.(((((((((((..((((((...&))))))..)).))).))))))....	65	1715
ENSG00000101745	ANKRD12	hsa-miR-7-5p	UGGAAGACUAGUGAUUUUGUUGU	GCACAAAAUUUCUUCAGUUUAUUA	..(((((.....((((((((.((&))))))))))))))).........	64	2176
ENSG00000104332	SFRP1	hsa-miR-7-5p	UGGAAGACUAGUGAUUUUGUUGU	AUGACAAACACCCACUUAUUUUUCA	(((((((..((((..((((((((&))))))))....))))..)))))))	67	2215
ENSG00000104332	SFRP1	hsa-miR-7-5p	UGGAAGACUAGUGAUUUUGUUGU	GCAGCAAAAACUACAUUUUGCA	((.((((.((((..(((((((((&)))))))))))))..)))).))	67	2833
ENSG00000104332	SFRP1	hsa-miR-7-5p	UGGAAGACUAGUGAUUUUGUUGU	AUGACAAACACCCACUUAUUUUUCA	(((((((..((((..((((((((&))))))))....))))..)))))))	67	2221
ENSG00000104332	SFRP1	hsa-miR-7-5p	UGGAAGACUAGUGAUUUUGUUGU	GCAGCAAAAACUACAUUUUGCA	((.((((.((((..(((((((((&)))))))))))))..)))).))	67	2839
ENSG00000112245	PTP4A1	hsa-miR-7-5p	UGGAAGACUAGUGAUUUUGUUGU	GCAGGAAACUAUCUGAUAGUGUUCUA	(((((.((((..((((((.((((&)))).)))..)))...)))).)))))	65	985
ENSG00000112245	PTP4A1	hsa-miR-7-5p	UGGAAGACUAGUGAUUUUGUUGU	AGACAAAAUUUGUUAGGGUCAUUCA	..(((((((...(((((((((..&.)))))))))......)))).))).	64	1973
ENSG00000112245	PTP4A1	hsa-miR-7-5p	UGGAAGACUAGUGAUUUUGUUGU	GCAUAUAAAAUGUGCUUGUCAUUUG	.....(((.(((.((((((((((&))).)))))))..))).))).....	63	3172
ENSG00000112245	PTP4A1	hsa-miR-7-5p	UGGAAGACUAGUGAUUUUGUUGU	GCAAAAAAAGAAAUGGGUUUCUG	.((((..(((....((((.((((&)))).))))....)))..)))).	61	2395
ENSG00000112773	FAM46A	hsa-miR-7-5p	UGGAAGACUAGUGAUUUUGUUGU	AUAAAAAAGUUAUUUUUUUCUA	(((((((..(((((((((.((((&)))).))))))))).)))))))	64	4
ENSG00000112773	FAM46A	hsa-miR-7-5p	UGGAAGACUAGUGAUUUUGUUGU	ACAAAUGAGUCGUCUACUAUUUUA	(((.((((....(((((..((((&))))..))))))))).))).....	61	1417
ENSG00000112773	FAM46A	hsa-miR-7-5p	UGGAAGACUAGUGAUUUUGUUGU	ACAGUAGAUUGACUAUGAUCUA	....((((((((.(.((((((((&)))))))).).)))).).))).	60	2861
ENSG00000112773	FAM46A	hsa-miR-7-5p	UGGAAGACUAGUGAUUUUGUUGU	AUAAAAAAGUUAUUUUUUUCUA	(((((((..(((((((((.((((&)))).))))))))).)))))))	64	4
ENSG00000112773	FAM46A	hsa-miR-7-5p	UGGAAGACUAGUGAUUUUGUUGU	ACAAAUGAGUCGUCUACUAUUUUA	(((.((((....(((((..((((&))))..))))))))).))).....	61	1417
ENSG00000112773	FAM46A	hsa-miR-7-5p	UGGAAGACUAGUGAUUUUGUUGU	ACAGUAGAUUGACUAUGAUCUA	....((((((((.(.((((((((&)))))))).).)))).).))).	60	2861
ENSG00000112773	FAM46A	hsa-miR-7-5p	UGGAAGACUAGUGAUUUUGUUGU	AUAAAAAAGUUAUUUUUUUCUA	(((((((..(((((((((.((((&)))).))))))))).)))))))	64	4
ENSG00000112773	FAM46A	hsa-miR-7-5p	UGGAAGACUAGUGAUUUUGUUGU	ACAAAUGAGUCGUCUACUAUUUUA	(((.((((....(((((..((((&))))..))))))))).))).....	61	1417
ENSG00000112773	FAM46A	hsa-miR-7-5p	UGGAAGACUAGUGAUUUUGUUGU	ACAGUAGAUUGACUAUGAUCUA	....((((((((.(.((((((((&)))))))).).)))).).))).	60	2861
ENSG00000118432	CNR1	hsa-miR-7-5p	UGGAAGACUAGUGAUUUUGUUGU	AUAGCAAAGUAGUACUUCUUCUG	.((((((..((((((((((((((&))))))))))..)))))))))).	69	151
ENSG00000118432	CNR1	hsa-miR-7-5p	UGGAAGACUAGUGAUUUUGUUGU	AAAUAAAAAUUCUAGAUUACCA	(((....((((...(((((((..&.)))))))...))))....)))	66	14
ENSG00000118432	CNR1	hsa-miR-7-5p	UGGAAGACUAGUGAUUUUGUUGU	AUAGGAAGACACAUUAUCUUCUG	.((((((.(((((.((((.((((&)))).))))..))))))))))).	60	3219
ENSG00000118432	CNR1	hsa-miR-7-5p	UGGAAGACUAGUGAUUUUGUUGU	GCAUCAAGAGCACGGUCAAGAUUGCCA	.....((((.(((.(((((.(((&))).))))).)))))))..........	68	47
ENSG00000118432	CNR1	hsa-miR-7-5p	UGGAAGACUAGUGAUUUUGUUGU	AUAGCAAAGUAGUACUUCUUCUG	.((((((..((((((((((((((&))))))))))..)))))))))).	69	139
ENSG00000118432	CNR1	hsa-miR-7-5p	UGGAAGACUAGUGAUUUUGUUGU	AAAUAAAAAUUCUAGAUUACCA	(((....((((...(((((((..&.)))))))...))))....)))	66	2
ENSG00000118432	CNR1	hsa-miR-7-5p	UGGAAGACUAGUGAUUUUGUUGU	AUAGGAAGACACAUUAUCUUCUG	.((((((.(((((.((((.((((&)))).))))..))))))))))).	60	3207
ENSG00000118922	KLF12	hsa-miR-7-5p	UGGAAGACUAGUGAUUUUGUUGU	ACAUAAAAAUUGCUAUAUUUUCA	..(((((.((((((((((..(((&)))..))))))))))..))))).	73	4906
ENSG00000118922	KLF12	hsa-miR-7-5p	UGGAAGACUAGUGAUUUUGUUGU	CCAGCAAAUUCAUGUUUGUCCA	((((((((..((((.(((((((.&.))))))).)))))))).))))	71	1040
ENSG00000118922	KLF12	hsa-miR-7-5p	UGGAAGACUAGUGAUUUUGUUGU	ACAAUAACUUCACUGAGGACUCACG	.(..((.(((((((..(((((((&)))))))..))))).))..))..).	63	8347
ENSG00000118922	KLF12	hsa-miR-7-5p	UGGAAGACUAGUGAUUUUGUUGU	GCAAUAGAAAUCCAGAUUUUCA	..(((((((.(.(((((((((((&))))))).))))))).))))).	67	4812
ENSG00000118922	KLF12	hsa-miR-7-5p	UGGAAGACUAGUGAUUUUGUUGU	GCAACAGAAAAGCAGUAGAAUCCUA	.(((..(((.((..(((((((((&)))))))))..)))))....)))..	61	6437
ENSG00000118922	KLF12	hsa-miR-7-5p	UGGAAGACUAGUGAUUUUGUUGU	GCAACAUAAACCACAUUUUUUAA	(((((((...(((.(((((((((&)))))).))).))).))))))).	66	5942
ENSG00000118922	KLF12	hsa-miR-7-5p	UGGAAGACUAGUGAUUUUGUUGU	ACCACAAGCUGGGUUUUUUUCCA	((((((((((((....((((.((&)).)))))))))....)))))))	63	7758
ENSG00000132561	MATN2	hsa-miR-7-5p	UGGAAGACUAGUGAUUUUGUUGU	ACAGCAGGAUCCAAUGAUUCAUUUA	..(((.....(.(((((((((((&)))))))))))).....))).....	63	61
ENSG00000132561	MATN2	hsa-miR-7-5p	UGGAAGACUAGUGAUUUUGUUGU	ACAAGAAGUAUACACUAACUUGUA	((.(((..((((((((((.((((&)))).))).)).))))).))).))	62	324
ENSG00000132561	MATN2	hsa-miR-7-5p	UGGAAGACUAGUGAUUUUGUUGU	ACAAGAAGUAUACACUAACUUGUA	((.(((..((((((((((.((((&)))).))).)).))))).))).))	62	326
ENSG00000132561	MATN2	hsa-miR-7-5p	UGGAAGACUAGUGAUUUUGUUGU	ACAAGAAGUAUACACUAACUUGUA	((.(((..((((((((((.((((&)))).))).)).))))).))).))	62	328
ENSG00000132561	MATN2	hsa-miR-7-5p	UGGAAGACUAGUGAUUUUGUUGU	ACAAGAAGUAUACACUAACUUGUA	((.(((..((((((((((.((((&)))).))).)).))))).))).))	62	92
ENSG00000132561	MATN2	hsa-miR-7-5p	UGGAAGACUAGUGAUUUUGUUGU	ACAAGAAGUAUACACUAACUUGUA	((.(((..((((((((((.((((&)))).))).)).))))).))).))	62	328
ENSG00000132561	MATN2	hsa-miR-7-5p	UGGAAGACUAGUGAUUUUGUUGU	ACAAGAAGUAUACACUAACUUGUA	((.(((..((((((((((.((((&)))).))).)).))))).))).))	62	830
ENSG00000134758	RNF138	hsa-miR-7-5p	UGGAAGACUAGUGAUUUUGUUGU	GCAAUAACUUUCAUAGUUUCUUUCA	((((((((((.(((..(((((((&)))))))...))))))..)))))))	66	587
ENSG00000136826	KLF4	hsa-miR-7-5p	UGGAAGACUAGUGAUUUUGUUGU	ACAAGGAAGCCAAAGUUUUCAA	..(((((((..((.((((.((((&)))).)))).)).)))))))..	66	359
ENSG00000136826	KLF4	hsa-miR-7-5p	UGGAAGACUAGUGAUUUUGUUGU	ACAAGGAAGCCAAAGUUUUCAA	..(((((((..((.((((.((((&)))).)))).)).)))))))..	66	361
ENSG00000138639	ARHGAP24	hsa-miR-7-5p	UGGAAGACUAGUGAUUUUGUUGU	AUAAUAAAAAUACUACUCCCA	(((..((.(((((.(((((((((&))))))))).))))).)))))	75	3817
ENSG00000138639	ARHGAP24	hsa-miR-7-5p	UGGAAGACUAGUGAUUUUGUUGU	ACAAUAAGGCAAUGGUUUUGAGAGGCCA	...(((((((.((.(((((((((&))))))))))).))))))).........	66	4392
ENSG00000138639	ARHGAP24	hsa-miR-7-5p	UGGAAGACUAGUGAUUUUGUUGU	CCAACAACUGCACUUUAGAAUACCA	(((.(..((((((...((((((.&.))))))...))))..))..).)))	63	4787
ENSG00000138639	ARHGAP24	hsa-miR-7-5p	UGGAAGACUAGUGAUUUUGUUGU	ACAAUUCAGAAUCUUCUGAACCAUCUA	.((((((....(((..((((...&)))).)))...))))))..........	61	3293
ENSG00000138639	ARHGAP24	hsa-miR-7-5p	UGGAAGACUAGUGAUUUUGUUGU	AUAAUAAAAAUACUACUCCCA	(((..((.(((((.(((((((((&))))))))).))))).)))))	75	62
ENSG00000138639	ARHGAP24	hsa-miR-7-5p	UGGAAGACUAGUGAUUUUGUUGU	ACAAUAAGGCAAUGGUUUUGAGAGGCCA	...(((((((.((.(((((((((&))))))))))).))))))).........	66	637
ENSG00000138639	ARHGAP24	hsa-miR-7-5p	UGGAAGACUAGUGAUUUUGUUGU	CCAACAACUGCACUUUAGAAUACCA	(((.(..((((((...((((((.&.))))))...))))..))..).)))	63	1032
ENSG00000138735	PDE5A	hsa-miR-7-5p	UGGAAGACUAGUGAUUUUGUUGU	CCAGAAAAGUCCCCACUAUUUUACUA	(((.(((.((((((((((.(((.&.))).))))))...)))).))).)))	63	1732
ENSG00000138735	PDE5A	hsa-miR-7-5p	UGGAAGACUAGUGAUUUUGUUGU	CCAGAAAAGUCCCCACUAUUUUACUA	(((.(((.((((((((((.(((.&.))).))))))...)))).))).)))	63	1734
ENSG00000145012	LPP	hsa-miR-7-5p	UGGAAGACUAGUGAUUUUGUUGU	ACAACCAAGCUUCAAUAUUUUUCUA	(((((((.((.(((.((((((((&)))).))))..))).)).)))))))	71	15479
ENSG00000145012	LPP	hsa-miR-7-5p	UGGAAGACUAGUGAUUUUGUUGU	GCAAAGGAAUAACUAUUGUAUUUUCA	((((((((((((.(((((.((((&)))).))))).))))..)).))))))	69	10918
ENSG00000145012	LPP	hsa-miR-7-5p	UGGAAGACUAGUGAUUUUGUUGU	ACAAUGCCAAGUCACUCUUUUUUA	..(((((..((((((((.(((((&)))))...))))))))..))))).	68	13469
ENSG00000145012	LPP	hsa-miR-7-5p	UGGAAGACUAGUGAUUUUGUUGU	UCAGCAGAAUACUGCUUGCUUACA	.(.(((.(.((((.((((((((.&.)))))))))))))))).).....	66	13749
ENSG00000145012	LPP	hsa-miR-7-5p	UGGAAGACUAGUGAUUUUGUUGU	ACAGCAAUGCUCACUUAGUAAUUAUA	......((((((((..(((((((&)))))))...)))).)))).......	65	3306
ENSG00000145012	LPP	hsa-miR-7-5p	UGGAAGACUAGUGAUUUUGUUGU	ACUAUAAAAUGCAGUAACAUUCUA	(((((...((.(((((((((.((&)).))))))).)).))...)))))	65	13872
ENSG00000145012	LPP	hsa-miR-7-5p	UGGAAGACUAGUGAUUUUGUUGU	UCACCAAAAACCUCUCUGGAACUGUCA	.......((((.(((((((.((.&.)).)))))...)).))))........	61	6037
ENSG00000145012	LPP	hsa-miR-7-5p	UGGAAGACUAGUGAUUUUGUUGU	GCAGCAAGGGUACAUGUCCUUUG	.....(((..(((.(((((((((&))))))))).)))..))).....	61	8064
ENSG00000145012	LPP	hsa-miR-7-5p	UGGAAGACUAGUGAUUUUGUUGU	CCAGAGAAAUCCUUAUUCAUUUA	..(((....((.((((((.(((.&.))).))))))))..))).....	61	10021
ENSG00000145012	LPP	hsa-miR-7-5p	UGGAAGACUAGUGAUUUUGUUGU	GCAACUGAAAUUACAUAUUGCA	..........(((((((((((((&))))).))))))))........	61	15023
ENSG00000145012	LPP	hsa-miR-7-5p	UGGAAGACUAGUGAUUUUGUUGU	ACAAUAUCGACUUCUUACAGACUACCA	((..(((..((((((.((((...&)))).))).))))))..))........	60	6316
ENSG00000145012	LPP	hsa-miR-7-5p	UGGAAGACUAGUGAUUUUGUUGU	ACAACCAAGCUUCAAUAUUUUUCUA	(((((((.((.(((.((((((((&)))).))))..))).)).)))))))	71	15479
ENSG00000145012	LPP	hsa-miR-7-5p	UGGAAGACUAGUGAUUUUGUUGU	GCAAAGGAAUAACUAUUGUAUUUUCA	((((((((((((.(((((.((((&)))).))))).))))..)).))))))	69	10918
ENSG00000145012	LPP	hsa-miR-7-5p	UGGAAGACUAGUGAUUUUGUUGU	ACAAUGCCAAGUCACUCUUUUUUA	..(((((..((((((((.(((((&)))))...))))))))..))))).	68	13469
ENSG00000145012	LPP	hsa-miR-7-5p	UGGAAGACUAGUGAUUUUGUUGU	UCAGCAGAAUACUGCUUGCUUACA	.(.(((.(.((((.((((((((.&.)))))))))))))))).).....	66	13749
ENSG00000145012	LPP	hsa-miR-7-5p	UGGAAGACUAGUGAUUUUGUUGU	ACAGCAAUGCUCACUUAGUAAUUAUA	......((((((((..(((((((&)))))))...)))).)))).......	65	3306
ENSG00000145012	LPP	hsa-miR-7-5p	UGGAAGACUAGUGAUUUUGUUGU	ACUAUAAAAUGCAGUAACAUUCUA	(((((...((.(((((((((.((&)).))))))).)).))...)))))	65	13872
ENSG00000145012	LPP	hsa-miR-7-5p	UGGAAGACUAGUGAUUUUGUUGU	UCACCAAAAACCUCUCUGGAACUGUCA	.......((((.(((((((.((.&.)).)))))...)).))))........	61	6037
ENSG00000145012	LPP	hsa-miR-7-5p	UGGAAGACUAGUGAUUUUGUUGU	GCAGCAAGGGUACAUGUCCUUUG	.....(((..(((.(((((((((&))))))))).)))..))).....	61	8064
ENSG00000145012	LPP	hsa-miR-7-5p	UGGAAGACUAGUGAUUUUGUUGU	CCAGAGAAAUCCUUAUUCAUUUA	..(((....((.((((((.(((.&.))).))))))))..))).....	61	10021
ENSG00000145012	LPP	hsa-miR-7-5p	UGGAAGACUAGUGAUUUUGUUGU	GCAACUGAAAUUACAUAUUGCA	..........(((((((((((((&))))).))))))))........	61	15023
ENSG00000145012	LPP	hsa-miR-7-5p	UGGAAGACUAGUGAUUUUGUUGU	ACAAUAUCGACUUCUUACAGACUACCA	((..(((..((((((.((((...&)))).))).))))))..))........	60	6316
ENSG00000145012	LPP	hsa-miR-7-5p	UGGAAGACUAGUGAUUUUGUUGU	ACAACCAAGCUUCAAUAUUUUUCUA	(((((((.((.(((.((((((((&)))).))))..))).)).)))))))	71	15479
ENSG00000145012	LPP	hsa-miR-7-5p	UGGAAGACUAGUGAUUUUGUUGU	GCAAAGGAAUAACUAUUGUAUUUUCA	((((((((((((.(((((.((((&)))).))))).))))..)).))))))	69	10918
ENSG00000145012	LPP	hsa-miR-7-5p	UGGAAGACUAGUGAUUUUGUUGU	ACAAUGCCAAGUCACUCUUUUUUA	..(((((..((((((((.(((((&)))))...))))))))..))))).	68	13469
ENSG00000145012	LPP	hsa-miR-7-5p	UGGAAGACUAGUGAUUUUGUUGU	UCAGCAGAAUACUGCUUGCUUACA	.(.(((.(.((((.((((((((.&.)))))))))))))))).).....	66	13749
ENSG00000145012	LPP	hsa-miR-7-5p	UGGAAGACUAGUGAUUUUGUUGU	ACAGCAAUGCUCACUUAGUAAUUAUA	......((((((((..(((((((&)))))))...)))).)))).......	65	3306
ENSG00000145012	LPP	hsa-miR-7-5p	UGGAAGACUAGUGAUUUUGUUGU	ACUAUAAAAUGCAGUAACAUUCUA	(((((...((.(((((((((.((&)).))))))).)).))...)))))	65	13872
ENSG00000145012	LPP	hsa-miR-7-5p	UGGAAGACUAGUGAUUUUGUUGU	UCACCAAAAACCUCUCUGGAACUGUCA	.......((((.(((((((.((.&.)).)))))...)).))))........	61	6037
ENSG00000145012	LPP	hsa-miR-7-5p	UGGAAGACUAGUGAUUUUGUUGU	GCAGCAAGGGUACAUGUCCUUUG	.....(((..(((.(((((((((&))))))))).)))..))).....	61	8064
ENSG00000145012	LPP	hsa-miR-7-5p	UGGAAGACUAGUGAUUUUGUUGU	CCAGAGAAAUCCUUAUUCAUUUA	..(((....((.((((((.(((.&.))).))))))))..))).....	61	10021
ENSG00000145012	LPP	hsa-miR-7-5p	UGGAAGACUAGUGAUUUUGUUGU	GCAACUGAAAUUACAUAUUGCA	..........(((((((((((((&))))).))))))))........	61	15023
ENSG00000145012	LPP	hsa-miR-7-5p	UGGAAGACUAGUGAUUUUGUUGU	ACAAUAUCGACUUCUUACAGACUACCA	((..(((..((((((.((((...&)))).))).))))))..))........	60	6316
ENSG00000145012	LPP	hsa-miR-7-5p	UGGAAGACUAGUGAUUUUGUUGU	ACAUCAAAAUACACAAAAAGUUUAUUA	....(((((.(((((((((.(((&))).)))))).)))....)))))....	69	2244
ENSG00000145012	LPP	hsa-miR-7-5p	UGGAAGACUAGUGAUUUUGUUGU	ACAUAGAAAAUCCACGAAGGUUUCUA	(((((..((.((((((((.((((&))).).))))).)))..))..)))))	69	2274
ENSG00000145012	LPP	hsa-miR-7-5p	UGGAAGACUAGUGAUUUUGUUGU	ACAAGAGAGUCACAGAUGUCAA	.....(((..((((((((.((((&)))).))))))))....)))..	68	439
ENSG00000145012	LPP	hsa-miR-7-5p	UGGAAGACUAGUGAUUUUGUUGU	ACAAAAAGUUUAUUAAUGCUCUUGUCA	.(((..(.((((((.(((.((((&)))).))).)))))).)..))).....	65	2232
ENSG00000145012	LPP	hsa-miR-7-5p	UGGAAGACUAGUGAUUUUGUUGU	ACAACAGAGUGAGACCCUGUUUUUUUG	.(((((((...(.((((((((((&)))))))))).)......)))))))..	65	3966
ENSG00000145335	SNCA	hsa-miR-7-5p	UGGAAGACUAGUGAUUUUGUUGU	ACAAAAAGUUCUUUAAGUCAUAUA	.....((((...((.(((.((((&)))).))).))....)))).....	63	358
ENSG00000145335	SNCA	hsa-miR-7-5p	UGGAAGACUAGUGAUUUUGUUGU	ACAAUAAAUAAUAUUCGACCA	(((..((.((.....((((((((&))))))))...)).))..)))	61	1478
ENSG00000145335	SNCA	hsa-miR-7-5p	UGGAAGACUAGUGAUUUUGUUGU	ACAAAAAGUUCUUUAAGUCAUAUA	.....((((...((.(((.((((&)))).))).))....)))).....	63	331
ENSG00000145335	SNCA	hsa-miR-7-5p	UGGAAGACUAGUGAUUUUGUUGU	ACAAUAAAUAAUAUUCGACCA	(((..((.((.....((((((((&))))))))...)).))..)))	61	1451
ENSG00000145335	SNCA	hsa-miR-7-5p	UGGAAGACUAGUGAUUUUGUUGU	ACAAAAAGUUCUUUAAGUCAUAUA	.....((((...((.(((.((((&)))).))).))....)))).....	63	337
ENSG00000145335	SNCA	hsa-miR-7-5p	UGGAAGACUAGUGAUUUUGUUGU	ACAAUAAAUAAUAUUCGACCA	(((..((.((.....((((((((&))))))))...)).))..)))	61	1457
ENSG00000145335	SNCA	hsa-miR-7-5p	UGGAAGACUAGUGAUUUUGUUGU	ACAAAAAGUUCUUUAAGUCAUAUA	.....((((...((.(((.((((&)))).))).))....)))).....	63	337
ENSG00000145335	SNCA	hsa-miR-7-5p	UGGAAGACUAGUGAUUUUGUUGU	ACAAUAAAUAAUAUUCGACCA	(((..((.((.....((((((((&))))))))...)).))..)))	61	1457
ENSG00000145349	CAMK2D	hsa-miR-7-5p	UGGAAGACUAGUGAUUUUGUUGU	ACACCAAAUGAAGUGGUCAUCUA	((((.(((((.(...((((.(((&))).))))...).))))).))))	69	181
ENSG00000145349	CAMK2D	hsa-miR-7-5p	UGGAAGACUAGUGAUUUUGUUGU	GUAGCAAAUCAGUAUAUUCUA	(((((...((.((((((.((((.&.)))))))))).))..)))))	63	134
ENSG00000145349	CAMK2D	hsa-miR-7-5p	UGGAAGACUAGUGAUUUUGUUGU	CUAGCAAGAAUCACAUUCGUUUCCCA	.(((((....((((((((((((.&.)))).)))))))).....)))))..	67	575
ENSG00000145349	CAMK2D	hsa-miR-7-5p	UGGAAGACUAGUGAUUUUGUUGU	ACACCAAAUGAAGUGGUCAUCUA	((((.(((((.(...((((.(((&))).))))...).))))).))))	69	181
ENSG00000145349	CAMK2D	hsa-miR-7-5p	UGGAAGACUAGUGAUUUUGUUGU	GUAGCAAAUCAGUAUAUUCUA	(((((...((.((((((.((((.&.)))))))))).))..)))))	63	134
ENSG00000145423	SFRP2	hsa-miR-7-5p	UGGAAGACUAGUGAUUUUGUUGU	ACUAAUAAAAUCAUGAAUAUUUUUA	.((((.....((((((((((((.&..)))))))))))).....))))..	67	594
ENSG00000147459	DOCK5	hsa-miR-7-5p	UGGAAGACUAGUGAUUUUGUUGU	GCAGGAGAAUCAUUUGAACCUGCA	.........(((((((((.((((&)))).)))))))))..........	61	834
ENSG00000147459	DOCK5	hsa-miR-7-5p	UGGAAGACUAGUGAUUUUGUUGU	ACAAGGGACUUACCAGUCUGGAUUCA	....(((((.((((.(((.((((&)))).))).)))).))))).......	73	94
ENSG00000147459	DOCK5	hsa-miR-7-5p	UGGAAGACUAGUGAUUUUGUUGU	GCGCAAAUCACUGGCUACAA	..(.((.(((((((((((((...&))).)))))))))))).)..	62	116
ENSG00000147459	DOCK5	hsa-miR-7-5p	UGGAAGACUAGUGAUUUUGUUGU	ACAAGUAGAACAAACUGAGAAUUCCA	(((((..(((((..(((((((((&)))).)))))...))).))..)))))	65	101
ENSG00000147459	DOCK5	hsa-miR-7-5p	UGGAAGACUAGUGAUUUUGUUGU	ACAAGGGACUUACCAGUCUGGAUUCA	....(((((.((((.(((.((((&)))).))).)))).))))).......	73	3554
ENSG00000147459	DOCK5	hsa-miR-7-5p	UGGAAGACUAGUGAUUUUGUUGU	ACAUUAAAAUUAUGAAUAUGUCA	.....(((..(((((((((.(((&))).)))))))))......))).	63	560
ENSG00000147459	DOCK5	hsa-miR-7-5p	UGGAAGACUAGUGAUUUUGUUGU	GCGCAAAUCACUGGCUACAA	..(.((.(((((((((((((...&))).)))))))))))).)..	62	3576
ENSG00000147526	TACC1	hsa-miR-7-5p	UGGAAGACUAGUGAUUUUGUUGU	ACAACAGAAAUUAUCUGUCAUUUG	.....(((..(((((((((((((&))))))).))))))..))).....	72	3241
ENSG00000147526	TACC1	hsa-miR-7-5p	UGGAAGACUAGUGAUUUUGUUGU	ACAGCAAGAUCUUGUCUCAA	....((((....(((((((((((&)))))))))))..))))...	68	2251
ENSG00000147526	TACC1	hsa-miR-7-5p	UGGAAGACUAGUGAUUUUGUUGU	GCAGGAGGAUCACUUGAGUCCA	.....(((((((((((((.((((&)))).)))))))))..))))..	66	2446
ENSG00000147526	TACC1	hsa-miR-7-5p	UGGAAGACUAGUGAUUUUGUUGU	GCAGCUGGAGUGAAGCACUCAUUUUCCA	(((((((..((((((((((((((&))))).)))))....))))..)))))))	65	1593
ENSG00000147526	TACC1	hsa-miR-7-5p	UGGAAGACUAGUGAUUUUGUUGU	ACAACAGAAAUUAUCUGUCAUUUG	.....(((..(((((((((((((&))))))).))))))..))).....	72	988
ENSG00000147526	TACC1	hsa-miR-7-5p	UGGAAGACUAGUGAUUUUGUUGU	GCAGGAGGAUCACUUGAGUCCA	.....(((((((((((((.((((&)))).)))))))))..))))..	66	193
ENSG00000147526	TACC1	hsa-miR-7-5p	UGGAAGACUAGUGAUUUUGUUGU	ACAACAGAAAUUAUCUGUCAUUUG	.....(((..(((((((((((((&))))))).))))))..))).....	72	1006
ENSG00000147526	TACC1	hsa-miR-7-5p	UGGAAGACUAGUGAUUUUGUUGU	ACAGCAAGAUCUUGUCUCAA	....((((....(((((((((((&)))))))))))..))))...	68	16
ENSG00000147526	TACC1	hsa-miR-7-5p	UGGAAGACUAGUGAUUUUGUUGU	GCAGGAGGAUCACUUGAGUCCA	.....(((((((((((((.((((&)))).)))))))))..))))..	66	211
ENSG00000147526	TACC1	hsa-miR-7-5p	UGGAAGACUAGUGAUUUUGUUGU	ACAACAGAAAUUAUCUGUCAUUUG	.....(((..(((((((((((((&))))))).))))))..))).....	72	1006
ENSG00000147526	TACC1	hsa-miR-7-5p	UGGAAGACUAGUGAUUUUGUUGU	ACAGCAAGAUCUUGUCUCAA	....((((....(((((((((((&)))))))))))..))))...	68	16
ENSG00000147526	TACC1	hsa-miR-7-5p	UGGAAGACUAGUGAUUUUGUUGU	GCAGGAGGAUCACUUGAGUCCA	.....(((((((((((((.((((&)))).)))))))))..))))..	66	211
ENSG00000147526	TACC1	hsa-miR-7-5p	UGGAAGACUAGUGAUUUUGUUGU	ACAACAGAAAUUAUCUGUCAUUUG	.....(((..(((((((((((((&))))))).))))))..))).....	72	3241
ENSG00000147526	TACC1	hsa-miR-7-5p	UGGAAGACUAGUGAUUUUGUUGU	ACAGCAAGAUCUUGUCUCAA	....((((....(((((((((((&)))))))))))..))))...	68	2251
ENSG00000147526	TACC1	hsa-miR-7-5p	UGGAAGACUAGUGAUUUUGUUGU	GCAGGAGGAUCACUUGAGUCCA	.....(((((((((((((.((((&)))).)))))))))..))))..	66	2446
ENSG00000147526	TACC1	hsa-miR-7-5p	UGGAAGACUAGUGAUUUUGUUGU	GCAGCUGGAGUGAAGCACUCAUUUUCCA	(((((((..((((((((((((((&))))).)))))....))))..)))))))	65	1593
ENSG00000151090	THRB	hsa-miR-7-5p	UGGAAGACUAGUGAUUUUGUUGU	ACAAGGAAAAUAUUUUUUUUCA	..(((((..((((.((((.((((&)))).)))).))))..))))).	62	3982
ENSG00000151090	THRB	hsa-miR-7-5p	UGGAAGACUAGUGAUUUUGUUGU	GCAAAGAGUUGCCUGCUCUUCUCA	.(((((((..((((((((.((((&))))))))))))..).))))))..	64	984
ENSG00000151090	THRB	hsa-miR-7-5p	UGGAAGACUAGUGAUUUUGUUGU	ACAAGGAAAAUAUUUUUUUUCA	..(((((..((((.((((.((((&)))).)))).))))..))))).	62	5032
ENSG00000151090	THRB	hsa-miR-7-5p	UGGAAGACUAGUGAUUUUGUUGU	ACAACAUUCAUCUUCUCAUCUCA	.((((((....(((...((((((&)))))).))))))))).......	61	759
ENSG00000165338	HECTD2	hsa-miR-7-5p	UGGAAGACUAGUGAUUUUGUUGU	UCAGCAAAGGCAUAAUUUUCUA	(((((((...(((..(((((((.&.)))))))..)))..)))))))	70	2271
ENSG00000165338	HECTD2	hsa-miR-7-5p	UGGAAGACUAGUGAUUUUGUUGU	ACAAUAAUAACACUUGUGUCAA	.....(((.((((...(((((((&)))))))...))))...)))..	68	1415
ENSG00000165338	HECTD2	hsa-miR-7-5p	UGGAAGACUAGUGAUUUUGUUGU	AUAUUAAAAUUAUACAGUCAGUCA	(((..((((.(((((((((.(((&))).)))))))))..))))..)))	61	67
ENSG00000165338	HECTD2	hsa-miR-7-5p	UGGAAGACUAGUGAUUUUGUUGU	UCAGCAAAGGCAUAAUUUUCUA	(((((((...(((..(((((((.&.)))))))..)))..)))))))	70	2268
ENSG00000165338	HECTD2	hsa-miR-7-5p	UGGAAGACUAGUGAUUUUGUUGU	ACAAUAAUAACACUUGUGUCAA	.....(((.((((...(((((((&)))))))...))))...)))..	68	1412
ENSG00000165338	HECTD2	hsa-miR-7-5p	UGGAAGACUAGUGAUUUUGUUGU	AUAUUAAAAUUAUACAGUCAGUCA	(((..((((.(((((((((.(((&))).)))))))))..))))..)))	61	64
ENSG00000165338	HECTD2	hsa-miR-7-5p	UGGAAGACUAGUGAUUUUGUUGU	UCAGCAAAGGCAUAAUUUUCUA	(((((((...(((..(((((((.&.)))))))..)))..)))))))	70	2203
ENSG00000165338	HECTD2	hsa-miR-7-5p	UGGAAGACUAGUGAUUUUGUUGU	ACAAUAAUAACACUUGUGUCAA	.....(((.((((...(((((((&)))))))...))))...)))..	68	1347
ENSG00000166292	TMEM100	hsa-miR-7-5p	UGGAAGACUAGUGAUUUUGUUGU	AUAUAAAAGUCAACUGUACAUUUCA	(((((...((((((((((..(((&)))..)))))).))))....)))))	60	640
ENSG00000166292	TMEM100	hsa-miR-7-5p	UGGAAGACUAGUGAUUUUGUUGU	AUAUAAAAGUCAACUGUACAUUUCA	(((((...((((((((((..(((&)))..)))))).))))....)))))	60	319
ENSG00000166869	CHP2	hsa-miR-7-5p	UGGAAGACUAGUGAUUUUGUUGU	GCAUCAGGGACAGUUUUUCCA	.((((((((.((..(((((.(((&))).)))))))))))))))..	61	1160
ENSG00000171044	XKR6	hsa-miR-7-5p	UGGAAGACUAGUGAUUUUGUUGU	CUAGCAAGAAUCACAUUCGUUUCCCA	.(((((....((((((((((((.&.)))).)))))))).....)))))..	67	1053
ENSG00000172915	NBEA	hsa-miR-7-5p	UGGAAGACUAGUGAUUUUGUUGU	ACAACAAUAACUGAAGUUAUUCUUUUA	.(((((((((((....(((((((&)))))))..)))..)))).))))....	63	686
ENSG00000172915	NBEA	hsa-miR-7-5p	UGGAAGACUAGUGAUUUUGUUGU	ACAACAAUAACUGAAGUUAUUCUUUUA	.(((((((((((....(((((((&)))))))..)))..)))).))))....	63	687
ENSG00000172915	NBEA	hsa-miR-7-5p	UGGAAGACUAGUGAUUUUGUUGU	ACAACAAUAACUGAAGUUAUUCUUUUA	.(((((((((((....(((((((&)))))))..)))..)))).))))....	63	686
ENSG00000172915	NBEA	hsa-miR-7-5p	UGGAAGACUAGUGAUUUUGUUGU	ACAACAAUAACUGAAGUUAUUCUUUUA	.(((((((((((....(((((((&)))))))..)))..)))).))))....	63	686
ENSG00000172915	NBEA	hsa-miR-7-5p	UGGAAGACUAGUGAUUUUGUUGU	ACAACAAUAACUGAAGUUAUUCUUUUA	.(((((((((((....(((((((&)))))))..)))..)))).))))....	63	686
ENSG00000182836	PLCXD3	hsa-miR-7-5p	UGGAAGACUAGUGAUUUUGUUGU	ACAGUGAGAUCAAAGGCUGGUUUCUA	((((.((((((((((((((((((&)))))))))))....)))))))))))	74	492
ENSG00000182836	PLCXD3	hsa-miR-7-5p	UGGAAGACUAGUGAUUUUGUUGU	ACAAUAGAACCAGUACACCUUUA	..((((..((.((.(((((((((&))))))))).)).))...)))).	65	1841
ENSG00000182836	PLCXD3	hsa-miR-7-5p	UGGAAGACUAGUGAUUUUGUUGU	ACAGCACUUUAGUCUUUUCA	.((((((((((.(....((((((&))))))).))))))))))..	65	2437
ENSG00000182836	PLCXD3	hsa-miR-7-5p	UGGAAGACUAGUGAUUUUGUUGU	UCAUACAGACUAAUUUGUUUUCAUCA	..((((((.(((...(((((((.&.)).)))))...))).))))))....	63	1864
ENSG00000182836	PLCXD3	hsa-miR-7-5p	UGGAAGACUAGUGAUUUUGUUGU	ACACACAGAAUGCACAUUUCACA	..........(((((((((((((&))).))))))).)))........	60	3037
ENSG00000182836	PLCXD3	hsa-miR-7-5p	UGGAAGACUAGUGAUUUUGUUGU	GCAUCAAAUCAGUUUCCA	(((((....(.((((((.(.(((&))).))))))).))))))	62	6099
ENSG00000182836	PLCXD3	hsa-miR-7-5p	UGGAAGACUAGUGAUUUUGUUGU	AUGAUGACCUCAAUAUUGACUUUCA	((((((.(...(((..(((((((&)))))))..))).....).))))))	61	3172
ENSG00000182836	PLCXD3	hsa-miR-7-5p	UGGAAGACUAGUGAUUUUGUUGU	CUAAUAAAGUCCUGGUACCA	(((...(((((.((((((((((.&.))))))))))))))).)))	60	2
ENSG00000182836	PLCXD3	hsa-miR-7-5p	UGGAAGACUAGUGAUUUUGUUGU	ACAGUACAAUUCUUCUUUUCAA	.((((((...(((...((((...&)))))))...))))))......	60	4547
ENSG00000182836	PLCXD3	hsa-miR-7-5p	UGGAAGACUAGUGAUUUUGUUGU	AUAAUAGUGUUUCACAGUAUUUCUA	(((((((((.((((..(((((((&)))))))....))))))).))))))	60	6025
ENSG00000182836	PLCXD3	hsa-miR-7-5p	UGGAAGACUAGUGAUUUUGUUGU	ACAGUGAGAUCAAAGGCUGGUUUCUA	((((.((((((((((((((((((&)))))))))))....)))))))))))	74	489
ENSG00000182836	PLCXD3	hsa-miR-7-5p	UGGAAGACUAGUGAUUUUGUUGU	ACAAUAGAACCAGUACACCUUUA	..((((..((.((.(((((((((&))))))))).)).))...)))).	65	1838
ENSG00000182836	PLCXD3	hsa-miR-7-5p	UGGAAGACUAGUGAUUUUGUUGU	ACAGCACUUUAGUCUUUUCA	.((((((((((.(....((((((&))))))).))))))))))..	65	2434
ENSG00000182836	PLCXD3	hsa-miR-7-5p	UGGAAGACUAGUGAUUUUGUUGU	UCAUACAGACUAAUUUGUUUUCAUCA	..((((((.(((...(((((((.&.)).)))))...))).))))))....	63	1861
ENSG00000182836	PLCXD3	hsa-miR-7-5p	UGGAAGACUAGUGAUUUUGUUGU	ACACACAGAAUGCACAUUUCACA	..........(((((((((((((&))).))))))).)))........	60	3034
ENSG00000182836	PLCXD3	hsa-miR-7-5p	UGGAAGACUAGUGAUUUUGUUGU	GCAUCAAAUCAGUUUCCA	(((((....(.((((((.(.(((&))).))))))).))))))	62	5906
ENSG00000182836	PLCXD3	hsa-miR-7-5p	UGGAAGACUAGUGAUUUUGUUGU	AUGAUGACCUCAAUAUUGACUUUCA	((((((.(...(((..(((((((&)))))))..))).....).))))))	61	3169
ENSG00000182836	PLCXD3	hsa-miR-7-5p	UGGAAGACUAGUGAUUUUGUUGU	ACAGUACAAUUCUUCUUUUCAA	.((((((...(((...((((...&)))))))...))))))......	60	4544
ENSG00000182836	PLCXD3	hsa-miR-7-5p	UGGAAGACUAGUGAUUUUGUUGU	AUAAUAGUGUUUCACAGUAUUUCUA	(((((((((.((((..(((((((&)))))))....))))))).))))))	60	5832
ENSG00000198846	TOX	hsa-miR-7-5p	UGGAAGACUAGUGAUUUUGUUGU	ACAGCUAAAUUACAACUUUUACA	((((((....(((((((.(((((&))))).)))))))..))))))..	79	1473
ENSG00000198846	TOX	hsa-miR-7-5p	UGGAAGACUAGUGAUUUUGUUGU	AUAACAGAAUUGCCCUCCA	((((.(....(((((((((((((&)))))))))))))).))))	61	1117
ENSG00000198961	PJA2	hsa-miR-7-5p	UGGAAGACUAGUGAUUUUGUUGU	ACAGCAAAAUACUGUGUAUCCUUUUA	.(((..(((((((.(((((((((&)))))))))))))).)).))).....	70	1164
ENSG00000198961	PJA2	hsa-miR-7-5p	UGGAAGACUAGUGAUUUUGUUGU	ACAGCAAAAUACUGUGUAUCCUUUUA	.(((..(((((((.(((((((((&)))))))))))))).)).))).....	70	1168
ENSG00000206579	XKR4	hsa-miR-7-5p	UGGAAGACUAGUGAUUUUGUUGU	ACAACAAGCUUCUGGGUUUUAA	..(((..((((....((((((((&))))))))...))))..)))..	66	574
ENSG00000206579	XKR4	hsa-miR-7-5p	UGGAAGACUAGUGAUUUUGUUGU	ACAGCAAACCCAAAUGUUGUCUA	((((.(((...((..((((((((&))))))))..))...))).))))	65	1312
ENSG00000206579	XKR4	hsa-miR-7-5p	UGGAAGACUAGUGAUUUUGUUGU	GCAGCACAAUCAUAGUUUUCUG	.(((((((((.(((((.((((((&)))))).)))))))))))))).	84	11052
ENSG00000206579	XKR4	hsa-miR-7-5p	UGGAAGACUAGUGAUUUUGUUGU	ACAAUAAAAGAACGUAAAGCCUUAUUUCCA	((((((....((..(((((((((&)))))))))..))...........))))))	67	3158
ENSG00000206579	XKR4	hsa-miR-7-5p	UGGAAGACUAGUGAUUUUGUUGU	GCAAGAAAGAAACACAGCUUUUCUA	(((((((((.(((.((((.((((&)))).))))...))))).)))))))	60	10950
ENSG00000206579	XKR4	hsa-miR-7-5p	UGGAAGACUAGUGAUUUUGUUGU	ACAACAAGCUUCUGGGUUUUAA	..(((..((((....((((((((&))))))))...))))..)))..	66	16479
ENSG00000206579	XKR4	hsa-miR-7-5p	UGGAAGACUAGUGAUUUUGUUGU	CCCAAAAUGACUAUGUCCUUUA	.....(((((((.((((((....&..)))))).)))).))).....	65	14436
ENSG00000206579	XKR4	hsa-miR-7-5p	UGGAAGACUAGUGAUUUUGUUGU	ACAGCAAACCCAAAUGUUGUCUA	((((.(((...((..((((((((&))))))))..))...))).))))	65	17217
ENSG00000206579	XKR4	hsa-miR-7-5p	UGGAAGACUAGUGAUUUUGUUGU	GCAGAGAAUACAAUGGUUCUUCAUCA	..((((((((.(((((((.((((&))))))))).)).))).)))))....	64	3582
ENSG00000206579	XKR4	hsa-miR-7-5p	UGGAAGACUAGUGAUUUUGUUGU	ACACAAAGUAGUCCAGUUCUCUA	((((..(((.(((..........&.)))..)))..))))........	64	15827
ENSG00000206579	XKR4	hsa-miR-7-5p	UGGAAGACUAGUGAUUUUGUUGU	GCAAUGAGAUUCAGGGUUACCA	(((..((((...(((((((((((&)))))))))))...)))).)))	60	6018
ENSG00000049246	PER3	hsa-miR-93-5p	CAAAGUGCUGUUCGUGCAGGUAG	CUGUAUGAAUGGAAAUCAUUUUG	(((((((((((((((((((....&))))))))))))....)))))))	73	172
ENSG00000049246	PER3	hsa-miR-93-5p	CAAAGUGCUGUUCGUGCAGGUAG	CUGUAUGAAUGGAAAUCAUUUUG	(((((((((((((((((((....&))))))))))))....)))))))	73	172
ENSG00000049246	PER3	hsa-miR-93-5p	CAAAGUGCUGUUCGUGCAGGUAG	CUGUAUGAAUGGAAAUCAUUUUG	(((((((((((((((((((....&))))))))))))....)))))))	73	171
ENSG00000049246	PER3	hsa-miR-93-5p	CAAAGUGCUGUUCGUGCAGGUAG	CUGUAUGAAUGGAAAUCAUUUUG	(((((((((((((((((((....&))))))))))))....)))))))	73	171
ENSG00000053254	FOXN3	hsa-miR-93-5p	CAAAGUGCUGUUCGUGCAGGUAG	CUUUUUGCAUAAAUACCUCAUCG	....(((.((((.(((((((.((&)).))))))).))))...)))..	63	3257
ENSG00000065559	MAP2K4	hsa-miR-93-5p	CAAAGUGCUGUUCGUGCAGGUAG	CUACUGGAAUGGUGUUUUG	(((((((((((((...(((.(((&)))))))))))))))))))	67	2214
ENSG00000065559	MAP2K4	hsa-miR-93-5p	CAAAGUGCUGUUCGUGCAGGUAG	CACCUGCUAGAACCUCUCGUAG	.........((((..((((((..&.))))))..)))).........	66	1182
ENSG00000065559	MAP2K4	hsa-miR-93-5p	CAAAGUGCUGUUCGUGCAGGUAG	AUACCUGAUUGAUCACACAGUG	....(((.((.(((..((((((.&.))))))..))).)))))....	66	2374
ENSG00000065559	MAP2K4	hsa-miR-93-5p	CAAAGUGCUGUUCGUGCAGGUAG	UUGCUCGCCCAGACACCAUGUG	....((((((..((.((((....&)))).))..))).)))......	60	2463
ENSG00000065559	MAP2K4	hsa-miR-93-5p	CAAAGUGCUGUUCGUGCAGGUAG	CUACUGGAAUGGUGUUUUG	(((((((((((((...(((.(((&)))))))))))))))))))	67	5
ENSG00000065559	MAP2K4	hsa-miR-93-5p	CAAAGUGCUGUUCGUGCAGGUAG	AUACCUGAUUGAUCACACAGUG	....(((.((.(((..((((((.&.))))))..))).)))))....	66	165
ENSG00000065559	MAP2K4	hsa-miR-93-5p	CAAAGUGCUGUUCGUGCAGGUAG	UUGCUCGCCCAGACACCAUGUG	....((((((..((.((((....&)))).))..))).)))......	60	254
ENSG00000065559	MAP2K4	hsa-miR-93-5p	CAAAGUGCUGUUCGUGCAGGUAG	CUACUGGAAUGGUGUUUUG	(((((((((((((...(((.(((&)))))))))))))))))))	67	2207
ENSG00000065559	MAP2K4	hsa-miR-93-5p	CAAAGUGCUGUUCGUGCAGGUAG	CACCUGCUAGAACCUCUCGUAG	.........((((..((((((..&.))))))..)))).........	66	1175
ENSG00000065559	MAP2K4	hsa-miR-93-5p	CAAAGUGCUGUUCGUGCAGGUAG	AUACCUGAUUGAUCACACAGUG	....(((.((.(((..((((((.&.))))))..))).)))))....	66	2367
ENSG00000065559	MAP2K4	hsa-miR-93-5p	CAAAGUGCUGUUCGUGCAGGUAG	UUGCUCGCCCAGACACCAUGUG	....((((((..((.((((....&)))).))..))).)))......	60	2456
ENSG00000079335	CDC14A	hsa-miR-93-5p	CAAAGUGCUGUUCGUGCAGGUAG	CUGCUGCACACGCUAGCAUAUCUG	....(((((((..((((((.(((&)))))))))..)).))))).....	68	941
ENSG00000079335	CDC14A	hsa-miR-93-5p	CAAAGUGCUGUUCGUGCAGGUAG	UUGCCUGUAAUCACACAUGGUUUG	....(((.(((...((((((((.&.))))))))...))))))......	64	1063
ENSG00000100307	CBX7	hsa-miR-93-5p	CAAAGUGCUGUUCGUGCAGGUAG	CACCUGCACUCACCCCACCUUG	(((.(((..((..((((((((..&.))))))))..))..))).)))	82	2285
ENSG00000100307	CBX7	hsa-miR-93-5p	CAAAGUGCUGUUCGUGCAGGUAG	CUUUCUGCAUGGGGUGCUCUGUUG	((.((((((..(((((((((.((&)).))))))))))))))).))...	77	1401
ENSG00000100307	CBX7	hsa-miR-93-5p	CAAAGUGCUGUUCGUGCAGGUAG	CUAUUUGCGCAAUCUGUGGGUCUG	.............((((((((((&))))))))))..............	61	953
ENSG00000101745	ANKRD12	hsa-miR-93-5p	CAAAGUGCUGUUCGUGCAGGUAG	GAAUCUGCUAACAGCGCUGGAAGUUG	...(((((((((...((((((..&..)))))).)))))))))........	63	2328
ENSG00000101745	ANKRD12	hsa-miR-93-5p	CAAAGUGCUGUUCGUGCAGGUAG	AUACCUGUAAAACUGUUUUG	......((.(((..((((((((.&.)))))))).))).))....	62	2009
ENSG00000109943	CRTAM	hsa-miR-93-5p	CAAAGUGCUGUUCGUGCAGGUAG	UUACCUGGAAAUUCCAUGACCAAUACAUGUG	....(((.((.(((((((((((.&.)))))).......))))).)).))).....	61	253
ENSG00000109943	CRTAM	hsa-miR-93-5p	CAAAGUGCUGUUCGUGCAGGUAG	CACCUGUAGUCUCAGAUACUUGG	..((((((((....(((((((..&.)))))))....))).)))))..	62	608
ENSG00000109943	CRTAM	hsa-miR-93-5p	CAAAGUGCUGUUCGUGCAGGUAG	UUACCUGGAAAUUCCAUGACCAAUACAUGUG	....(((.((.(((((((((((.&.)))))).......))))).)).))).....	61	255
ENSG00000109943	CRTAM	hsa-miR-93-5p	CAAAGUGCUGUUCGUGCAGGUAG	CACCUGUAGUCUCAGAUACUUGG	..((((((((....(((((((..&.)))))))....))).)))))..	62	610
ENSG00000112773	FAM46A	hsa-miR-93-5p	CAAAGUGCUGUUCGUGCAGGUAG	CGGCUUGCUCCAAAUGAACAGUAGUAGGUUG	...(.((((((((((((((((..&..)))))).....)))))))))).)......	65	3374
ENSG00000112773	FAM46A	hsa-miR-93-5p	CAAAGUGCUGUUCGUGCAGGUAG	CAAGCUGCACCUUGGGUCACUCUUUUG	...((((((....((((((.(..&..).))))))....)).))))......	63	169
ENSG00000112773	FAM46A	hsa-miR-93-5p	CAAAGUGCUGUUCGUGCAGGUAG	CAUGCCUGCUUUGAGGUGUUCUGUUG	...((.((..((((.(((((((.&..)))))))..))))..)).))....	61	199
ENSG00000112773	FAM46A	hsa-miR-93-5p	CAAAGUGCUGUUCGUGCAGGUAG	CCUUGCAGAACGGAGGAGGCUCUG	.......((((((.((((((...&.))))))))))))...........	60	261
ENSG00000112773	FAM46A	hsa-miR-93-5p	CAAAGUGCUGUUCGUGCAGGUAG	CGGCUUGCUCCAAAUGAACAGUAGUAGGUUG	...(.((((((((((((((((..&..)))))).....)))))))))).)......	65	3374
ENSG00000112773	FAM46A	hsa-miR-93-5p	CAAAGUGCUGUUCGUGCAGGUAG	CAAGCUGCACCUUGGGUCACUCUUUUG	...((((((....((((((.(..&..).))))))....)).))))......	63	169
ENSG00000112773	FAM46A	hsa-miR-93-5p	CAAAGUGCUGUUCGUGCAGGUAG	CAUGCCUGCUUUGAGGUGUUCUGUUG	...((.((..((((.(((((((.&..)))))))..))))..)).))....	61	199
ENSG00000112773	FAM46A	hsa-miR-93-5p	CAAAGUGCUGUUCGUGCAGGUAG	CCUUGCAGAACGGAGGAGGCUCUG	.......((((((.((((((...&.))))))))))))...........	60	261
ENSG00000112773	FAM46A	hsa-miR-93-5p	CAAAGUGCUGUUCGUGCAGGUAG	CAAUCUGCAAGAAUUUUAAGUUG	(((......((((.(((((((..&..))))))).))))......)))	67	147
ENSG00000112773	FAM46A	hsa-miR-93-5p	CAAAGUGCUGUUCGUGCAGGUAG	CGGCUUGCUCCAAAUGAACAGUAGUAGGUUG	...(.((((((((((((((((..&..)))))).....)))))))))).)......	65	3374
ENSG00000112773	FAM46A	hsa-miR-93-5p	CAAAGUGCUGUUCGUGCAGGUAG	CAAGCUGCACCUUGGGUCACUCUUUUG	...((((((....((((((.(..&..).))))))....)).))))......	63	169
ENSG00000112773	FAM46A	hsa-miR-93-5p	CAAAGUGCUGUUCGUGCAGGUAG	CAUGCCUGCUUUGAGGUGUUCUGUUG	...((.((..((((.(((((((.&..)))))))..))))..)).))....	61	199
ENSG00000112773	FAM46A	hsa-miR-93-5p	CAAAGUGCUGUUCGUGCAGGUAG	CCUUGCAGAACGGAGGAGGCUCUG	.......((((((.((((((...&.))))))))))))...........	60	261
ENSG00000115525	ST3GAL5	hsa-miR-93-5p	CAAAGUGCUGUUCGUGCAGGUAG	UUACACUGCACAUUGAAUACAGGUAACUAAUUG	.....((.((((((((((((((.&.))).))))))...)))))))............	67	650
ENSG00000115525	ST3GAL5	hsa-miR-93-5p	CAAAGUGCUGUUCGUGCAGGUAG	UUACACUGCACAUUGAAUACAGGUAACUAAUUG	.....((.((((((((((((((.&.))).))))))...)))))))............	67	650
ENSG00000115525	ST3GAL5	hsa-miR-93-5p	CAAAGUGCUGUUCGUGCAGGUAG	UUACACUGCACAUUGAAUACAGGUAACUAAUUG	.....((.((((((((((((((.&.))).))))))...)))))))............	67	650
ENSG00000118432	CNR1	hsa-miR-93-5p	CAAAGUGCUGUUCGUGCAGGUAG	CUGCCUGCUGAACUCCACCGUG	....(((..(((((.((((((((&)))))))))))))..)))....	82	243
ENSG00000118432	CNR1	hsa-miR-93-5p	CAAAGUGCUGUUCGUGCAGGUAG	CACCUUCACGGUCCUGGAGAACCUCCUG	...........(((((.((((..&.)))).)))))....((((...))))..	62	1011
ENSG00000118922	KLF12	hsa-miR-93-5p	CAAAGUGCUGUUCGUGCAGGUAG	CCACCUGCCACUUAAAAUGACUUAG	..(((((........((((((..&..)))))))))))............	67	953
ENSG00000118922	KLF12	hsa-miR-93-5p	CAAAGUGCUGUUCGUGCAGGUAG	CUAUAUGCAACUCCUACUUCACAUUG	(((.(((..((...((((.((((&)))).))))......))..))).)))	61	7192
ENSG00000122707	RECK	hsa-miR-93-5p	CAAAGUGCUGUUCGUGCAGGUAG	CUAUUUGAUGUAAUACUUCUUGUG	..(((((.....(((.(((((((&))))))))))...)))))......	60	240
ENSG00000132561	MATN2	hsa-miR-93-5p	CAAAGUGCUGUUCGUGCAGGUAG	AGACCUGCAUAAGAAUGUUACUAGG	...((((.(((((((((((((..&..))))))))..))))).))))...	63	141
ENSG00000138639	ARHGAP24	hsa-miR-93-5p	CAAAGUGCUGUUCGUGCAGGUAG	CUGUUUGUGCCAAUAGACUUUG	((((((.(((((.((((((((((&)))))))))).)))))))))))	82	5225
ENSG00000138639	ARHGAP24	hsa-miR-93-5p	CAAAGUGCUGUUCGUGCAGGUAG	UUGCCUCACAACCCUGCUUACAUUG	..(((((..(((.(((.(((((.&.)))))))))))..)))))......	63	1882
ENSG00000138639	ARHGAP24	hsa-miR-93-5p	CAAAGUGCUGUUCGUGCAGGUAG	AUACCAGCAGUGAAAUGGUAUUACUG	...((((((((((((((.((((.&.)))).))).)).)))))))))....	61	4767
ENSG00000138639	ARHGAP24	hsa-miR-93-5p	CAAAGUGCUGUUCGUGCAGGUAG	CUGUUUGUGCCAAUAGACUUUG	((((((.(((((.((((((((((&)))))))))).)))))))))))	82	1470
ENSG00000138639	ARHGAP24	hsa-miR-93-5p	CAAAGUGCUGUUCGUGCAGGUAG	AUACCAGCAGUGAAAUGGUAUUACUG	...((((((((((((((.((((.&.)))).))).)).)))))))))....	61	1012
ENSG00000138735	PDE5A	hsa-miR-93-5p	CAAAGUGCUGUUCGUGCAGGUAG	CUACCAGUAAACAAACAUCCUGUCUUUUUG	((..(((.((((..(((.(((((&))))).)))))))..)))..))........	69	677
ENSG00000138735	PDE5A	hsa-miR-93-5p	CAAAGUGCUGUUCGUGCAGGUAG	CUGUCUGUAUAGUGUCUGUAUUUGG	..((((((.(...((((((((((&)))))))))).....).))))))..	61	4108
ENSG00000138735	PDE5A	hsa-miR-93-5p	CAAAGUGCUGUUCGUGCAGGUAG	CUACCAGUAAACAAACAUCCUGUCUUUUUG	((..(((.((((..(((.(((((&))))).)))))))..)))..))........	69	679
ENSG00000138735	PDE5A	hsa-miR-93-5p	CAAAGUGCUGUUCGUGCAGGUAG	CUGUCUGUAUAGUGUCUGUAUUUGG	..((((((.(...((((((((((&)))))))))).....).))))))..	61	4110
ENSG00000145012	LPP	hsa-miR-93-5p	CAAAGUGCUGUUCGUGCAGGUAG	UUACCUGACUGAAGCUACUAUG	...((((((..(((..((((((.&.))))))..)))))).)))...	73	11450
ENSG00000145012	LPP	hsa-miR-93-5p	CAAAGUGCUGUUCGUGCAGGUAG	CUACCUGAACAUUGUAAUACAGACAAACUUG	..((((..((((.((((((((((&)))))))..........))).)))).)))).	65	15347
ENSG00000145012	LPP	hsa-miR-93-5p	CAAAGUGCUGUUCGUGCAGGUAG	AUAGCAGCAUGAUUUAUAAUCCUUUG	....((((((((...........&..))))))))................	63	5029
ENSG00000145012	LPP	hsa-miR-93-5p	CAAAGUGCUGUUCGUGCAGGUAG	CUACCUUAGUAUUUCACAUUUG	..((((((((.......((((((&))))))))))))))........	63	12245
ENSG00000145012	LPP	hsa-miR-93-5p	CAAAGUGCUGUUCGUGCAGGUAG	CUGCUUGCUUACAAUCUUUAUUAUG	.((((...(((....((((((((&))))))))..)))..))))......	63	13737
ENSG00000145012	LPP	hsa-miR-93-5p	CAAAGUGCUGUUCGUGCAGGUAG	GUACCCAGAGUCGUACUGUG	...(((((..(((.((..((((.&.)))))))))..)))))...	60	1975
ENSG00000145012	LPP	hsa-miR-93-5p	CAAAGUGCUGUUCGUGCAGGUAG	UUACCUGACUGAAGCUACUAUG	...((((((..(((..((((((.&.))))))..)))))).)))...	73	11450
ENSG00000145012	LPP	hsa-miR-93-5p	CAAAGUGCUGUUCGUGCAGGUAG	CUACCUGAACAUUGUAAUACAGACAAACUUG	..((((..((((.((((((((((&)))))))..........))).)))).)))).	65	15347
ENSG00000145012	LPP	hsa-miR-93-5p	CAAAGUGCUGUUCGUGCAGGUAG	AUAGCAGCAUGAUUUAUAAUCCUUUG	....((((((((...........&..))))))))................	63	5029
ENSG00000145012	LPP	hsa-miR-93-5p	CAAAGUGCUGUUCGUGCAGGUAG	CUACCUUAGUAUUUCACAUUUG	..((((((((.......((((((&))))))))))))))........	63	12245
ENSG00000145012	LPP	hsa-miR-93-5p	CAAAGUGCUGUUCGUGCAGGUAG	CUGCUUGCUUACAAUCUUUAUUAUG	.((((...(((....((((((((&))))))))..)))..))))......	63	13737
ENSG00000145012	LPP	hsa-miR-93-5p	CAAAGUGCUGUUCGUGCAGGUAG	GUACCCAGAGUCGUACUGUG	...(((((..(((.((..((((.&.)))))))))..)))))...	60	1975
ENSG00000145012	LPP	hsa-miR-93-5p	CAAAGUGCUGUUCGUGCAGGUAG	UUACCUGACUGAAGCUACUAUG	...((((((..(((..((((((.&.))))))..)))))).)))...	73	11450
ENSG00000145012	LPP	hsa-miR-93-5p	CAAAGUGCUGUUCGUGCAGGUAG	CUACCUGAACAUUGUAAUACAGACAAACUUG	..((((..((((.((((((((((&)))))))..........))).)))).)))).	65	15347
ENSG00000145012	LPP	hsa-miR-93-5p	CAAAGUGCUGUUCGUGCAGGUAG	AUAGCAGCAUGAUUUAUAAUCCUUUG	....((((((((...........&..))))))))................	63	5029
ENSG00000145012	LPP	hsa-miR-93-5p	CAAAGUGCUGUUCGUGCAGGUAG	CUACCUUAGUAUUUCACAUUUG	..((((((((.......((((((&))))))))))))))........	63	12245
ENSG00000145012	LPP	hsa-miR-93-5p	CAAAGUGCUGUUCGUGCAGGUAG	CUGCUUGCUUACAAUCUUUAUUAUG	.((((...(((....((((((((&))))))))..)))..))))......	63	13737
ENSG00000145012	LPP	hsa-miR-93-5p	CAAAGUGCUGUUCGUGCAGGUAG	GUACCCAGAGUCGUACUGUG	...(((((..(((.((..((((.&.)))))))))..)))))...	60	1975
ENSG00000145012	LPP	hsa-miR-93-5p	CAAAGUGCUGUUCGUGCAGGUAG	CUAAUUGCAUGAAUGAAUAUAUAUUG	.........((((((((((.(((&))).))))))))))............	61	2032
ENSG00000145012	LPP	hsa-miR-93-5p	CAAAGUGCUGUUCGUGCAGGUAG	GUGCCUGCAGUCCCAGCUACUCAG	...(((((((....((((((((.&.))))))))....)))).)))...	65	4090
ENSG00000145335	SNCA	hsa-miR-93-5p	CAAAGUGCUGUUCGUGCAGGUAG	CUGAUAGCAGUGACCUAGAACAAUUUG	....((((((((.((.(((....&))))))))))).)).............	61	535
ENSG00000145335	SNCA	hsa-miR-93-5p	CAAAGUGCUGUUCGUGCAGGUAG	CUACCUGACCCUCCCCUUGUG	.............((.(((((((&)))))))))............	60	271
ENSG00000145335	SNCA	hsa-miR-93-5p	CAAAGUGCUGUUCGUGCAGGUAG	CUGAUAGCAGUGACCUAGAACAAUUUG	....((((((((.((.(((....&))))))))))).)).............	61	508
ENSG00000145335	SNCA	hsa-miR-93-5p	CAAAGUGCUGUUCGUGCAGGUAG	CUGAUAGCAGUGACCUAGAACAAUUUG	....((((((((.((.(((....&))))))))))).)).............	61	514
ENSG00000145335	SNCA	hsa-miR-93-5p	CAAAGUGCUGUUCGUGCAGGUAG	CUGAUAGCAGUGACCUAGAACAAUUUG	....((((((((.((.(((....&))))))))))).)).............	61	514
ENSG00000145349	CAMK2D	hsa-miR-93-5p	CAAAGUGCUGUUCGUGCAGGUAG	CUCCUGUCAACCACAUUGUUUUG	(((.(((..(((...(((((...&..))))).)))))).))).....	64	738
ENSG00000145349	CAMK2D	hsa-miR-93-5p	CAAAGUGCUGUUCGUGCAGGUAG	CUACCUCAGAUAUCAUUUG	..(((((.((((..((.((((((&)))))))))))).))))).	65	221
ENSG00000145349	CAMK2D	hsa-miR-93-5p	CAAAGUGCUGUUCGUGCAGGUAG	CUCCUGUCAACCACAUUGUUUUG	(((.(((..(((...(((((...&..))))).)))))).))).....	64	738
ENSG00000147459	DOCK5	hsa-miR-93-5p	CAAAGUGCUGUUCGUGCAGGUAG	CUGCCUGUAGUCCCAGCUACUCAG	...(((((((....(((((((((&)))))))))....)))).)))...	69	867
ENSG00000147459	DOCK5	hsa-miR-93-5p	CAAAGUGCUGUUCGUGCAGGUAG	CUCCCUGCUGACUGCAUUUCCUG	..((((((.(((...(((((.((&)).))))).))).))))))....	75	849
ENSG00000147459	DOCK5	hsa-miR-93-5p	CAAAGUGCUGUUCGUGCAGGUAG	CAGCCUGUACGGCAGAGACAUGG	.......((((.(((((((((..&..)))))))))))))........	70	657
ENSG00000147459	DOCK5	hsa-miR-93-5p	CAAAGUGCUGUUCGUGCAGGUAG	AUAUCUGUACAAGCUUCGAGAUUUG	((((.((..(((.(((((((((.&.))))))))).)))..))...))))	61	2954
ENSG00000147459	DOCK5	hsa-miR-93-5p	CAAAGUGCUGUUCGUGCAGGUAG	CUAUUGCAUGAAACAGGCAUCAUG	....(((((((((((((((.(((&)))))))))).)))).))))....	74	640
ENSG00000147459	DOCK5	hsa-miR-93-5p	CAAAGUGCUGUUCGUGCAGGUAG	CUCCCUGCUGACUGCAUUUCCUG	..((((((.(((...(((((.((&)).))))).))).))))))....	75	4309
ENSG00000147459	DOCK5	hsa-miR-93-5p	CAAAGUGCUGUUCGUGCAGGUAG	CAGCCUGUACGGCAGAGACAUGG	.......((((.(((((((((..&..)))))))))))))........	70	4117
ENSG00000147459	DOCK5	hsa-miR-93-5p	CAAAGUGCUGUUCGUGCAGGUAG	UUGCCUGCCUGAUUCUCUGUG	...........(((.(((((((.&.))))))).))).........	63	2912
ENSG00000147526	TACC1	hsa-miR-93-5p	CAAAGUGCUGUUCGUGCAGGUAG	CUACUGCUAUCAGGAUUGUG	...(((.(((.....((((.(((&)))))))...))).)))...	60	163
ENSG00000147526	TACC1	hsa-miR-93-5p	CAAAGUGCUGUUCGUGCAGGUAG	UUACAUGCUGAAAGUCUUCAUG	..(((.(((.((((.(((.(((.&.))).)))))))))))))....	60	3553
ENSG00000147526	TACC1	hsa-miR-93-5p	CAAAGUGCUGUUCGUGCAGGUAG	UUACAUGCUGAAAGUCUUCAUG	..(((.(((.((((.(((.(((.&.))).)))))))))))))....	60	1300
ENSG00000147526	TACC1	hsa-miR-93-5p	CAAAGUGCUGUUCGUGCAGGUAG	UUACAUGCUGAAAGUCUUCAUG	..(((.(((.((((.(((.(((.&.))).)))))))))))))....	60	1318
ENSG00000147526	TACC1	hsa-miR-93-5p	CAAAGUGCUGUUCGUGCAGGUAG	UUACAUGCUGAAAGUCUUCAUG	..(((.(((.((((.(((.(((.&.))).)))))))))))))....	60	1318
ENSG00000147526	TACC1	hsa-miR-93-5p	CAAAGUGCUGUUCGUGCAGGUAG	CUACUGCUAUCAGGAUUGUG	...(((.(((.....((((.(((&)))))))...))).)))...	60	163
ENSG00000147526	TACC1	hsa-miR-93-5p	CAAAGUGCUGUUCGUGCAGGUAG	UUACAUGCUGAAAGUCUUCAUG	..(((.(((.((((.(((.(((.&.))).)))))))))))))....	60	3553
ENSG00000149577	SIDT2	hsa-miR-93-5p	CAAAGUGCUGUUCGUGCAGGUAG	CUGUCCUGUAUCAGGGCCCCAGUUCUCUUUG	....((.(((...((((((((((&))).)))))))))).))..............	61	890
ENSG00000149577	SIDT2	hsa-miR-93-5p	CAAAGUGCUGUUCGUGCAGGUAG	CUGUCCUGUAUCAGGGCCCCAGUUCUCUUUG	....((.(((...((((((((((&))).)))))))))).))..............	61	893
ENSG00000149577	SIDT2	hsa-miR-93-5p	CAAAGUGCUGUUCGUGCAGGUAG	CUGUCCUGUAUCAGGGCCCCAGUUCUCUUUG	....((.(((...((((((((((&))).)))))))))).))..............	61	889
ENSG00000149577	SIDT2	hsa-miR-93-5p	CAAAGUGCUGUUCGUGCAGGUAG	CUGUCCUGUAUCAGGGCCCCAGUUCUCUUUG	....((.(((...((((((((((&))).)))))))))).))..............	61	727
ENSG00000151090	THRB	hsa-miR-93-5p	CAAAGUGCUGUUCGUGCAGGUAG	UUACCUGCUUUAUCUACAGACAGAUUG	(((..((((((....(((((((.&.))))))).......)))).))..)))	71	2548
ENSG00000151090	THRB	hsa-miR-93-5p	CAAAGUGCUGUUCGUGCAGGUAG	UUAUUGGCUCGAAAUAAUAAUUUG	((((......((((.((.((((.&.)))).)).)))).......))))	65	2805
ENSG00000151090	THRB	hsa-miR-93-5p	CAAAGUGCUGUUCGUGCAGGUAG	CACCUGCGCUCCCACCCCCUCG	....(((......((((((((..&.))))))))...))).......	62	1778
ENSG00000151090	THRB	hsa-miR-93-5p	CAAAGUGCUGUUCGUGCAGGUAG	CUGCUGGUCUGGAAAUCUCGUUG	..........((((.((.(((((&))))).)).))))..........	61	2057
ENSG00000151090	THRB	hsa-miR-93-5p	CAAAGUGCUGUUCGUGCAGGUAG	UUACCUGCUUUAUCUACAGACAGAUUG	(((..((((((....(((((((.&.))))))).......)))).))..)))	71	3598
ENSG00000151090	THRB	hsa-miR-93-5p	CAAAGUGCUGUUCGUGCAGGUAG	UUAUUGGCUCGAAAUAAUAAUUUG	((((......((((.((.((((.&.)))).)).)))).......))))	65	3855
ENSG00000151090	THRB	hsa-miR-93-5p	CAAAGUGCUGUUCGUGCAGGUAG	CACCUGCGCUCCCACCCCCUCG	....(((......((((((((..&.))))))))...))).......	62	2828
ENSG00000151090	THRB	hsa-miR-93-5p	CAAAGUGCUGUUCGUGCAGGUAG	CUGCUGGUCUGGAAAUCUCGUUG	..........((((.((.(((((&))))).)).))))..........	61	3107
ENSG00000166869	CHP2	hsa-miR-93-5p	CAAAGUGCUGUUCGUGCAGGUAG	CUCCUGCAACCAGUAUCUCCUUG	....((((((....((((((...&..))))))..)))))).......	72	1323
ENSG00000171044	XKR6	hsa-miR-93-5p	CAAAGUGCUGUUCGUGCAGGUAG	CUGCCUGCCCACGAGCCCUGGUUUG	((((.((..((((((((((((((&))))))))..))))))..)).))))	83	338
ENSG00000171044	XKR6	hsa-miR-93-5p	CAAAGUGCUGUUCGUGCAGGUAG	CUGUCUGCAAAUAAGUUUG	......(((.....(((((((((&)))))))))....)))...	65	139
ENSG00000176490	DIRAS1	hsa-miR-93-5p	CAAAGUGCUGUUCGUGCAGGUAG	CUGUAUGAGCAUGACUAUAUUUUG	...(((..(((((((((((....&)))))))))))..)))........	62	1276
ENSG00000176490	DIRAS1	hsa-miR-93-5p	CAAAGUGCUGUUCGUGCAGGUAG	CAUCUGCGUGUAUACCUGUGUG	((.((.(.(((.(((((((((..&.))))))))).)))))).))..	60	1446
ENSG00000176490	DIRAS1	hsa-miR-93-5p	CAAAGUGCUGUUCGUGCAGGUAG	GUACCUGCAGCCAUGAGGUUCUG	...((.(((.....((((((((.&.)))))))).......))).)).	60	1605
ENSG00000182836	PLCXD3	hsa-miR-93-5p	CAAAGUGCUGUUCGUGCAGGUAG	CUACUGUUUCCAACAGUGAAUCCUUG	......((((((.(.((((.(((&)))))))..).)))))).........	62	411
ENSG00000182836	PLCXD3	hsa-miR-93-5p	CAAAGUGCUGUUCGUGCAGGUAG	CUACUGUUUCCAACAGUGAAUCCUUG	......((((((.(.((((.(((&)))))))..).)))))).........	62	408
ENSG00000206579	XKR4	hsa-miR-93-5p	CAAAGUGCUGUUCGUGCAGGUAG	CUGCCUCAGCAGAUUGAAAACAUUUG	(((..(((((...(.((((....&))))).)))))..)))..........	61	265
ENSG00000206579	XKR4	hsa-miR-93-5p	CAAAGUGCUGUUCGUGCAGGUAG	CUAUCUGCAUGACAUUCUGAUUG	((.((((....((((((((((((&)))))))))))))))).))....	75	532
ENSG00000206579	XKR4	hsa-miR-93-5p	CAAAGUGCUGUUCGUGCAGGUAG	CUACACUGCCAUCAGACUGUUG	...(((.(((...(.((((((((&)))).)))))..))))))....	72	14943
ENSG00000206579	XKR4	hsa-miR-93-5p	CAAAGUGCUGUUCGUGCAGGUAG	CUACCUGCUUCUUAUGGCUCACGCUAUG	....(.(((((....((((((((&)))))))).....))))).)........	61	8147
ENSG00000206579	XKR4	hsa-miR-93-5p	CAAAGUGCUGUUCGUGCAGGUAG	CUGCCUCAGCAGAUUGAAAACAUUUG	(((..(((((...(.((((....&))))).)))))..)))..........	61	16170
ENSG00000206579	XKR4	hsa-miR-93-5p	CAAAGUGCUGUUCGUGCAGGUAG	CUCCUGCAAGGGAACAUUAAUCAG	........(((((.((((((...&..))))))...)))))........	64	8273
ENSG00000206579	XKR4	hsa-miR-93-5p	CAAAGUGCUGUUCGUGCAGGUAG	CUACAGUACCAUAGUUAUUUUG	(((((((((((..((((..((((&)))).)))).)))).)))))))	61	129
ENSG00000206579	XKR4	hsa-miR-93-5p	CAAAGUGCUGUUCGUGCAGGUAG	CUACCUCAUAGGGGUGUUGUG	(((...(((.((.(((.((((((&))))))))))).))).)))..	61	3744
ENSG00000206579	XKR4	hsa-miR-93-5p	CAAAGUGCUGUUCGUGCAGGUAG	UUAGCAGCACAAUCAUAGUUUUCUG	....((((((((...........&..))))))))...............	61	11052
ENSG00000206579	XKR4	hsa-miR-93-5p	CAAAGUGCUGUUCGUGCAGGUAG	UUAUCUGCAGGCUCCUUUCUGUG	.((((.(((.....((((((((.&.)))))))))))..)))).....	61	14705
ENSG00000049246	PER3	hsa-miR-96-5p	UUUGGCACUAGCACAUUUUUGCU	AGCUAGAAUGAGCCCCAAA	(((((.....((.((((((.(((&))).)))))).)).)))))	67	2084
ENSG00000049246	PER3	hsa-miR-96-5p	UUUGGCACUAGCACAUUUUUGCU	AGCUAGAAUGAGCCCCAAA	(((((.....((.((((((.(((&))).)))))).)).)))))	67	2084
ENSG00000049246	PER3	hsa-miR-96-5p	UUUGGCACUAGCACAUUUUUGCU	AGCUAGAAUGAGCCCCAAA	(((((.....((.((((((.(((&))).)))))).)).)))))	67	2083
ENSG00000049246	PER3	hsa-miR-96-5p	UUUGGCACUAGCACAUUUUUGCU	AGCUAGAAUGAGCCCCAAA	(((((.....((.((((((.(((&))).)))))).)).)))))	67	2083
ENSG00000053254	FOXN3	hsa-miR-96-5p	UUUGGCACUAGCACAUUUUUGCU	AGUAACAAAGUUCUUGUAAGGUAAA	((((..(((((((......))))&)))..))))................	67	4899
ENSG00000053254	FOXN3	hsa-miR-96-5p	UUUGGCACUAGCACAUUUUUGCU	UGCAAAAAUCAGUGAUUUCCACA	..(((.....((..((((((((.&.))))))))..)).....)))..	65	5033
ENSG00000053254	FOXN3	hsa-miR-96-5p	UUUGGCACUAGCACAUUUUUGCU	GGUGAAAAUGUGGAGGAAAAA	.......((..((((((((((((&))))))))))))..)).....	63	568
ENSG00000065559	MAP2K4	hsa-miR-96-5p	UUUGGCACUAGCACAUUUUUGCU	AACAAAAGGGUGUAUAGUGUUCACA	...(((((((((((.((((((..&..)))))).)))).)))))))....	75	394
ENSG00000065559	MAP2K4	hsa-miR-96-5p	UUUGGCACUAGCACAUUUUUGCU	AGUGAUGAAUGUACUAUGUCUGA	...((((.(((.(((((((((((&))))).)))))).)))))))...	68	2164
ENSG00000065559	MAP2K4	hsa-miR-96-5p	UUUGGCACUAGCACAUUUUUGCU	AGGGAGAAUGGUGCUGUUUAAA	........((((((((((((.((&)).)))))).))))))......	67	828
ENSG00000065559	MAP2K4	hsa-miR-96-5p	UUUGGCACUAGCACAUUUUUGCU	AGCCGAUGUGGUAGGUGAUAAA	..(.((.(((.((((((...(((&))).)))))).))))).)....	67	1269
ENSG00000065559	MAP2K4	hsa-miR-96-5p	UUUGGCACUAGCACAUUUUUGCU	AGCAGGGAUGUUCCUUACCAAG	.((((.......(((((((((((&)))))))))))......)))).	67	1353
ENSG00000065559	MAP2K4	hsa-miR-96-5p	UUUGGCACUAGCACAUUUUUGCU	GGCAAAUAAUGGCAGUUAAAA	......(((.((.((((((((((&)))))).))))))))).....	64	828
ENSG00000065559	MAP2K4	hsa-miR-96-5p	UUUGGCACUAGCACAUUUUUGCU	GGCAAAUAAUGGCAGUUAAAA	......(((.((.((((((((((&)))))).))))))))).....	64	686
ENSG00000065559	MAP2K4	hsa-miR-96-5p	UUUGGCACUAGCACAUUUUUGCU	GGCAAAUAAUGGCAGUUAAAA	......(((.((.((((((((((&)))))).))))))))).....	64	657
ENSG00000065559	MAP2K4	hsa-miR-96-5p	UUUGGCACUAGCACAUUUUUGCU	AACAAAAGGGUGUAUAGUGUUCACA	...(((((((((((.((((((..&..)))))).)))).)))))))....	75	387
ENSG00000065559	MAP2K4	hsa-miR-96-5p	UUUGGCACUAGCACAUUUUUGCU	AGUGAUGAAUGUACUAUGUCUGA	...((((.(((.(((((((((((&))))).)))))).)))))))...	68	2157
ENSG00000065559	MAP2K4	hsa-miR-96-5p	UUUGGCACUAGCACAUUUUUGCU	AGGGAGAAUGGUGCUGUUUAAA	........((((((((((((.((&)).)))))).))))))......	67	821
ENSG00000065559	MAP2K4	hsa-miR-96-5p	UUUGGCACUAGCACAUUUUUGCU	AGCCGAUGUGGUAGGUGAUAAA	..(.((.(((.((((((...(((&))).)))))).))))).)....	67	1262
ENSG00000065559	MAP2K4	hsa-miR-96-5p	UUUGGCACUAGCACAUUUUUGCU	AGCAGGGAUGUUCCUUACCAAG	.((((.......(((((((((((&)))))))))))......)))).	67	1346
ENSG00000100307	CBX7	hsa-miR-96-5p	UUUGGCACUAGCACAUUUUUGCU	AGUGUGUGUGUGCUGGGAGAGUCAGA	((((((((..(((((((......&)))))))..)))))))).........	69	140
ENSG00000101745	ANKRD12	hsa-miR-96-5p	UUUGGCACUAGCACAUUUUUGCU	AGCAAAAAUACUGCUGCUAUUAAA	..(((((.(((...(((((((((&))))))))).))).))))).....	79	152
ENSG00000101745	ANKRD12	hsa-miR-96-5p	UUUGGCACUAGCACAUUUUUGCU	AGCGAGAAAUCUUUUAGGGAGGAA	....((....))...((((((((&)))))))).(((((....))))).	63	542
ENSG00000101745	ANKRD12	hsa-miR-96-5p	UUUGGCACUAGCACAUUUUUGCU	AGCAAAAAUACUGCUGCUAUUAAA	..(((((.(((...(((((((((&))))))))).))).))))).....	79	159
ENSG00000101745	ANKRD12	hsa-miR-96-5p	UUUGGCACUAGCACAUUUUUGCU	UGCCAGAAAGUUCAAGUGUAAAA	(((((((..((((......))))&)))))))................	71	1050
ENSG00000101745	ANKRD12	hsa-miR-96-5p	UUUGGCACUAGCACAUUUUUGCU	AGCGAGAAAUCUUUUAGGGAGGAA	....((....))...((((((((&)))))))).(((((....))))).	63	549
ENSG00000104332	SFRP1	hsa-miR-96-5p	UUUGGCACUAGCACAUUUUUGCU	AGCAAAACAUCUCUGCAGUUUUUCCCAA	.((((.(((.(((.(((((((((&))))))).))...)))))).....))))	62	1800
ENSG00000104332	SFRP1	hsa-miR-96-5p	UUUGGCACUAGCACAUUUUUGCU	AGCAUGGGAGGUGAGGAUUCCAAA	(((((......(((.((((((((&)))).)))).)))......)))))	63	561
ENSG00000104332	SFRP1	hsa-miR-96-5p	UUUGGCACUAGCACAUUUUUGCU	AGCAAAACAUCUCUGCAGUUUUUCCCAA	.((((.(((.(((.(((((((((&))))))).))...)))))).....))))	62	1806
ENSG00000104332	SFRP1	hsa-miR-96-5p	UUUGGCACUAGCACAUUUUUGCU	AGCAUGGGAGGUGAGGAUUCCAAA	(((((......(((.((((((((&)))).)))).)))......)))))	63	567
ENSG00000109943	CRTAM	hsa-miR-96-5p	UUUGGCACUAGCACAUUUUUGCU	GGUGGAGAUUGCAGUGAGUCAAG	.((((((((.(((.(((((((((&)))))))))))))))..))))).	63	551
ENSG00000109943	CRTAM	hsa-miR-96-5p	UUUGGCACUAGCACAUUUUUGCU	GGUGGAGAUUGCAGUGAGUCAAG	.((((((((.(((.(((((((((&)))))))))))))))..))))).	63	553
ENSG00000112773	FAM46A	hsa-miR-96-5p	UUUGGCACUAGCACAUUUUUGCU	AGAAAGUGUGCUCAAGGACCAAA	(((((..(((((((((((((...&.)))))))))))..))..)))))	67	3236
ENSG00000112773	FAM46A	hsa-miR-96-5p	UUUGGCACUAGCACAUUUUUGCU	AGCAAAAACAGCUGUAACAAA	((((..((.(((...((((((((&))))))))..)))))..))))	69	3258
ENSG00000112773	FAM46A	hsa-miR-96-5p	UUUGGCACUAGCACAUUUUUGCU	GGAAGAAUAUGUGUAAUCCAAA	(((((.....(((.((((((.(.&).)))))).))).....)))))	67	699
ENSG00000112773	FAM46A	hsa-miR-96-5p	UUUGGCACUAGCACAUUUUUGCU	GGCAGAAAAGGAGUUGAUGGAAAA	.....((.((((.(.((((((((&)))))))).)..)))).)).....	65	117
ENSG00000112773	FAM46A	hsa-miR-96-5p	UUUGGCACUAGCACAUUUUUGCU	AGUACAAAGUUGGAAGAUGUCAAG	.((((((((..((.(((((((((&)))).)))))))..)).)))))).	65	306
ENSG00000112773	FAM46A	hsa-miR-96-5p	UUUGGCACUAGCACAUUUUUGCU	AGAAAGUGUGCUCAAGGACCAAA	(((((..(((((((((((((...&.)))))))))))..))..)))))	67	3236
ENSG00000112773	FAM46A	hsa-miR-96-5p	UUUGGCACUAGCACAUUUUUGCU	AGCAAAAACAGCUGUAACAAA	((((..((.(((...((((((((&))))))))..)))))..))))	69	3258
ENSG00000112773	FAM46A	hsa-miR-96-5p	UUUGGCACUAGCACAUUUUUGCU	GGAAGAAUAUGUGUAAUCCAAA	(((((.....(((.((((((.(.&).)))))).))).....)))))	67	699
ENSG00000112773	FAM46A	hsa-miR-96-5p	UUUGGCACUAGCACAUUUUUGCU	GGCAGAAAAGGAGUUGAUGGAAAA	.....((.((((.(.((((((((&)))))))).)..)))).)).....	65	117
ENSG00000112773	FAM46A	hsa-miR-96-5p	UUUGGCACUAGCACAUUUUUGCU	AGUACAAAGUUGGAAGAUGUCAAG	.((((((((..((.(((((((((&)))).)))))))..)).)))))).	65	306
ENSG00000112773	FAM46A	hsa-miR-96-5p	UUUGGCACUAGCACAUUUUUGCU	AGAAAGUGUGCUCAAGGACCAAA	(((((..(((((((((((((...&.)))))))))))..))..)))))	67	3236
ENSG00000112773	FAM46A	hsa-miR-96-5p	UUUGGCACUAGCACAUUUUUGCU	AGCAAAAACAGCUGUAACAAA	((((..((.(((...((((((((&))))))))..)))))..))))	69	3258
ENSG00000112773	FAM46A	hsa-miR-96-5p	UUUGGCACUAGCACAUUUUUGCU	GGAAGAAUAUGUGUAAUCCAAA	(((((.....(((.((((((.(.&).)))))).))).....)))))	67	699
ENSG00000112773	FAM46A	hsa-miR-96-5p	UUUGGCACUAGCACAUUUUUGCU	GGCAGAAAAGGAGUUGAUGGAAAA	.....((.((((.(.((((((((&)))))))).)..)))).)).....	65	117
ENSG00000112773	FAM46A	hsa-miR-96-5p	UUUGGCACUAGCACAUUUUUGCU	AGUACAAAGUUGGAAGAUGUCAAG	.((((((((..((.(((((((((&)))).)))))))..)).)))))).	65	306
ENSG00000118432	CNR1	hsa-miR-96-5p	UUUGGCACUAGCACAUUUUUGCU	UGCACAAGUAGGGCUGCCUCCAAG	.((((...((((.(((((.(((.&.))).)))).).))))...)))).	61	1048
ENSG00000118432	CNR1	hsa-miR-96-5p	UUUGGCACUAGCACAUUUUUGCU	AGCAAUAUGUCAGUCACUAAA	(((((.(((.(.((((..(((((&))))).))))))))..)))))	60	2538
ENSG00000118432	CNR1	hsa-miR-96-5p	UUUGGCACUAGCACAUUUUUGCU	UGCACAAGUAGGGCUGCCUCCAAG	.((((...((((.(((((.(((.&.))).)))).).))))...)))).	61	1036
ENSG00000118432	CNR1	hsa-miR-96-5p	UUUGGCACUAGCACAUUUUUGCU	AGCAAUAUGUCAGUCACUAAA	(((((.(((.(.((((..(((((&))))).))))))))..)))))	60	2526
ENSG00000118922	KLF12	hsa-miR-96-5p	UUUGGCACUAGCACAUUUUUGCU	AGCAACAGUGUAAUGAUUUUCAGGUCAAA	....((....))(((((.(((((&))))).)))))..(((((....)))))..	66	7389
ENSG00000122707	RECK	hsa-miR-96-5p	UUUGGCACUAGCACAUUUUUGCU	AGUAUUAAAAUGUAUGCAUGUUGUCUAA	...(((((..(((((((((((((&))))..)))))))..))..).))))...	71	305
ENSG00000132561	MATN2	hsa-miR-96-5p	UUUGGCACUAGCACAUUUUUGCU	AGCAAAAAUGAGUAUAUUUUUUAA	....((....)).((((((((((&))))))))))..............	71	327
ENSG00000132561	MATN2	hsa-miR-96-5p	UUUGGCACUAGCACAUUUUUGCU	ACAGGAAUGUGCUACAUCUAUA	..(((...(((((((((((((..&.)))))))))))))...)))..	68	19
ENSG00000132561	MATN2	hsa-miR-96-5p	UUUGGCACUAGCACAUUUUUGCU	GGUAAGGAUGUGGAAAUGUGAGG	.((.(((....((((((((((((&))))))))))))....))).)).	63	296
ENSG00000136011	STAB2	hsa-miR-96-5p	UUUGGCACUAGCACAUUUUUGCU	AGCAAGAAAUCUUGUCAGA	(((((((..((....((((((((&))))))))..)))))))))	62	174
ENSG00000138639	ARHGAP24	hsa-miR-96-5p	UUUGGCACUAGCACAUUUUUGCU	CGCAAAGAAUCUCCUGGUAGAGAAG	....((....))...(((((((.&.))))))).((((......))))..	61	496
ENSG00000138639	ARHGAP24	hsa-miR-96-5p	UUUGGCACUAGCACAUUUUUGCU	AGUAAGAUUUGUUGCUCUCAGA	.........((((((.(((((((&)))))))..)).))))......	60	88
ENSG00000138735	PDE5A	hsa-miR-96-5p	UUUGGCACUAGCACAUUUUUGCU	AGCAAGAAGUUCUUGUUCUAGA	(((((.((.((.((.((((((((&)))))))))).)).)).)))))	78	1813
ENSG00000138735	PDE5A	hsa-miR-96-5p	UUUGGCACUAGCACAUUUUUGCU	AGAAAAAUGUUCUGUUAGAAG	.......(((((((((((((...&..))))))))...)))))...	61	3383
ENSG00000138735	PDE5A	hsa-miR-96-5p	UUUGGCACUAGCACAUUUUUGCU	UGUUAAAUUGUGCAUGGUUUUGGA	......(((((((((.(((.((.&.)).))).))))).))))......	61	534
ENSG00000138735	PDE5A	hsa-miR-96-5p	UUUGGCACUAGCACAUUUUUGCU	AGCAAGAAGUUCUUGUUCUAGA	(((((.((.((.((.((((((((&)))))))))).)).)).)))))	78	1815
ENSG00000138735	PDE5A	hsa-miR-96-5p	UUUGGCACUAGCACAUUUUUGCU	AGAAAAAUGUUCUGUUAGAAG	.......(((((((((((((...&..))))))))...)))))...	61	3385
ENSG00000138735	PDE5A	hsa-miR-96-5p	UUUGGCACUAGCACAUUUUUGCU	UGUUAAAUUGUGCAUGGUUUUGGA	......(((((((((.(((.((.&.)).))).))))).))))......	61	536
ENSG00000145012	LPP	hsa-miR-96-5p	UUUGGCACUAGCACAUUUUUGCU	GGCGAAAGAGCGAGACUCCGUCUCAAA	....((....)).(.((((((((&)))))))).).(((((...)))))...	61	9529
ENSG00000145012	LPP	hsa-miR-96-5p	UUUGGCACUAGCACAUUUUUGCU	GGCGAAAGAGCGAGACUCCGUCUCAAA	....((....)).(.((((((((&)))))))).).(((((...)))))...	61	9529
ENSG00000145012	LPP	hsa-miR-96-5p	UUUGGCACUAGCACAUUUUUGCU	GGCGAAAGAGCGAGACUCCGUCUCAAA	....((....)).(.((((((((&)))))))).).(((((...)))))...	61	9529
ENSG00000145012	LPP	hsa-miR-96-5p	UUUGGCACUAGCACAUUUUUGCU	GGCAGAAAGUGACAAGUGACUUAA	...((((((.((((.((((((((&))))))))))).).)))).))...	74	1053
ENSG00000145349	CAMK2D	hsa-miR-96-5p	UUUGGCACUAGCACAUUUUUGCU	ACAAAAAUGUUGUCAAGAUUUUAAA	(((((((.....(((((((((..&.))))))))))))))))........	64	2513
ENSG00000145349	CAMK2D	hsa-miR-96-5p	UUUGGCACUAGCACAUUUUUGCU	AGUUAGAAUUUCCCAGUUUAAAA	((((((...((((......))))&.))))))................	61	2133
ENSG00000145349	CAMK2D	hsa-miR-96-5p	UUUGGCACUAGCACAUUUUUGCU	ACAAAAAUGUUGUCAAGAUUUUAAA	(((((((.....(((((((((..&.))))))))))))))))........	64	584
ENSG00000145349	CAMK2D	hsa-miR-96-5p	UUUGGCACUAGCACAUUUUUGCU	AGUUAGAAUUUCCCAGUUUAAAA	((((((...((((......))))&.))))))................	61	204
ENSG00000145349	CAMK2D	hsa-miR-96-5p	UUUGGCACUAGCACAUUUUUGCU	ACAAAAAUGUUGUCAAGAUUUUAAA	(((((((.....(((((((((..&.))))))))))))))))........	64	2513
ENSG00000145349	CAMK2D	hsa-miR-96-5p	UUUGGCACUAGCACAUUUUUGCU	AGUUAGAAUUUCCCAGUUUAAAA	((((((...((((......))))&.))))))................	61	2133
ENSG00000147459	DOCK5	hsa-miR-96-5p	UUUGGCACUAGCACAUUUUUGCU	GGCGGAGGUUUGCAGUAUGCUGAG	.((((((((.(((.(((((((((&))))))))).))))))..))))).	66	809
ENSG00000147459	DOCK5	hsa-miR-96-5p	UUUGGCACUAGCACAUUUUUGCU	AGUAGAAAUGAGUCCCACA	..(((.(((....((((((((((&))))))))))))).)))..	67	2059
ENSG00000147526	TACC1	hsa-miR-96-5p	UUUGGCACUAGCACAUUUUUGCU	AGCAAUGAAUUGUGCCUAGUGGAGAA	.....((((((((((((((((((&))))).))).)))).)))))).....	81	3455
ENSG00000147526	TACC1	hsa-miR-96-5p	UUUGGCACUAGCACAUUUUUGCU	AGUAAAGAUGUAUUUAUUCUGAA	....((....))(((((((((((&)))))))))))............	69	1241
ENSG00000147526	TACC1	hsa-miR-96-5p	UUUGGCACUAGCACAUUUUUGCU	AGCAAGAUCUUGUCUCAAA	..........(((...(((((((&)))))))...)))......	61	2250
ENSG00000147526	TACC1	hsa-miR-96-5p	UUUGGCACUAGCACAUUUUUGCU	AGCAAUGAAUUGUGCCUAGUGGAGAA	.....((((((((((((((((((&))))).))).)))).)))))).....	81	1202
ENSG00000147526	TACC1	hsa-miR-96-5p	UUUGGCACUAGCACAUUUUUGCU	AGCAAUGAAUUGUGCCUAGUGGAGAA	.....((((((((((((((((((&))))).))).)))).)))))).....	81	1220
ENSG00000147526	TACC1	hsa-miR-96-5p	UUUGGCACUAGCACAUUUUUGCU	AGCAAGAUCUUGUCUCAAA	..........(((...(((((((&)))))))...)))......	61	15
ENSG00000147526	TACC1	hsa-miR-96-5p	UUUGGCACUAGCACAUUUUUGCU	AGCAAUGAAUUGUGCCUAGUGGAGAA	.....((((((((((((((((((&))))).))).)))).)))))).....	81	1220
ENSG00000147526	TACC1	hsa-miR-96-5p	UUUGGCACUAGCACAUUUUUGCU	AGCAAGAUCUUGUCUCAAA	..........(((...(((((((&)))))))...)))......	61	15
ENSG00000147526	TACC1	hsa-miR-96-5p	UUUGGCACUAGCACAUUUUUGCU	AGCAAUGAAUUGUGCCUAGUGGAGAA	.....((((((((((((((((((&))))).))).)))).)))))).....	81	3455
ENSG00000147526	TACC1	hsa-miR-96-5p	UUUGGCACUAGCACAUUUUUGCU	AGUAAAGAUGUAUUUAUUCUGAA	....((....))(((((((((((&)))))))))))............	69	1241
ENSG00000147526	TACC1	hsa-miR-96-5p	UUUGGCACUAGCACAUUUUUGCU	AGCAAGAUCUUGUCUCAAA	..........(((...(((((((&)))))))...)))......	61	2250
ENSG00000151090	THRB	hsa-miR-96-5p	UUUGGCACUAGCACAUUUUUGCU	UGCGAAAAGUGUGCAUUUAUAGUGUGUUUCCACA	....((((((((((((((((((.&.)).)))))))))).....)))))).........	61	662
ENSG00000151090	THRB	hsa-miR-96-5p	UUUGGCACUAGCACAUUUUUGCU	UGCGAAAAGUGUGCAUUUAUAGUGUGUUUCCACA	....((((((((((((((((((.&.)).)))))))))).....)))))).........	61	1712
ENSG00000165338	HECTD2	hsa-miR-96-5p	UUUGGCACUAGCACAUUUUUGCU	AGCAGAAUUCUUCCAGGGUGGAG	.....((((.......(((((((&))))))).........))))...	61	1000
ENSG00000165338	HECTD2	hsa-miR-96-5p	UUUGGCACUAGCACAUUUUUGCU	AGCAGAAUUCUUCCAGGGUGGAG	.....((((.......(((((((&))))))).........))))...	61	997
ENSG00000165338	HECTD2	hsa-miR-96-5p	UUUGGCACUAGCACAUUUUUGCU	AGCAGAAUUCUUCCAGGGUGGAG	.....((((.......(((((((&))))))).........))))...	61	932
ENSG00000170647	TMEM133	hsa-miR-96-5p	UUUGGCACUAGCACAUUUUUGCU	AUUAAAAAUGUGCAUUUUAUAUAAA	..........(((((((((((..&..)))))))))))............	61	667
ENSG00000171044	XKR6	hsa-miR-96-5p	UUUGGCACUAGCACAUUUUUGCU	UGUAAGAAGGCUGGUGCUCCUGAA	...(((((((((.(.(((((((.&.)))))))))))))))))......	63	395
ENSG00000172915	NBEA	hsa-miR-96-5p	UUUGGCACUAGCACAUUUUUGCU	AGCAGAAAGGGGGCUUAGGGAUGAG	.......(((((...((((((((&))))))))....)).))).......	65	912
ENSG00000172915	NBEA	hsa-miR-96-5p	UUUGGCACUAGCACAUUUUUGCU	GCCAGAUGUGUGUGAGUUGGAAAUCAAA	((((((.(..((((((((..((.&)).))))))))..).)))))).......	61	29
ENSG00000172915	NBEA	hsa-miR-96-5p	UUUGGCACUAGCACAUUUUUGCU	AGCAGAAAGGGGGCUUAGGGAUGAG	.......(((((...((((((((&))))))))....)).))).......	65	913
ENSG00000172915	NBEA	hsa-miR-96-5p	UUUGGCACUAGCACAUUUUUGCU	GCCAGAUGUGUGUGAGUUGGAAAUCAAA	((((((.(..((((((((..((.&)).))))))))..).)))))).......	61	30
ENSG00000172915	NBEA	hsa-miR-96-5p	UUUGGCACUAGCACAUUUUUGCU	AGCAGAAAGGGGGCUUAGGGAUGAG	.......(((((...((((((((&))))))))....)).))).......	65	912
ENSG00000172915	NBEA	hsa-miR-96-5p	UUUGGCACUAGCACAUUUUUGCU	GCCAGAUGUGUGUGAGUUGGAAAUCAAA	((((((.(..((((((((..((.&)).))))))))..).)))))).......	61	29
ENSG00000172915	NBEA	hsa-miR-96-5p	UUUGGCACUAGCACAUUUUUGCU	AGCAGAAAGGGGGCUUAGGGAUGAG	.......(((((...((((((((&))))))))....)).))).......	65	912
ENSG00000172915	NBEA	hsa-miR-96-5p	UUUGGCACUAGCACAUUUUUGCU	GCCAGAUGUGUGUGAGUUGGAAAUCAAA	((((((.(..((((((((..((.&)).))))))))..).)))))).......	61	29
ENSG00000172915	NBEA	hsa-miR-96-5p	UUUGGCACUAGCACAUUUUUGCU	AGCAGAAAGGGGGCUUAGGGAUGAG	.......(((((...((((((((&))))))))....)).))).......	65	912
ENSG00000172915	NBEA	hsa-miR-96-5p	UUUGGCACUAGCACAUUUUUGCU	GCCAGAUGUGUGUGAGUUGGAAAUCAAA	((((((.(..((((((((..((.&)).))))))))..).)))))).......	61	29
ENSG00000176490	DIRAS1	hsa-miR-96-5p	UUUGGCACUAGCACAUUUUUGCU	AGCAAUGUGACUUUCGGUUCCAAA	(((((.((((((((((...((((&))))))))).))...))).)))))	72	1151
ENSG00000176490	DIRAS1	hsa-miR-96-5p	UUUGGCACUAGCACAUUUUUGCU	GGUAACAGAUUGCUCGUGUCUGA	...(((((.((((.(((((((((&))))).)))))))).)))))...	70	620
ENSG00000182836	PLCXD3	hsa-miR-96-5p	UUUGGCACUAGCACAUUUUUGCU	AGUAAAAAAUGGUGAUAUGCAAUCGAA	....(((.((.(((.((((((((&))))))))...))).))))).......	70	3622
ENSG00000182836	PLCXD3	hsa-miR-96-5p	UUUGGCACUAGCACAUUUUUGCU	AGCAAAAUCUACUUCUAGUGUUAGG	.((((((((((.....(((((((&))))))).......)))))))))).	69	6433
ENSG00000182836	PLCXD3	hsa-miR-96-5p	UUUGGCACUAGCACAUUUUUGCU	UGUAAAAGAAUUCUAGUGUAGGA	....(((((((....(((((((.&.)))))))....)))))))....	63	4408
ENSG00000182836	PLCXD3	hsa-miR-96-5p	UUUGGCACUAGCACAUUUUUGCU	GGUACAAGUGUGUUAAAAUUGAA	........((((((((((.((((&)))).))))))))))........	61	5845
ENSG00000182836	PLCXD3	hsa-miR-96-5p	UUUGGCACUAGCACAUUUUUGCU	AGCCAAGAAUAUUUGCAAUGACACA	((((((...((((......))))&.))))))..................	60	4167
ENSG00000182836	PLCXD3	hsa-miR-96-5p	UUUGGCACUAGCACAUUUUUGCU	AGUAAAAAAUGGUGAUAUGCAAUCGAA	....(((.((.(((.((((((((&))))))))...))).))))).......	70	3619
ENSG00000182836	PLCXD3	hsa-miR-96-5p	UUUGGCACUAGCACAUUUUUGCU	AGCAAAAUCUACUUCUAGUGUUAGG	.((((((((((.....(((((((&))))))).......)))))))))).	69	6240
ENSG00000182836	PLCXD3	hsa-miR-96-5p	UUUGGCACUAGCACAUUUUUGCU	UGUAAAAGAAUUCUAGUGUAGGA	....(((((((....(((((((.&.)))))))....)))))))....	63	4405
ENSG00000182836	PLCXD3	hsa-miR-96-5p	UUUGGCACUAGCACAUUUUUGCU	GGUACAAGUGUGUUAAAAUUGAA	........((((((((((.((((&)))).))))))))))........	61	5652
ENSG00000182836	PLCXD3	hsa-miR-96-5p	UUUGGCACUAGCACAUUUUUGCU	AGCCAAGAAUAUUUGCAAUGACACA	((((((...((((......))))&.))))))..................	60	4164
ENSG00000198846	TOX	hsa-miR-96-5p	UUUGGCACUAGCACAUUUUUGCU	CGCAAAAAAGUAAAAGUCAAACCAAA	((((((......((.(((((((.&.))))))).))....)))))).....	67	980
ENSG00000198961	PJA2	hsa-miR-96-5p	UUUGGCACUAGCACAUUUUUGCU	AGUUGAAAUGAGAUCAGUGUAUCAAA	....(((((....((((((.(((&))).)))))).....)))))......	73	2484
ENSG00000198961	PJA2	hsa-miR-96-5p	UUUGGCACUAGCACAUUUUUGCU	UGUUAAAAUGGAAUGCAAGUUUUUCAAA	(((((.(((.(((((((((.((.&.)).))))))...))).)))...)))))	65	106
ENSG00000198961	PJA2	hsa-miR-96-5p	UUUGGCACUAGCACAUUUUUGCU	AGUUGAAAUGAGAUCAGUGUAUCAAA	....(((((....((((((.(((&))).)))))).....)))))......	73	2488
ENSG00000198961	PJA2	hsa-miR-96-5p	UUUGGCACUAGCACAUUUUUGCU	UGUUAAAAUGGAAUGCAAGUUUUUCAAA	(((((.(((.(((((((((.((.&.)).))))))...))).)))...)))))	65	110
ENSG00000206579	XKR4	hsa-miR-96-5p	UUUGGCACUAGCACAUUUUUGCU	UGCAAAAAUGUAACAGGUACACAAA	(((((.(((...((((((((((.&.))))))))))....))).).))))	77	1095
ENSG00000206579	XKR4	hsa-miR-96-5p	UUUGGCACUAGCACAUUUUUGCU	AGCAAAAGGAGUUGCAGGACCCACA	...((..((.((((.((((((((&))))))))..).)))))..))....	67	1897
ENSG00000206579	XKR4	hsa-miR-96-5p	UUUGGCACUAGCACAUUUUUGCU	GGCAAAAUGAGAGUCUGAUUCCCAG	.((((.(((..((...(((((((&)))))))))..))))))).......	60	1053
ENSG00000206579	XKR4	hsa-miR-96-5p	UUUGGCACUAGCACAUUUUUGCU	UGCAAAAAUGUAACAGGUACACAAA	(((((.(((...((((((((((.&.))))))))))....))).).))))	77	17000
ENSG00000206579	XKR4	hsa-miR-96-5p	UUUGGCACUAGCACAUUUUUGCU	UGCAGAAAUGGUGUGAGCCUGAGUUACAAA	...(((.(..((.(((((((((.&.)))))))))))..).)))...........	63	1185
ENSG00000206579	XKR4	hsa-miR-96-5p	UUUGGCACUAGCACAUUUUUGCU	AGCAAAAGGAGUUGCAGGACCCACA	...((..((.((((.((((((((&))))))))..).)))))..))....	67	17802
ENSG00000206579	XKR4	hsa-miR-96-5p	UUUGGCACUAGCACAUUUUUGCU	AGCAAAAAUCUUGUUUAACGAA	((((.....((((.(((((((((&)))))))))..))))...))))	64	9672
ENSG00000206579	XKR4	hsa-miR-96-5p	UUUGGCACUAGCACAUUUUUGCU	GGCAGCAGUGAGCUGUCACUCAGA	..(((((...((.((((.(((((&))))).)))).)))))))......	62	8468
ENSG00000206579	XKR4	hsa-miR-96-5p	UUUGGCACUAGCACAUUUUUGCU	AAAAAAUGUGCACACUCUUAAA	..........((((((((((...&.))))))))))...........	61	2700
ENSG00000206579	XKR4	hsa-miR-96-5p	UUUGGCACUAGCACAUUUUUGCU	AGGAAAAAUGAGAAGAGGAAGA	....((....)).(((((((.((&)).)))))))............	60	7058
ENSG00000206579	XKR4	hsa-miR-96-5p	UUUGGCACUAGCACAUUUUUGCU	AGCAAAAGAUAAUCUGAGGAUAAA	....((....))...((((((((&))))))))................	60	14255
ENSG00000206579	XKR4	hsa-miR-96-5p	UUUGGCACUAGCACAUUUUUGCU	GGCAAAAUGAGAGUCUGAUUCCCAG	.((((.(((..((...(((((((&)))))))))..))))))).......	60	16958
