# Supplementary material for: Naïve Bayes classifier predicts functional microRNA target interactions in colorectal cancer
Source: Royal Society of Chemistry journal article supplement (doi:10.1039/c5mb00245a), 2015-06-11
Supplement: c5mb00245a5.xlsx [file c5mb00245a5.xlsx]

## Sheet: Features
Rank	Features	Description	ReliefF Score
1	seed	Number of base pairings to the microRNA 8-mer seed (presence of wobble is allowed)	0.143686
2	cons_bp_mir_5p_with_2np	Number of consecutive base-pairings to the microRNA 5ʹ end with two allowed non-pairing positions	0.138023
3	tail	Number of base parings to the first 8 nucleotides of the microRNA 3’ end	0.133883
4	pos_3	Position 3	0.106768
5	pos_2	Position 2	0.104992
6	pos_6	Position 6	0.0972927
7	CG_match	Frequency of CG base pair in seed region	0.0971447
8	GC_match	Frequency of GC base pair in seed region	0.0960025
9	AU_match	Frequency of AU base pair in seed region	0.0907995
10	pos_4	Position 4	0.0868866
11	pos_7	Position 7	0.0835871
12	pos_5	Position 5	0.0823181
13	UA_match	Frequency of UA base pair in seed region	0.0519459
14	GC_seed	GC’s frequency in seed matching site	0.0465736
15	AC_seed	AC’s frequency in seed matching site	0.0426396
16	pos_1	Position 1	0.0345178
17	GC_outseed	GC’s frequency in seed matching out site	0.0332995
18	G+C_target	G+C content of the target site	0.0329442
19	UC_seed	UC’s frequency in seed matching site	0.0324027
20	G_outseed	G’s frequency in seed matching out site	0.0322547
21	UA-AU	Frequency of UA-AU in seed region (Bi-Di-nucleotide base pairing)	0.0307107
22	GU_seed	GU’s frequency in seed matching site	0.027242
23	pos_8	Position 8	0.0269036
24	GC_target	GC’s frequency in target site	0.0263425
25	CGGC	Frequency of CG-GC in seed region (Bi-Di-nucleotide base pairing)	0.0256345
26	GC_ratio	G+C content ratio between the microRNA and the target site	0.0215275
27	AU_seed	AU’s frequency in seed matching site	0.0211929
28	GG_outseed	GG’s frequency in seed matching out site	0.0205901
29	AG_outseed	AG’s frequency in seed matching out site	0.0203046
30	GU_match	Frequency of GU base pair in seed region	0.02022
31	CG_seed	CG’s frequency in seed matching site	0.0201777
32	Stem	Longest stretch of consecutive base-pairings in the hybrid	0.0192296
33	Compactness	For detail see PMID: 20509939	0.0192153
34	CC_seed	CC’s frequency in seed matching site	0.0186125
35	UA_seed	UA’s frequency in seed matching site	0.0180203
36	GA_outseed	GA’s frequency in seed matching out site	0.0178299
37	GC-CG	Frequency of GC-CG in seed region (Bi-Di-nucleotide base pairing)	0.0173858
38	B_tagt_s2	Bulges in target sequences of size 2nt	0.0162437
39	Binding asymmetry	The ratio between the amounts of paired bases in the 3p versus the 5p region of the microRNA (considering 8 nucleotides on each side)	0.0129806
40	MFE	Minimum free energy calculated using RNAcofold as a part of Vienna package	0.0116685
41	log2intensitive_mRNA		0.0108204
42	GU-UA	Frequency of GU-UA in seed region (Bi-Di-nucleotide base pairing)	0.0107868
43	WC_bp_po_12-17	Number of Watson-Crick pairing in position 12-17	0.0103215
44	UU_seed	UU’s frequency in seed matching site	0.0096024
45	B_miR_s1	Bulges in miRNA sequences of size 1nt	0.0068528
46	B_miR_s5	Bulges in miRNA sequences of size 5nt	0.0060914
47	Max_bp	Total number of base pairings	0.0048505
48	UA-UG	Frequency of UA-UG in seed region (Bi-Di-nucleotide base pairing)	0.0040609
49	UC_outseed	UC’s frequency in seed matching out site	0.0037437
50	B_tagt_s4	Bulges in target sequences of size 4nt	0.0032995
51	AU_outseed	AU’s frequency in seed matching out site	0.0032995
52	UU_outseed	UU’s frequency in seed matching out site	0.0025381
53	AC_outseed	AC’s frequency in seed matching out site	0.0024112
54	B_tagt_s1	Bulges in target sequences of size 1nt	0.0011844
55	B_miR_s2	Bulges in miRNA sequences of size 2nt	0.0006345
56	GU-CG	Frequency of GU-CG in seed region (Bi-Di-nucleotide base pairing)	0.0002538
57	log2intensitive_miRNA		9.6e-05
58	UA-CG	Frequency of UA-CG in seed region (Bi-Di-nucleotide base pairing)	0
59	GU-AU	Frequency of GU-AU in seed region (Bi-Di-nucleotide base pairing)	0
60	AU-CG	Frequency of AU-CG in seed region (Bi-Di-nucleotide base pairing)	0
61	AU-AU	Frequency of AU-AU in seed region (Bi-Di-nucleotide base pairing)	0
62	CG-UA	Frequency of CG-UA in seed region (Bi-Di-nucleotide base pairing)	0
63	GC-GC	Frequency of GC-GC in seed region (Bi-Di-nucleotide base pairing)	0
64	UA-GC	Frequency of UA-GC in seed region (Bi-Di-nucleotide base pairing)	-0.0005076
65	B_tagt_s7	Bulges in target sequences of size 7nt	-0.0010152
66	UA-GU	Frequency of UA-GU in seed region (Bi-Di-nucleotide base pairing)	-0.0020305
67	B_tagt_s6	Bulges in target sequences of size 6nt	-0.0027919
68	B_tagt_s5	Bulges in target sequences of size 5nt	-0.0032995
69	AU-UG	Frequency of AU-UG in seed region (Bi-Di-nucleotide base pairing)	-0.0071066
70	B_tagt_s3	Bulges in target sequences of size 3nt	-0.0086294
71	B_miR_s3	Bulges in miRNA sequences of size 3nt	-0.0104061
72	B_miR_s4	Bulges in miRNA sequences of size 4nt	-0.0111675
