# Supplementary material for: Naïve Bayes classifier predicts functional microRNA target interactions in colorectal cancer
Source: Royal Society of Chemistry journal article supplement (doi:10.1039/c5mb00245a), 2015-06-11
Supplement: c5mb00245a6.xlsx [file c5mb00245a6.xlsx]

## Sheet: SelectedFeatures_Lung_Breast
Features selected based on CFS selection method to discriminate for different cancer entities.
CRC	Lung cancer	Breast cancer
UU_seed	GC_seed	WC_bp_po_12-17
CG_seed	AC_outseed	G
AU_pair	GC_outseed	GC_outseed
UA_pair	AU_pair	GU_pair
GC_pair	UA_pair	CG_pair
CG_pair	Seed	Tail
Seed	GC_target	cons_bp_mir_3p_with_2np
GC_target	log2_intensity_mRNA	Binding asymmetry
Tail		pos_1
Cons_bp_mir_5p		pos_2
Binding asymmetry		pos_7
B_tagt_s6		log2_intensity_mRNA
Pos_3
Pos_7
