# Supplementary material for: Naïve Bayes classifier predicts functional microRNA target interactions in colorectal cancer
Source: Royal Society of Chemistry journal article supplement (doi:10.1039/c5mb00245a), 2015-06-11
Supplement: c5mb00245a7.xlsx [file c5mb00245a7.xlsx]

## Sheet: GO_analysis
Category	Term	Count	PValue	Genes	List Total	Fold Enrichment	FDR
GOTERM_BP_FAT	GO:0045934~negative regulation of nucleobase, nucleoside, nucleotide and nucleic acid metabolic process	6	0.004954629561225138	PALM, KLF12, THRB, ZFPM2, FOXN3, KLF4	31	5.11391129032258	6.952012953091624
GOTERM_BP_FAT	GO:0051172~negative regulation of nitrogen compound metabolic process	6	0.0052467923412869025	PALM, KLF12, THRB, ZFPM2, FOXN3, KLF4	31	5.044937534961775	7.347563370148736
GOTERM_BP_FAT	GO:0031327~negative regulation of cellular biosynthetic process	6	0.0072640800719617465	PALM, KLF12, THRB, ZFPM2, FOXN3, KLF4	31	4.667241676729343	10.036279077752008
GOTERM_BP_FAT	GO:0009890~negative regulation of biosynthetic process	6	0.00792883676530015	PALM, KLF12, THRB, ZFPM2, FOXN3, KLF4	31	4.569498395541294	10.906255101791151
GOTERM_BP_FAT	GO:0045944~positive regulation of transcription from RNA polymerase II promoter	5	0.008680069943626297	FOS, KLF12, THRB, ZFPM2, KLF4	31	5.881227719328754	11.879973450372228
GOTERM_BP_FAT	GO:0001568~blood vessel development	4	0.016613858603704876	RECK, ZFPM2, STAB2, ARHGAP24	31	7.124687294272547	21.575962223944856
GOTERM_BP_FAT	GO:0001944~vasculature development	4	0.017711802399865206	RECK, ZFPM2, STAB2, ARHGAP24	31	6.954376044210255	22.836649316044277
GOTERM_BP_FAT	GO:0016481~negative regulation of transcription	5	0.017825934897099625	KLF12, THRB, ZFPM2, FOXN3, KLF4	31	4.753672078150257	22.966610767325825
GOTERM_BP_FAT	GO:0045893~positive regulation of transcription, DNA-dependent	5	0.02023579347550161	FOS, KLF12, THRB, ZFPM2, KLF4	31	4.574288226144586	25.663565236836572
GOTERM_BP_FAT	GO:0051254~positive regulation of RNA metabolic process	5	0.020797601530770187	FOS, KLF12, THRB, ZFPM2, KLF4	31	4.536248407216149	26.279537156074117
GOTERM_BP_FAT	GO:0010605~negative regulation of macromolecule metabolic process	6	0.021378203312745616	KLF12, THRB, SNCA, ZFPM2, FOXN3, KLF4	31	3.5671969763558056	26.91111885664752
GOTERM_BP_FAT	GO:0010629~negative regulation of gene expression	5	0.02421677040689128	KLF12, THRB, ZFPM2, FOXN3, KLF4	31	4.329237071172555	29.92705201056358
GOTERM_BP_FAT	GO:0010558~negative regulation of macromolecule biosynthetic process	5	0.03149142491573714	KLF12, THRB, ZFPM2, FOXN3, KLF4	31	3.9889131332193197	37.13559683575771
GOTERM_BP_FAT	GO:0045941~positive regulation of transcription	5	0.034691316111880935	FOS, KLF12, THRB, ZFPM2, KLF4	31	3.8686799359414317	40.08236151208068
GOTERM_BP_FAT	GO:0016055~Wnt receptor signaling pathway	3	0.034876205223932956	SFRP1, SFRP2, RNF138	31	9.84331797235023	40.24863077302568
GOTERM_BP_FAT	GO:0010628~positive regulation of gene expression	5	0.03807733785381191	FOS, KLF12, THRB, ZFPM2, KLF4	31	3.7554827605352283	43.060142281930666
GOTERM_BP_FAT	GO:0010604~positive regulation of macromolecule metabolic process	6	0.0383936757183231	FOS, KLF12, THRB, SNCA, ZFPM2, KLF4	31	3.0552188805661156	43.33118450131991
GOTERM_BP_FAT	GO:0045892~negative regulation of transcription, DNA-dependent	4	0.04343327103892954	KLF12, ZFPM2, FOXN3, KLF4	31	4.903225806451613	47.49038018462871
GOTERM_BP_FAT	GO:0051253~negative regulation of RNA metabolic process	4	0.045271610047614916	KLF12, ZFPM2, FOXN3, KLF4	31	4.821956870433078	48.93547056961333
GOTERM_BP_FAT	GO:0045935~positive regulation of nucleobase, nucleoside, nucleotide and nucleic acid metabolic process	5	0.04747951030785203	FOS, KLF12, THRB, ZFPM2, KLF4	31	3.4966914805624483	50.62211076805584
GOTERM_BP_FAT	GO:0051173~positive regulation of nitrogen compound metabolic process	5	0.05226309081572418	FOS, KLF12, THRB, ZFPM2, KLF4	31	3.388098577439391	54.09999062917548
GOTERM_BP_FAT	GO:0010557~positive regulation of macromolecule biosynthetic process	5	0.054752548819131844	FOS, KLF12, THRB, ZFPM2, KLF4	31	3.3362927887935285	55.81835605305023
GOTERM_BP_FAT	GO:0031328~positive regulation of cellular biosynthetic process	5	0.06288193632594219	FOS, KLF12, THRB, ZFPM2, KLF4	31	3.1853072757240404	61.0216362425815
GOTERM_BP_FAT	GO:0009891~positive regulation of biosynthetic process	5	0.06563651956886563	FOS, KLF12, THRB, ZFPM2, KLF4	31	3.1394755163611046	62.651149571868025
GOTERM_BP_FAT	GO:0009617~response to bacterium	3	0.06787268249478717	FOS, SNCA, STAB2	31	6.783219120842387	63.92709664389844
GOTERM_BP_FAT	GO:0001756~somitogenesis	2	0.0727900169751529	SFRP1, SFRP2	31	25.669829222011384	66.59151188104178
GOTERM_BP_FAT	GO:0006357~regulation of transcription from RNA polymerase II promoter	5	0.07487977449903072	FOS, KLF12, THRB, ZFPM2, KLF4	31	3.0012867728624038	67.66735736670752
GOTERM_BP_FAT	GO:0048514~blood vessel morphogenesis	3	0.07921619123192769	ZFPM2, STAB2, ARHGAP24	31	6.204555878306069	69.79770822349529
GOTERM_BP_FAT	GO:0009991~response to extracellular stimulus	3	0.08509944415689231	FOS, SFRP2, KLF4	31	5.9507331378299115	72.47952553882735
GOTERM_BP_FAT	GO:0007049~cell cycle	5	0.09027469362230194	CDC14A, PTP4A1, CAMK2D, TACC1, FOXN3	31	2.8117725307615564	74.65358407254695
GOTERM_BP_FAT	GO:0034599~cellular response to oxidative stress	2	0.09118373588859266	FOS, SNCA	31	20.29707426856714	75.01853606252656
