# Supplementary material for: Naïve Bayes classifier predicts functional microRNA target interactions in colorectal cancer
Source: Royal Society of Chemistry journal article supplement (doi:10.1039/c5mb00245a), 2015-06-11
Supplement: c5mb00245a8.xlsx [file c5mb00245a8.xlsx]

## Sheet: Positive_TrainingSetg
mRNA target	miRNA	mRNA (5' to 3')	miRNA (3' to 5')	Pubmed ID
ADAM17	miR-145	AUUUAUUUGUGAUGACAACUGGAA	UCCCUAAGGAC-CCUUUUGACCUG	21917858
APC	miR-135a	GGGUUUUUGUUCUGGAAGCCAUA	AGUGUAUCCUUAUUUUUCGGUAU	18632633
APC	miR-135b	GGGUUUUUGUUCUGGAAGCCAUA	AGUGUAUCCUUACUUUUCGGUAU	18632633
ATM	miR-18a	UCAAGUAUUUUAAUUGCACCUUA	GAUAGACGUGAUCUACGUGGAAU	23437304
BCL2	miR-148a	GCUCCGUUUGGCAGUGCAAUGG	UGUUUCAAGACAUCACGUGACU	21455217
BCL2	miR-365	AUCUGUACAUCCUGGGGCAUUA	UAUUCCUAAAAAUCCCCGUAAU	22072615
BCL2	miR-365	AUGGAAUAACUCUGUGGCAUUA	UAUUCCUAAAAAUCCCCGUAAU	22072615
BCL6	miR-127	CUGCAGGCAGACACGGAUCUGA	UCGGUUCGAGUCUGCCUAGGCU	16766263
BMI1	miR-218	CAGUCUGCAAAAGAAGCACAA	UGUACCAAUCUAGUUCGUGUU	23255074
CCL20	miR-21	UUAAUACUAAUUUUCCAUAAGCUA	AGUUGUAGUCAGA--CUAUUCGAU	22099878
CCND1	miR-365	UCUGUUGUAAGAAUAGGCAUUA	UAUUCCUAAAAAUCCCCGUAAU	22072615
CDC25A	miR-21	GGCUUGGCUGCCUGACAUAAGCUA	AGUUGUAGUCAGAC--UAUUCGAU	19826040
CDC25B	miR-141	UACUCUUUCCUAUUUCAGUGUUA	GGUAGAAAUGGU-CUGUCACAAU	23596351
CDC42	miR-185	UUGAAAGUUGCCUUUUCUCUCCA	AGUCCUUGACGGAAA-GAGAGGU	21186079
CDKN1A(p21)	miR-22	CUAGUUCUACCUCAGGCAGCUC	UGUCAAGAAGUUGACCGUCGAA	21565979
CDS2	miR-224	AGCCCAGCUGGU-GUGACUUA	UUGCCUUGGUGAUCACUGAAC	21864507
CHD5	miR-211	CCACCUUGGGACAAAAAGGGAA	UCCGCUUCCUACUGUUUCCCUU	22235338
CTNND1 (catenin d-1)	miR-145	UCUGUUCCAUGC---AACUGGAG	UCCCUAAGGACCCUUUUGACCUG	23499891
DAPK1	miR-103	AUCCUUCCCUUUGGAGAUGCUGAG	AGUAUCGGGACAUGU-UACGACGA	22593189
DAPK1	miR-107	AUCCUUCCCUUUGGAGAUGCUGAG	ACUAUCGGGACAUGU-UACGACGA	22593189
DNMT3A	miR-143	GGGCUUUGCCUUGCGAAAAGGGUUGGACAUCAUCUCC	CUCGA--UGUCACGA--------------AGUAGAGU	19638978
DTL	miR-30a-5p	UUACUAGAGGAAGAUGUUUUAU	GAAGGUCAGCUCCUACAAAUGU	22287560
DTL	miR-30a-5p	CUGCCAGU-AACGCUGUUUAUC	GAAGGUCAGCUCCUACAAAUGU	22287560
E2F1	miR-362-3p	GGAGUC--UGUGU-GGUGUGUA	ACUUAGGAACUUAUCCACACAA	23280316
FASLG (FASL)	miR-21	AGAGGCUUGCAUAAUAAGCUA	AGUUGUAGUCAGACUAUUCGAU	21820586
FOSL1 (Fra-1)	miR-34a	CUAACCCCUUCCAGAUCACUGCCA	UGUUGGUCGA-UUCU-GUGACGGU	22198213
FOSL1 (Fra-1)	miR-34a	CUAACUCACCAGCCCCACUGCCA	UGUUG-GUCGAUUCUGUGACGGU	22198213
FOXL2	miR-30a	CACGGCCUGUACUCGGUUUAC	GAAGGUCAGCUCCUACAAAUGU	25621074
FOXO1	miR-223	GUUCUGCUUUGACAAACUGACA	ACCCCAUAAACUGUUUGACUGU	22569260
FOXO4	miR-499-5p	UUUUUUUGUAGAGAGUCUUAU	UUUGUAGUGACGUUCAGAAUU	21934092
GEMIN2 (SIP1)	miR-141	GCAAAAAUUUUGUACAGUGUUA	GGUAGAAAUGGUCUGUCACAAU	19830559
GEMIN2 (SIP1)	miR-141	CCUUUGCACCAGCUUCAGUGUUA	GGUAGAAAUGGUCU-GUCACAAU	19830559
HDAC4	miR-140-5p	CAGUCUCUGUGU-AAACCACUC	GAUGGUAUCCCAUUUUGGUGAC	19734943
HK2	miR-143	GAUGAAUAGCGAAUCAUCUCA	CUCGAUGUCACGAAGUAGAGU	22691140
HOXB3	miR-28-5p	UCUAAAAGGCAUGAACUCAGCUCCUA	GAGUUAUCUG-AC---ACUCGAGGAA	22240480
IGF1R	miR-139-5p	UACCAGUUUCAAUCACUGUAGA	GACCUCUGUGCACGUGACAUCU	22580051
IGF1R	miR-143	UUUAUAUGUGUAUAUAGACAAAAGAAUACAUCUCA	CUCGAUGU-CACG---------------AAGUAGAGU	25474488
IGF1R	miR-145	GAUUAUUAUUUGGGGGAACUGGAC	UCCCUAA-GGACCCUUUUGACCUG	25474488
IGF1R	miR-497	ACAGAAAAAAAAAAGCUGCUA	UGUUUGGUGUCACACGACGAC	22710713
IRS1	miR-145	UCAGGAUUUCAUUGACUGAACUGCAC	UUCCCUAAGG--ACCCUUUUGACCUG	23201159
KLF4	miR-103	CCAAAGUUUU-CAAACUGCUGCA	AGUAUCGGGACAUGUUACGACGA	22593189
KLF4	miR-103	AAAUAG-CCUAAAUGAUGGUGCU	AGUAUCGGGACAUGUUACGACGA	22593189
KLF4	miR-107	CCAAAGUUUU-CAAACUGCUGCA	ACUAUCGGGACAUGUUACGACGA	22593189
KLF4	miR-107	AAAUAG-CCUAAAUGAUGGUGCU	ACUAUCGGGACAUGUUACGACGA	22593189
KLF4	miR-29a	AAUAGCCUAAAUGAUGGUGCUU	AUUGGCUAAAGUCUACCACGAU	24281002
KRAS	miR-143	AUGUUAAAAGAAGUCAUCUCA	CUCGAUGUCACGAAGUAGAGU	19137007
KRAS	miR-143	AAGUUACAGUUUGCACAAGUUCAUCUCA	CUCGAUGUC--ACG-----AAGUAGAGU	19137007
KRAS	miR-18a*	AAAUGGGGAGGGACUAGGGCAGU	GGUCUUCCUCGUGAAUCCCGUCA	19372139
LGALSL (HSPC159)	miR-224	AAACUUAAUAGAAGUGACUUC	UUGCCUUGGUGAUCACUGAAC	21864507
MACC1	miR-143	AUUAAAAUUUCCUUCAUCUCU	CUCGAUGUCACGAAGUAGAGU	22533346
MIF	miR-451	UGGGGAGAAAU--AAACGGUUU	UUGAGUCAUUACCAUUGCCAAA	19318487
MMP11	Let-7c	CUGGCUGCAACA---UACCUCA	UUGGUAUGUUGGAUGAUGGAGU	21984339
MSH2	miR-21	UGAAGGUAAUAUUGAUAAGCUA	AGUUGUAGUCAGACUAUUCGAU	21078976
MSH6	miR-21	ACAACAUUAUGAUCUAAUAAACUU	AGUUGUAGU-C-AGACUAUUCGAU	21078976
NRAS	miR145	UGAUGUUUAAAAAAUAAAAACUGGAA	UCCCUAAG---GACCCUUUUGACCUG	23201159
PBX3	Let-7c	CAAAACACAGCUUUAUUACCUCA	UUGGUAUGUUG-GAUGAUGGAGU	21984339
PBX3	Let-7c	AGAGUGCUCACUUACUACCUCU	UUGGUAUGUUGGAUGAUGGAGU	21984339
PDCD4	miR-21	AGUGGAAUAUUCUAAUAAGCUA	AGUUGUAGUCAGACUAUUCGAU	18372920
PDHX	miR-26a	CACUGCUCUAGAUAUACUUGAA	UCGGAUAGGACCUAAUGAACUU	24935220
PHLPP1	miR-224	UUUACUCUGUCAGGUGACUUA	UUGCCUUGGUGAUCACUGAAC	23846336
PHLPP2	miR-224	AAUCUUUCCAGUUAGUGACUUU	UUGCCUUGGU-GAUCACUGAAC	23846336
PIK3CD	miR-30a	ACAUGGCUGCCUUUUGUUUACA	GAAGGUCAGCUCCUACAAAUGU	23486085
PIK3R2	miR-126	AGGCAGGUUUUGUACGGUACGU	GCGUAAUAAUGAGUGCCAUGCU	18663744
PIM1	miR-33a	AAAAAUGCACAAACAAUGCAA	ACGUUACGUUGAUGUUACGUG	21690566
PPARA	miR-506	CUGACGGCUGCUGGUGCCUUU	AGAUGAGUCUUCCCACGGAAU	22036718
PPARA	miR-506	UCAGGGUACAGUUUUGCCUUA	AGAUGAGUCUUCCCACGGAAU	22036718
PPARA	miR-506	UCUACU-AG-UGAGUGCCUUA	AGAUGAGUCUUCCCACGGAAU	22036718
PPP1R13L (iASPP)	miR-124	AAAUUUAGUAAUCUGCCUUA	CCGUAAGUGGCCGACGGAAU	23691514
PRL	miR-339-5p	CUGAGGUGCAACUUAACAGGGAG	GCACUCGAGGACCUCCUGUCCCU	23696794
PTEN	miR-21	ACU-UGUGGCAACAGAUAAGUUU	AGU-UGUAGUCAGACUAUUCGAU	23174819
PTEN	miR-32	GUUCUAGAAAUUUUGUGCAAUA	ACGUUGAAUCAUUACACGUUAU	23617834
PTEN	miR-92a	GUUCUAGAAAUUUUGUGCAAUA	UGUCCGGCCCUGUUCACGUUAU	24026406
PTGER4	miR-101	GAAAGAAAU-ACAGUACUGUU	AAGUCAAUAGUGUCAUGACAU	22353936
PTGS2(COX-2)	miR-101	GACAUUUA--AUGGUACUGUA	AAGUCAAUAGUGUCAUGACAU	19133256
PTPN1	miR-362-3p	UAUGUAGUAGUUUGGGUGUGUA	ACUUAGGAACUUAUCCACACAA	23280316
RECK	miR-221	AUAUGUCAGU-GCUGAUGUAGCA	CUUUGGGUCGUCUGUUACAUCGA	24269686
RHOBTB1	miR-31	CAGUAUUCCUUGAACUUGCCA	UCGAUACGGUCGUAGAACGGA	23258531
RHOBTB1	miR-31	CCAUUUGAUUGUAAUCUUGCCA	UCGAUACGGUCG-UAGAACGGA	23258531
RND3	miR-17	UUCUAUGUCUUACAAGCACUUUG	GAUGGACGUGACAUUCGUGAAAC	22132820
RPS6KB1 (p70S6K1)	miR-145	CUAUGUGCUAAGCUUAACUGGAA	UCCCUAAGGACCCUUUUGACCUG	23441135
SIRT1	miR-34a	ACACCCAGCUAGGACCAUUACUGCCA	UGUUGGUCGAUUCU----GUGACGGU	18755897
SLC4A4	miR-224	AAGCUUUCUAUU-GUGACUUU	UUGCCUUGGUGAUCACUGAAC	21864507
SMAD4	miR-130a	AUUUUUUUUUUCUUUUGCACUU	UACGGGAAAAUUGUAACGUGAC	23393589
SMAD4	miR-224	ACUUGAUUUGAU-GUGACUUU	UUGCCUUGGUGAUCACUGAAC	24152489
SMAD4	miR-224	AUAUCAAUUGGCAGUGACUUU	UUGCCUUGGUGAUCACUGAAC	24152489
SMAD4	miR-301a	GAUUUUUUUUUUCUUUUGCACUU	CGAAACUGUUAUGAUAACGUGAC	23393589
SMAD4	miR-454	GAUUUUUUUUUUCUUUUGCACUU	UGGGAUAUUCGUUAUAACGUGAU	23393589
SMAD7	miR-25	CAUUAUUUAUGUAUUGUGCAAUG	AGUCUGGCUCUGU-UCACGUUAC	23435373
SMO	miR-338-3p	GCAGGAAGCCAUAGAUGCUGGC	GUUGUUUUAGUGACUACGACCU	24277750
SNX1	miR-95	UAUGGUACAGUUACACCGUUGAA	ACGAGUUAUUUAUG-GGCAACUU	21427358
SOX2	miR-429	CAACUUUUGU---ACAGUAUUU	UGCCAAAAUGGUCUGUCAUAAU	23111103
STAT1	miR-145	UGAUGGCCCUAAAGGAACUGGAU	UCCCUAAGGACCCUUUUGACCUG	20098684
TGFBR2	miR-106a	UAGCCAAUAACAUUUGCACUUUA	GAUGGACGUGACAUUCGUGAAAA	22912877
TIMP3	miR-191	UUUAUGAAUUUUAUAUUCCGUGA	GUCGACGAAAACCCUAAGGCAAC	24195505
TIMP3	miR-21	CCCACAU-GGGGACAUAAGCUA	AGUUGUAGUCAGACUAUUCGAU	21820586
UHRF2	let-7a	AUUUAUUUUG-CAACUACCUCA	UUGAUAUGUUGGAUGAUGGAGU	22018986
USF2	miR-362-3p	GCUCCCCUUUGG-GGGUGUGUG	ACUUAGGAACUUAUCCACACAA	23280316
YES1	miR-145	AUGUUUUUAAUGGUAAACUGGAA	UCCCUAAGGACCCUUUUGACCUG	20098684
ZEB1	miR-200c	AUGCUAAAUCCGCUUCAGUAUUU	AGGUAGUAAUGGGCCGUCAUAAU	22407310
ZEB1	miR-200c	GGCAUUGUUUUAUCUUAUCAGUAUUA	AGGUAGU--AAU-GGGCCGUCAUAAU	22407310
