# Supplementary material for: Naïve Bayes classifier predicts functional microRNA target interactions in colorectal cancer
Source: Royal Society of Chemistry journal article supplement (doi:10.1039/c5mb00245a), 2015-06-11
Supplement: c5mb00245a9.xlsx [file c5mb00245a9.xlsx]

## Sheet: Negative_TrainingSet
Retrieved from miR2Disease			Retrieved from TargetMiner
hsa-let-7b-5p	CDC25A		hsa -mir-99a	NM_004341	CAD
hsa-let-7b-5p	NRAS		hsa -miR-99b	NM_002165	ID1
hsa-let-7c-5p	BCL2L1		hsa -miR-99b	NM_000432	MYL2
hsa-let-7e-5p	CCND1		hsa-let-7g	NM_005546	ITK
hsa-let-7e-5p	HMGA2		hsa-let-7i	NM_004456	EZH2
hsa-let-7g-5p	BCL2L1		hsa-let-7i	NM_152998	EZH2
hsa-let-7g-5p	COL1A2		hsa-miR-103	NM_000067	CA2
hsa-miR-101-3p	FOS		hsa-miR-103	NM_001094	ASIC2
hsa-miR-101-3p	STMN1		hsa-miR-103	NM_003165	STXBP1
hsa-miR-10a-5p	CHL1		hsa-miR-132	NM_001819	CHGB
hsa-miR-1226-3p	MUC1		hsa-miR-132	NM_016310	POLR3K
hsa-miR-125b-5p	E2F3		hsa-miR-132	NM_000320	QDPR
hsa-miR-125b-5p	ERBB2		hsa-miR-132	NM_004505	USP6
hsa-miR-138-5p	CCND3		hsa-miR-137	NM_005539	INPP5A
hsa-miR-142-3p	RAC1		hsa-miR-137	NM_005574	LMO2
hsa-miR-145-5p	MUC1		hsa-miR-137	NM_002436	MPP1
hsa-miR-16-5p	PTGS2		hsa-miR-137	NM_024663	NPEPL1
hsa-miR-17-3p	SOD2		hsa-miR-137	NM_001001433	STX16
hsa-miR-17-3p	VIM		hsa-miR-137	NM_003763	STX16
hsa-miR-17-5p	CCND1		hsa-miR-138	NM_003592	CUL1
hsa-miR-17-5p	PTEN		hsa-miR-138	NM_002109	HARS
hsa-miR-185-5p	SIX1		hsa-miR-138	NM_003325	HIRA
hsa-miR-18a-5p	ATM		hsa-miR-138	NM_002695	POLR2E
hsa-miR-194-5p	CDH2		hsa-miR-138	NM_002738	PSMD7
hsa-miR-194-5p	HBEGF		hsa-miR-143	NM_001185	AZGP1
hsa-miR-194-5p	IGF1R		hsa-miR-143	NM_000867	HTR2B
hsa-miR-194-5p	ITGA9		hsa-miR-145	NM_000350	ABCA4
hsa-miR-194-5p	PTPN12		hsa-miR-145	NM_001039550	DNAJB2
hsa-miR-194-5p	RAC1		hsa-miR-145	NM_004532	MUC4
hsa-miR-194-5p	SOCS2		hsa-miR-145	NM_015392	NPDC1
hsa-miR-196a-5p	HOXA5		hsa-miR-145	NM_004755	RPS6KA5
hsa-miR-19a-3p	PTEN		hsa-miR-145	NM_005978	S100A2
hsa-miR-19b-3p	CUL5		hsa-miR-145	NM_003008	SLC5A2
hsa-miR-19b-3p	PTEN		hsa-miR-145	NM_004785	SLC9A3R2
hsa-miR-200a-3p	RAB30		hsa-miR-153	NM_001092	ABR
hsa-miR-200b-3p	BCL2		hsa-miR-153	NM_016237	ANAPC5
hsa-miR-200b-3p	XIAP		hsa-miR-153	NM_004644	AP3B2
hsa-miR-200c-3p	BCL2		hsa-miR-153	NM_015185	ARHGEF9
hsa-miR-200c-3p	XIAP		hsa-miR-153	NM_005271	GLUD1
hsa-miR-205-5p	IL24		hsa-miR-153	NM_004128	GTF2F2
hsa-miR-205-5p	IL32		hsa-miR-153	NM_005343	HRAS
hsa-miR-212-3p	PTCH1		hsa-miR-153	NM_176795	HRAS
hsa-miR-21-5p	ANKRD46		hsa-miR-153	NM_006158	NEFL
hsa-miR-21-5p	CCR1		hsa-miR-153	NM_001037132	NRCAM
hsa-miR-21-5p	EIF4A2		hsa-miR-153	NM_005010	NRCAM
hsa-miR-21-5p	ICAM1		hsa-miR-153	NM_006176	NRGN
hsa-miR-21-5p	IL1B		hsa-miR-153	NM_000320	QDPR
hsa-miR-21-5p	PLAT		hsa-miR-153	NM_005648	TCEB1
hsa-miR-21-5p	PTX3		hsa-miR-153	NM_003367	USF2
hsa-miR-21-5p	TNFAIP3		hsa-miR-153	NM_207291	USF2
hsa-miR-219a-5p	GPC3		hsa-miR-155	NM_001122	PLIN2
hsa-miR-29b-3p	COL1A1		hsa-miR-155	NM_004683	RGN
hsa-miR-29b-3p	COL3A1		hsa-miR-155	NM_152869	RGN
hsa-miR-29b-3p	COL4A1		hsa-miR-15a	NM_006412	AGPAT2
hsa-miR-29b-3p	MMP2		hsa-miR-15a	NM_001040031	CD37
hsa-miR-29b-3p	MMP2		hsa-miR-15a	NM_005675	DGCR6
hsa-miR-30c-1-3p	HMBOX1		hsa-miR-15a	NM_018696	ELAC1
hsa-miR-31-5p	DACT3		hsa-miR-15a	NM_000190	HMBS
hsa-miR-31-5p	DKK1		hsa-miR-15a	NM_001024382	HMBS
hsa-miR-337-3p	STAT3		hsa-miR-15a	NM_002134	HMOX2
hsa-miR-339-5p	BCL6		hsa-miR-15a	NM_005529	HSPG2
hsa-miR-342-3p	BMP7		hsa-miR-15a	NM_001003941	OGDH
hsa-miR-342-3p	GEMIN4		hsa-miR-15a	NM_002541	OGDH
hsa-miR-34a-5p	AXL		hsa-miR-15a	NM_006254	PRKCD
hsa-miR-372-3p	CCNA1		hsa-miR-15a	NM_212539	PRKCD
hsa-miR-375	MTDH		hsa-miR-15a	NM_000552	VWF
hsa-miR-375	RASD1		hsa-miR-191	NM_001014444	CRYM
hsa-miR-375	YAP1		hsa-miR-191	NM_001888	CRYM
hsa-miR-429	XIAP		hsa-miR-191	NM_004420	DUSP8
hsa-miR-590-5p	TGFBR2		hsa-miR-191	NM_022003	FXYD6
hsa-let-7a	CDK6		hsa-miR-191	NM_002109	HARS
hsa-let-7a	CCND2		hsa-miR-191	NM_002126	HLF
hsa-let-7a	CCND2		hsa-miR-191	NM_003846	PEX11B
hsa-let-7a	CDC25A		hsa-miR-196b	NM_001870	CPA3
hsa-let-7a	UHRF2(NIRF)		hsa-miR-196b	NM_014164	FXYD5
hsa-let-7b	CDK6		hsa-miR-196b	NM_144779	FXYD5
hsa-let-7c	CDK6		hsa-miR-196b	NM_003120	STXBP1
hsa-let-7g	CDK6		hsa-miR-200a	NM_021804	ACE2
hsa-miR-10b	HOXD10		hsa-miR-200a	NM_030765	B3GNT4
hsa-miR-125a	ELAVL1(HuR)		hsa-miR-200a	NM_002020	FLT4
hsa-miR-125a	ERBB3		hsa-miR-200a	NM_182925	FLT4
hsa-miR-125b	BAK1		hsa-miR-200a	NM_004988	MAGEA1
hsa-miR-125b	BAK1		hsa-miR-200a	NM_002674	PMCH
hsa-miR-125b	ERBB3		hsa-miR-200a	NM_004170	SLC1A1
hsa-miR-125b	Lin28B		hsa-miR-203	NM_002087	GRN
hsa-miR-125b	PIK3CD		hsa-miR-204	NM_014384	ACAD8
hsa-miR-126b	STARD13		hsa-miR-204	NM_006066	AKR1A1
hsa-miR-137	CDC42		hsa-miR-204	NM_004110	FDXR
hsa-miR-137	CDK6		hsa-miR-204	NM_000159	GCDH
hsa-miR-137	ESRRA		hsa-miR-204	NM_013976	GCDH
hsa-miR-138	EZH2		hsa-miR-204	NM_014236	GNPAT
hsa-miR-143	BCL2		hsa-miR-204	NM_000520	HEXA
hsa-miR-146a	BRCA1		hsa-miR-204	NM_002147	HOXB5
hsa-miR-146a	IRAK1		hsa-miR-204	NM_182710	KAT5
hsa-miR-146a	ROCK1		hsa-miR-204	NM_002361	MAG
hsa-miR-146a	TRAF6		hsa-miR-204	NM_002428	MMP15
hsa-miR-150	TP53		hsa-miR-204	NM_015971	MRPS7
hsa-miR-154	CCND2		hsa-miR-204	NM_000294	PHKG2
hsa-miR-15a	WNT3A		hsa-miR-204	NM_005605	PPP3CC
hsa-miR-16	CCND1		hsa-miR-204	NM_002980	SEMG2
hsa-miR-182	FOXO1		hsa-miR-204	NM_005074	SLC17A1
hsa-miR-196a	FOXO1		hsa-miR-204	NM_004790	SLC22A6
hsa-miR-196a	NTN4		hsa-miR-204	NM_178424	SOX30
hsa-miR-196a	TOX3		hsa-miR-204	NM_003041	SPI1
hsa-miR-196b	HOXB7		hsa-miR-204	NM_004505	USP6
hsa-miR-19a	CUL5		hsa-miR-205	NM_001886	CRYBA4
hsa-miR-200a	ZEB2		hsa-miR-205	NM_004103	PTK2B
hsa-miR-203	LASP1		hsa-miR-205	NM_173174	PTK2B
hsa-miR-205	CYR61		hsa-miR-205	NM_173176	PTK2B
hsa-miR-205	ERBB3(HER3)		hsa-miR-205	NM_005978	S100A2
hsa-miR-205	ZEB1		hsa-miR-205	NM_030960	SPACA1
hsa-miR-205	ZEB2		hsa-miR-205	NM_030770	TMPRSS5
hsa-miR-21	BCL2		hsa-miR-22	NM_001144	AMFR
hsa-miR-21	SERPINB5		hsa-miR-22	NM_005700	DPP3
hsa-miR-26b	PTGS2		hsa-miR-22	NM_001013436	MPST
hsa-miR-27a	ZBTB10		hsa-miR-22	NM_005029	PITX3
hsa-miR-29a	DNMT3B		hsa-miR-22	NM_022449	RAB17
hsa-miR-29a	HSP47		hsa-miR-22	NM_005855	RAMP1
hsa-miR-29b	DNMT3B		hsa-miR-221	NM_004541	NDUFA1
hsa-miR-29c	DNMT3B		hsa-miR-221	NM_024663	NPEPL1
hsa-miR-30c	PPARGC1B		hsa-miR-221	NM_014820	TOMM70A
hsa-miR-30c	PTPDC1		hsa-miR-23a	NM_005720	ARPC1B
hsa-miR-30c	UBAC1		hsa-miR-23a	NM_003890	FCGBP
hsa-miR-328	ABCG2		hsa-miR-23a	NM_003255	TIMP2
hsa-miR-335	SOX4		hsa-miR-23b	NM_001163	APBA1
hsa-miR-34a	AXL		hsa-miR-23b	NM_000191	HMGCL
hsa-miR-371-5p	PRPF4B		hsa-miR-23b	NM_005001	NDUFA7
hsa-miR-375	sp1		hsa-miR-23b	NM_000435	NOTCH3
hsa-miR-497	BCL2L2(Bcl-w)		hsa-miR-24	NM_001124	ADM
hsa-miR-503	FGF2		hsa-miR-24	NM_004750	CRLF1
hsa-miR-503	VEGFA		hsa-miR-24	NM_004429	EFNB1
hsa-miR-7	EGFR		hsa-miR-24	NM_002084	GPX3
hsa-miR-7	EGFR		hsa-miR-24	NM_002403	MFAP2
hsa-miR-7	PAK1		hsa-miR-24	NM_017459	MFAP2
hsa-miR-7	XIAP		hsa-miR-24	NM_004995	MMP14
hsa-miR-99a	Mtor		hsa-miR-24	NM_002964	SCTR
			hsa-miR-26a	NM_000719	CACNA1C
			hsa-miR-26a	NM_018222	PARVA
			hsa-miR-26a	NM_004684	SPARCL1
			hsa-miR-26b	NM_000210	ITGA6
			hsa-miR-26b	NM_017426	NUP54
			hsa-miR-26b	NM_018222	PARVA
			hsa-miR-26b	NM_004684	SPARCL1
			hsa-miR-27a	NM_000610	CD44
			hsa-miR-27a	NM_001001389	CD44
			hsa-miR-27a	NM_001001390	CD44
			hsa-miR-27a	NM_001001391	CD44
			hsa-miR-27a	NM_001001392	CD44
			hsa-miR-27a	NM_198256	E2F6
			hsa-miR-27a	NM_005545	ISLR
			hsa-miR-27a	NM_201526	ISLR
			hsa-miR-27a	NM_000248	MITF
			hsa-miR-27a	NM_198158	MITF
			hsa-miR-27a	NM_198159	MITF
			hsa-miR-27a	NM_198177	MITF
			hsa-miR-27a	NM_198178	MITF
			hsa-miR-29a	NM_014296	CAPN7
			hsa-miR-29a	NM_001856	COL16A1
			hsa-miR-29a	NM_002403	MFAP2
			hsa-miR-29a	NM_017459	MFAP2
			hsa-miR-29a	NM_016831	PER3
			hsa-miR-29b	NM_000067	CA2
			hsa-miR-29b	NM_002079	GOT1
			hsa-miR-29b	NM_201535	NDRG2
			hsa-miR-29b	NM_201537	NDRG2
			hsa-miR-29b	NM_201539	NDRG2
			hsa-miR-29b	NM_201540	NDRG2
			hsa-miR-29b	NM_002811	PSMD8
			hsa-miR-30c	NM_000696	ALDH9A1
			hsa-miR-30c	NM_000727	CACNG1
			hsa-miR-30c	NM_000124	ERCC6
			hsa-miR-30c	NM_002084	GPX3
			hsa-miR-30c	NM_005550	KIFC3
			hsa-miR-30c	NM_002560	P2RX4
			hsa-miR-30c	NM_002631	PGD
			hsa-miR-30c	NM_002633	PGM1
			hsa-miR-30c	NM_003891	PROZ
			hsa-miR-30c	NM_003569	STX7
			hsa-miR-345	NM_018962	RIPPLY3
			hsa-miR-7	NM_022169	ABCG4
			hsa-miR-7	NM_002390	ADAM11
			hsa-miR-7	NM_004322	BAD
			hsa-miR-7	NM_005872	BCAS2
			hsa-miR-7	NM_004378	CRABP1
			hsa-miR-7	NM_000835	GRIN2C
			hsa-miR-7	NM_006343	MERTK
			hsa-miR-7	NM_002436	MPP1
			hsa-miR-7	NM_002695	PRKCB
			hsa-miR-9	NM_005891	ACAT2
			hsa-miR-9	NM_005736	ACTR1A
			hsa-miR-9	NM_003458	BSN
			hsa-miR-9	NM_006549	CAMKK2
			hsa-miR-9	NM_153499	CAMKK2
			hsa-miR-9	NM_153500	CAMKK2
			hsa-miR-9	NM_172214	CAMKK2
			hsa-miR-9	NM_172215	CAMKK2
			hsa-miR-9	NM_172216	CAMKK2
			hsa-miR-9	NM_172226	CAMKK2
			hsa-miR-9	NM_014292	CBX6
			hsa-miR-9	NM_002300	LDHB
			hsa-miR-9	NM_000255	MUT
			hsa-miR-9	NM_001032221	STXBP1
			hsa-miR-9	NM_003165	STXBP1
			hsa-miR-9	NM_004505	USP6
