# Supplementary figures and images for: Naïve Bayes classifier predicts functional microRNA target interactions in colorectal cancer
Source: Royal Society of Chemistry journal article supplement (doi:10.1039/c5mb00245a), 2015-06-11

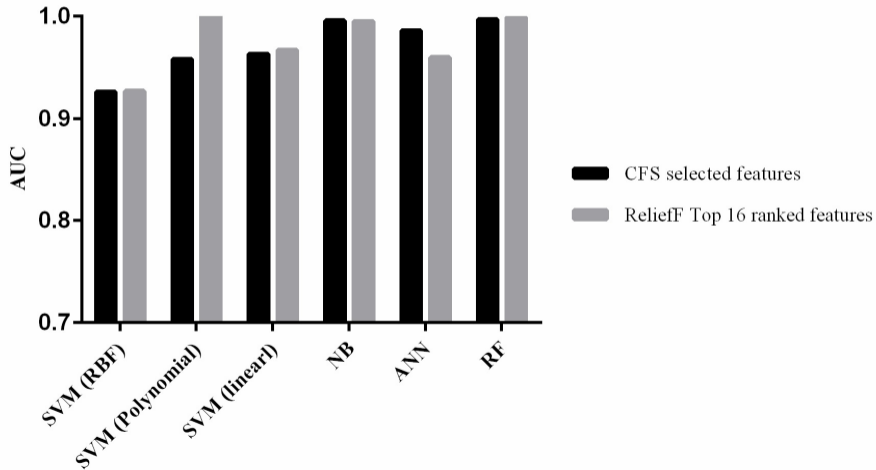

Supplement: c5mb00245a2.pdf [file c5mb00245a2.pdf]

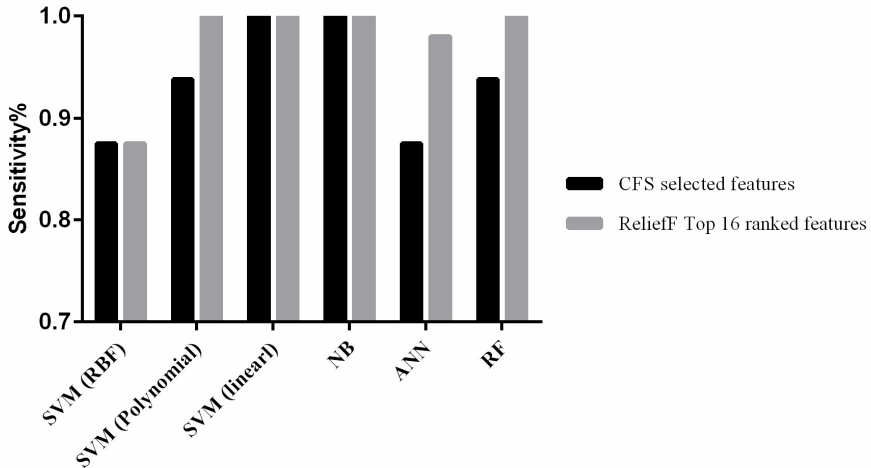

Supplement: c5mb00245a3.pdf [file c5mb00245a3.pdf]
